# Supplementary material
Source: PubMed Central journal article supplement (PMC3523363)
Supplement: NIHMS371696-supplement-1_si_001.pdf [file NIHMS371696-supplement-1_si_001.pdf]

# Supporting Information

## Phthalocyanine-Peptide Conjugates for Epidermal Growth Factor Receptor Targeting

*Benson G. Ongarora,<sup>a</sup> Krystal Fontenot,<sup>a</sup> Xiaoke Hu,<sup>a</sup> Inder Seghal,<sup>b</sup> Seetharama D.*

*Satyanarayanaiois<sup>c</sup> and M. Graça H. Vicente<sup>a,\*</sup>*

<sup>a</sup>Louisiana State University, Department of Chemistry, Baton Rouge LA, 70803, USA

<sup>b</sup>Louisiana State University, School of Veterinary Medicine, Baton Rouge LA, 70803, USA

<sup>c</sup>University of Louisiana at Monroe, College of Pharmacy, Monroe LA, 71209, USA

### TABLE OF CONTENTS

|                                                                                                             |    |
|-------------------------------------------------------------------------------------------------------------|----|
| <b>Figures S1-S4:</b> Subcellular Images in A431 Cells.....                                                 | 2  |
| <b>Figures S5-S9:</b> Subcellular Images in HEP2 Cells .....                                                | 6  |
| <b>Figures S10-S13:</b> Subcellular Images in HT-29 Cells .....                                             | 11 |
| <b>Figures S14-S16:</b> Subcellular fluorescence of Pcs in Tumor cells .....                                | 15 |
| <b>Figures S17-S19:</b> HPLC traces, Absorption and Emission spectra .....                                  | 17 |
| <b>Figures S20-S21:</b> Cytotoxicity in different cell lines .....                                          | 19 |
| <b>Figures S22-S34:</b> Mass Spectra for Pcs and their Conjugates .....                                     | 21 |
| <b>Figures S35-S52:</b> <sup>1</sup> HNMR and <sup>13</sup> CNMR Spectra for Pcs and their Conjugates ..... | 35 |
| <b>Figures S53-S54:</b> MALDI-TOF (MS) spectra for tumor extracts at 24 and 96 h.....                       | 52 |
| <b>Figures S55-S56:</b> Low energy docked structures for Pcs 4b, 5b and 6a .....                            | 54 |
| <b>Figure S57:</b> Effect of the DMSO and Cremophor on HT-29 eGFP and A431 cells .....                      | 56 |
| <b>Table S1:</b> Binding of Pc, Pc-Conjugates and EGFR ligands to EGFR .....                                | 58 |

## Subcellular localization in A431 cells

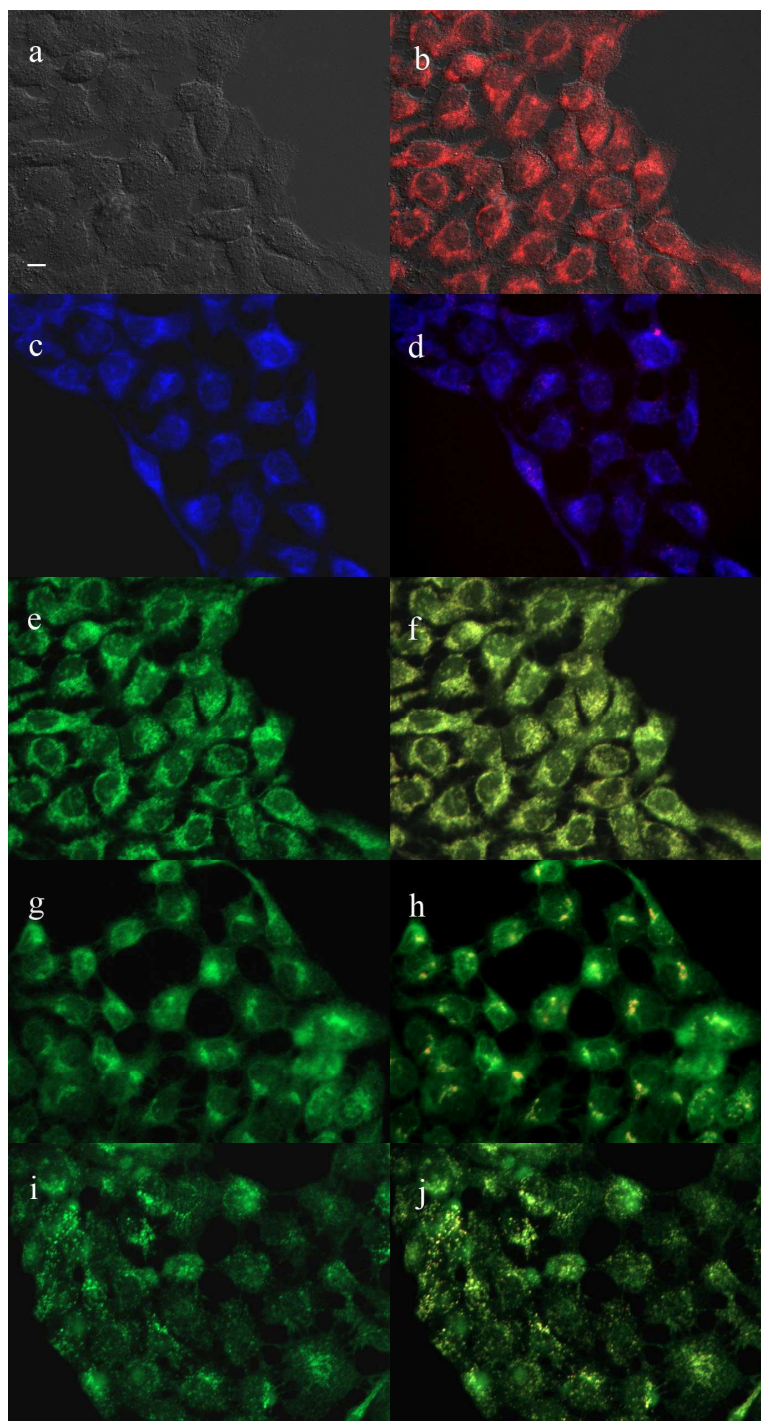

**Figure S1.** Subcellular localization of Pc **3a** in A431 cells at 10  $\mu$ M for 6 h. (a) Phase contrast, (b) Overlay of **3a** fluorescence and phase contrast, (c) ER Tracker Blue/White fluorescence, (e) MitoTrack green fluorescence, (g) BoDIPY Ceramide, (i) LysoSensor green fluorescence, and (d, f, h, j) overlays of organelle tracers with **3a** fluorescence. Scale bar: 10  $\mu$ m.

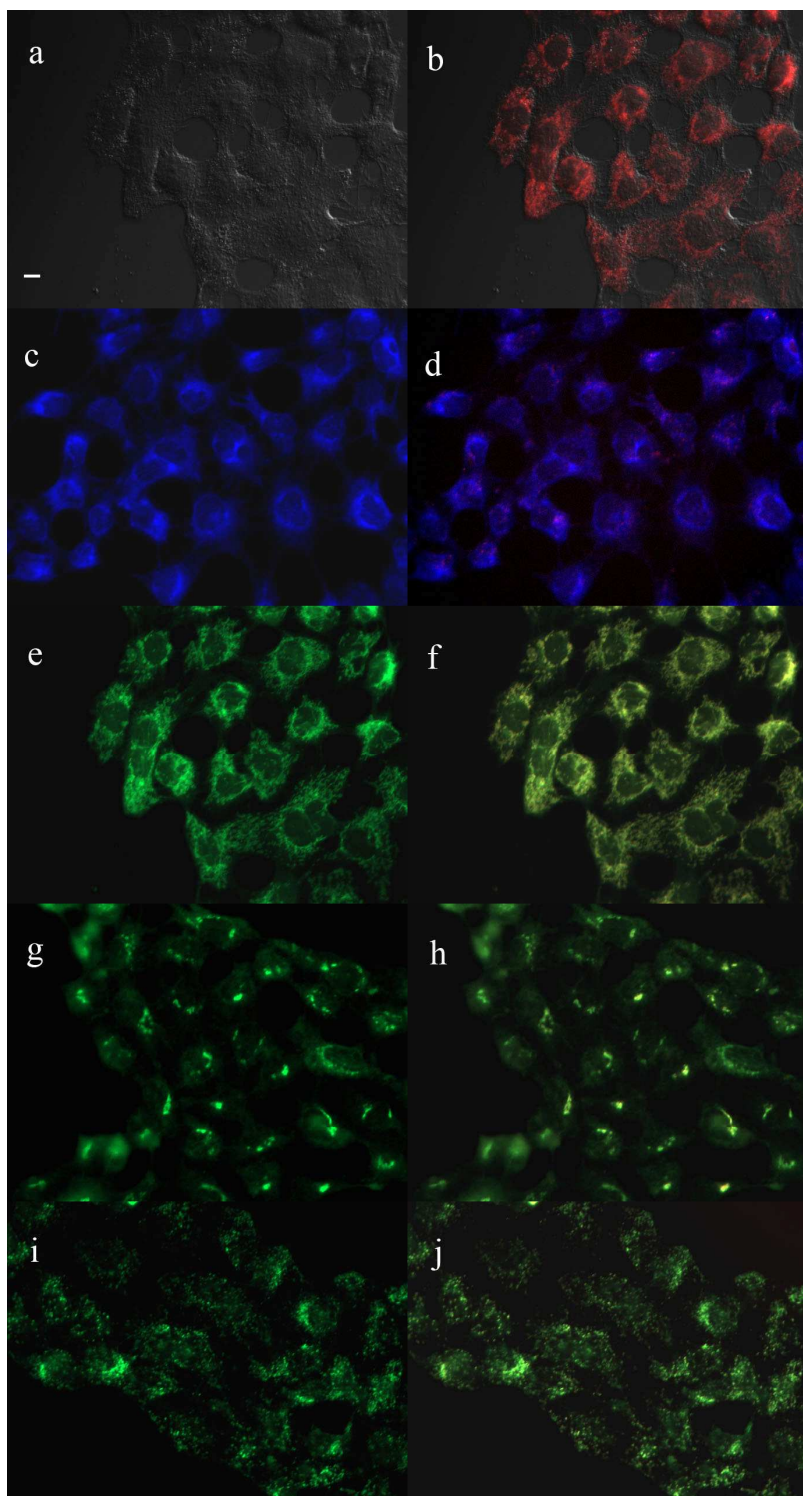

**Figure S2.** Subcellular localization of Pc **4b** in A431 cells at 10  $\mu$ M for 6 h. (a) Phase contrast, (b) Overlay of **4b** fluorescence and phase contrast, (c) ER Tracker Blue/White fluorescence, (e) MitoTrack green fluorescence, (g) BoDIPY Ceramide, (i) LysoSensor green fluorescence, and (d, f, h, j) overlays of organelle tracers with **4b** fluorescence. Scale bar: 10  $\mu$ m.

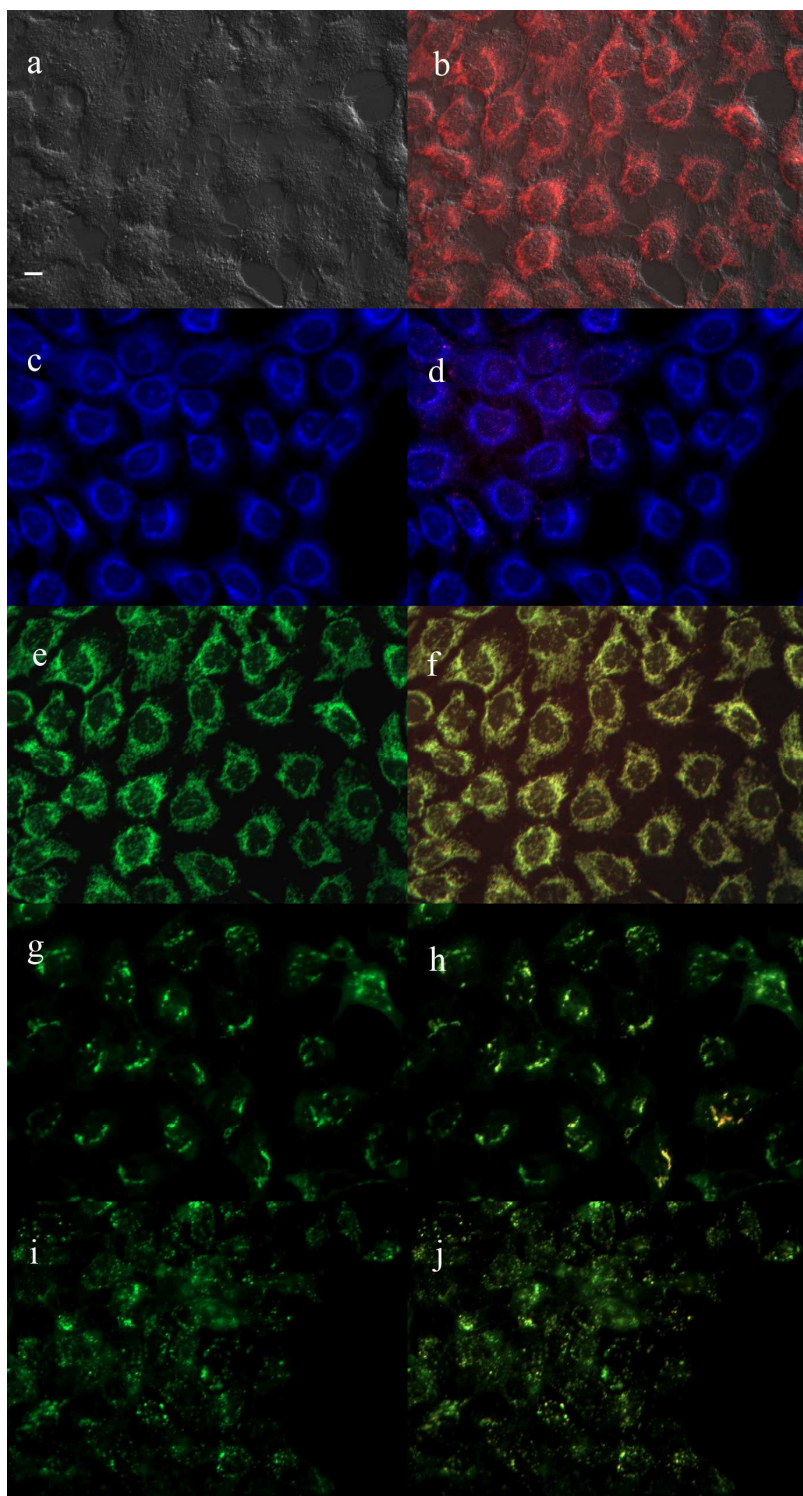

**Figure S3.** Subcellular localization of Pc **6a** in A431 cells at 10  $\mu$ M for 6 h. (a) Phase contrast, (b) Overlay of **6a** fluorescence and phase contrast, (c) ER Tracker Blue/White fluorescence, (e) MitoTrack green fluorescence, (g) BoDIPY Ceramide, (i) LysoSensor green fluorescence, and (d, f, h, j) overlays of organelle tracers with **6a** fluorescence. Scale bar: 10  $\mu$ m.

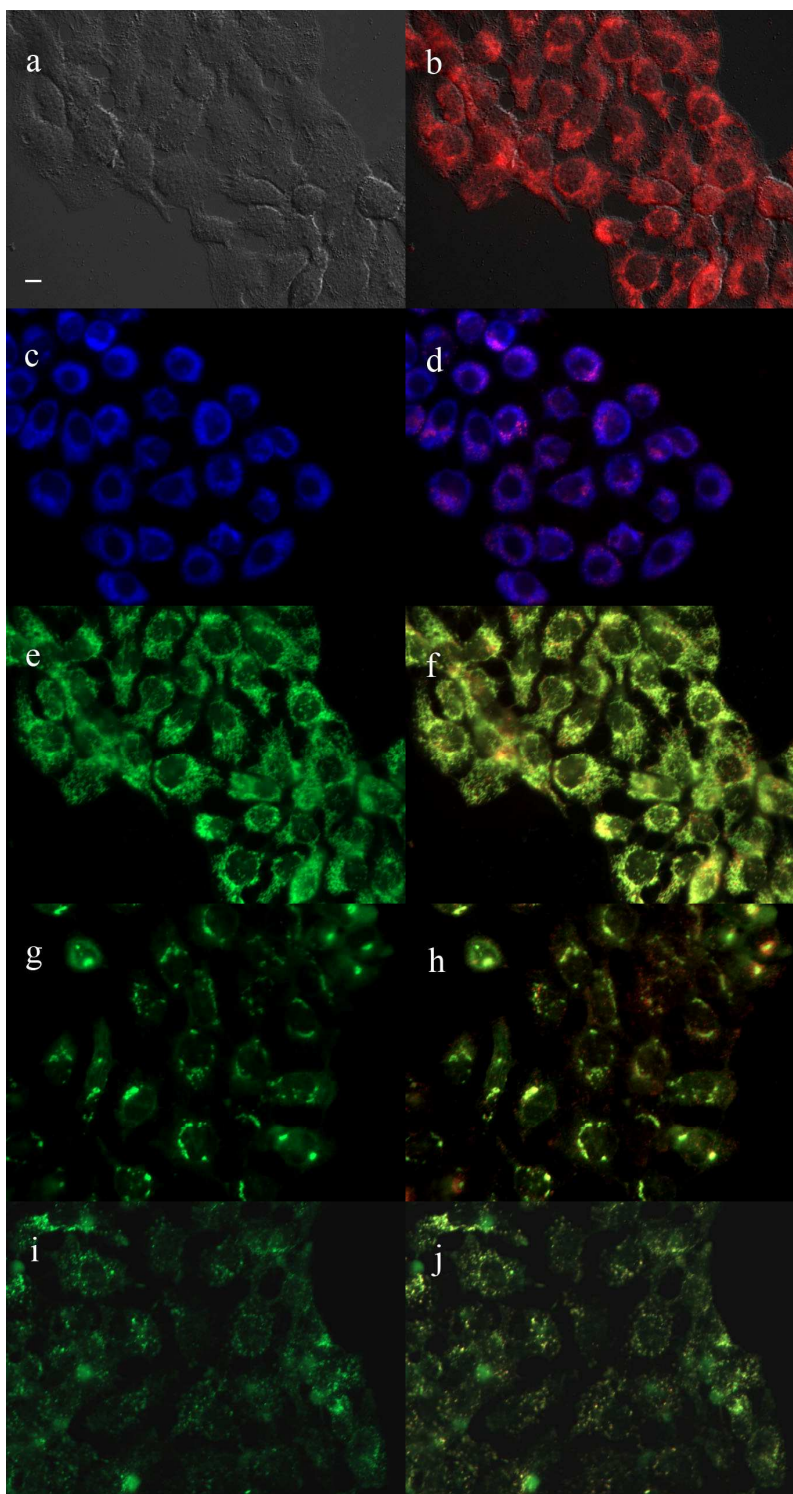

**Figure S4.** Subcellular localization of Pc **5a** in A431 cells at 10  $\mu$ M for 6 h. (a) Phase contrast, (b) Overlay of **5a** fluorescence and phase contrast, (c) ER Tracker Blue/White fluorescence, (e) MitoTrack green fluorescence, (g) BoDIPY Ceramide, (i) LysoSensor green fluorescence, and (d, f, h, j) overlays of organelle tracers with **5a** fluorescence. Scale bar: 10  $\mu$ m.

## Subcellular localization in HEp2 cells

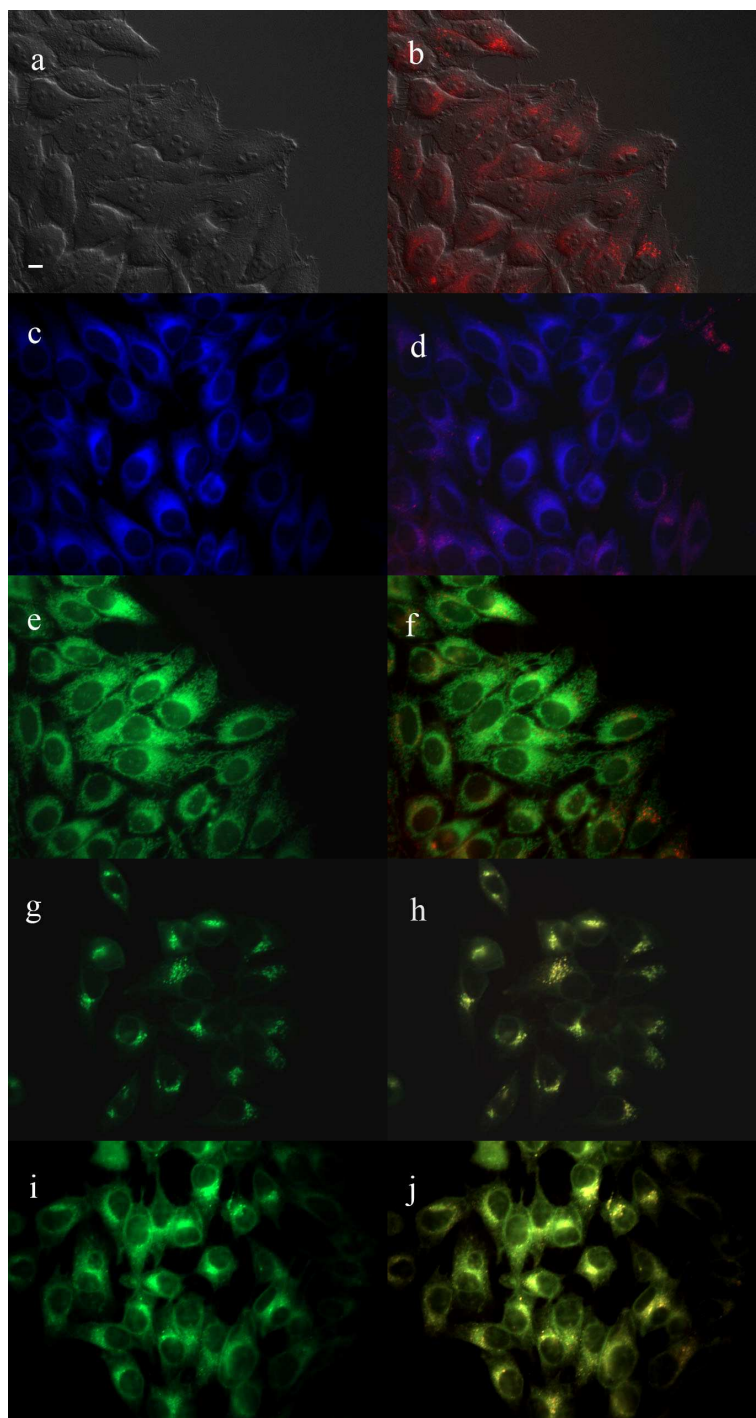

**Figure S5.** Subcellular localization of Pc **3a** in HEp2 cells at 10  $\mu$ M for 6 h. (a) Phase contrast, (b) Overlay of **3a** fluorescence and phase contrast, (c) ER Tracker Blue/White fluorescence, (e) MitoTrack green fluorescence, (g) BoDIPY Ceramide, (i) LysoSensor green fluorescence, and (d, f, h, j) overlays of organelle tracers with **3a** fluorescence. Scale bar: 10  $\mu$ m.

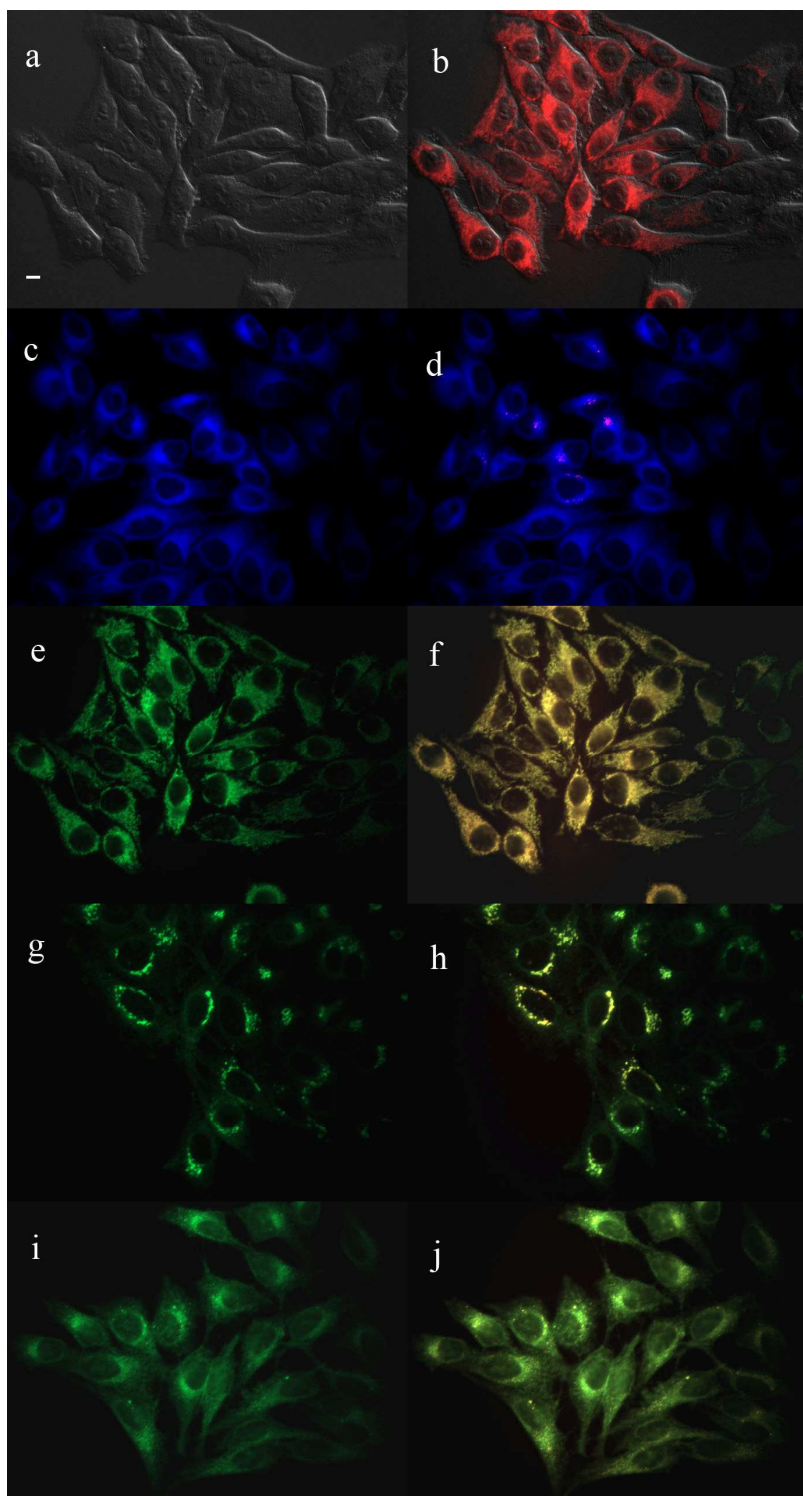

**Figure S6.** Subcellular localization of Pc **4b** in HEp2 cells at 10  $\mu$ M for 6 h. (a) Phase contrast, (b) Overlay of **4b** fluorescence and phase contrast, (c) ER Tracker Blue/White fluorescence, (e) MitoTrack green fluorescence, (g) BoDIPY Ceramide, (i) LysoSensor green fluorescence, and (d, f, h, j) overlays of organelle tracers with **4b** fluorescence. Scale bar: 10  $\mu$ m.

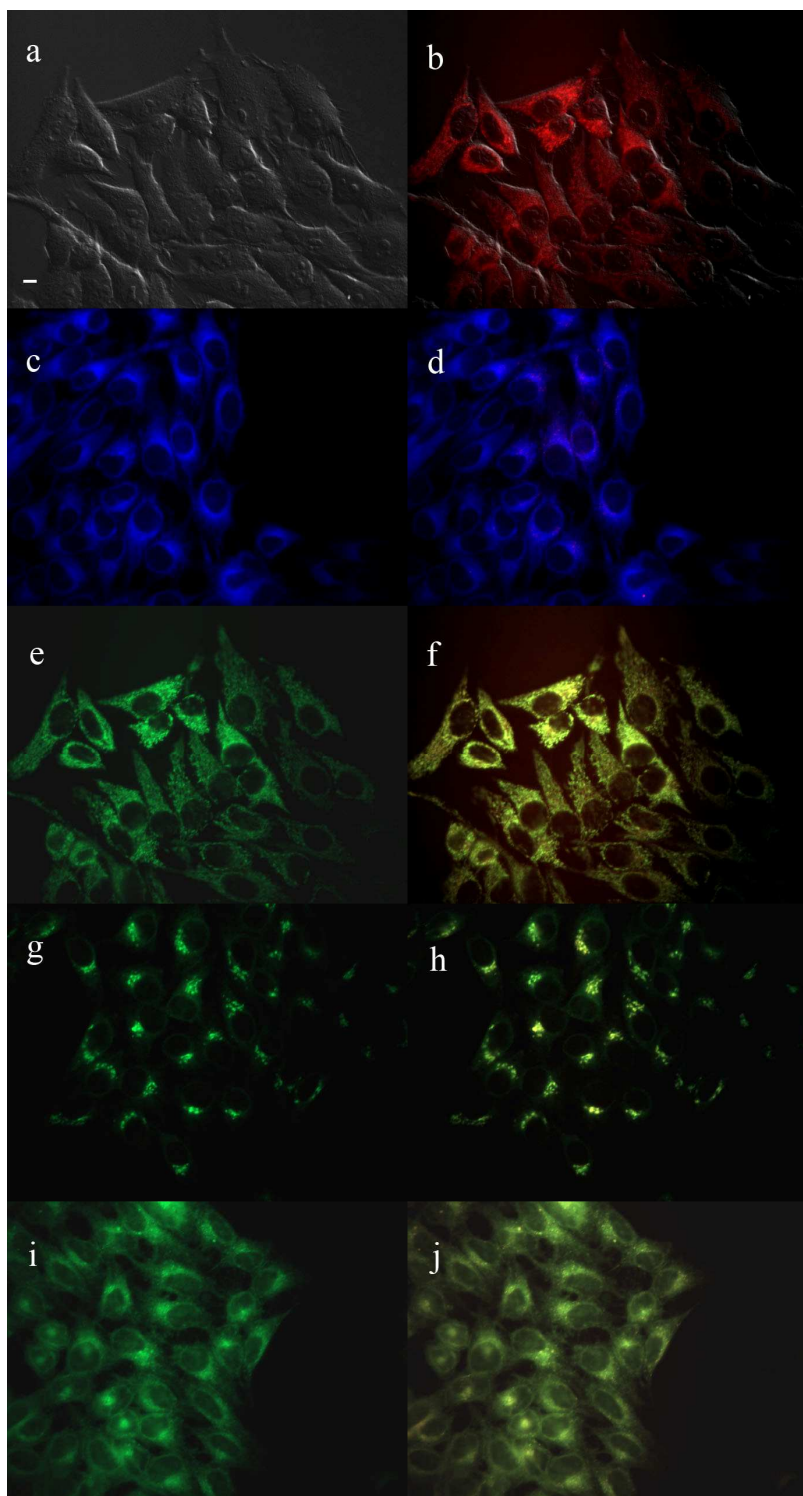

**Figure S7.** Subcellular localization of Pc **6a** in HEp2 cells at 10  $\mu$ M for 6 h. (a) Phase contrast, (b) Overlay of **6a** fluorescence and phase contrast, (c) ER Tracker Blue/White fluorescence, (e) MitoTrack green fluorescence, (g) BoDIPY Ceramide, (i) LysoSensor green fluorescence, and (d, f, h, j) overlays of organelle tracers with **6a** fluorescence. Scale bar: 10  $\mu$ m.



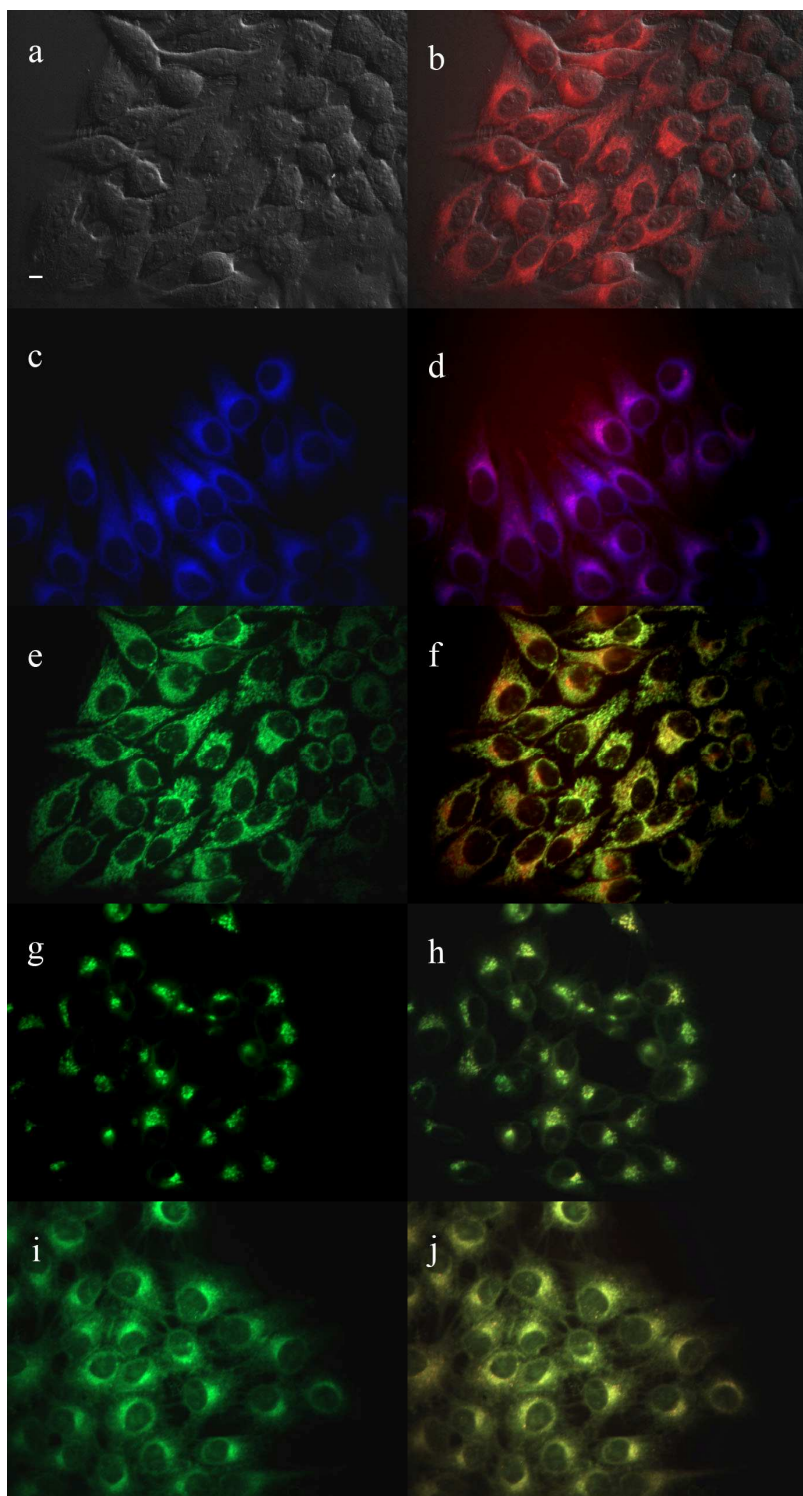

**Figure S8.** Subcellular localization of Pc **5a** in HEp2 cells at 10  $\mu$ M for 6 h. (a) Phase contrast, (b) Overlay of **5a** fluorescence and phase contrast, (c) ER Tracker Blue/White fluorescence, (e) MitoTrack green fluorescence, (g) BoDIPY Ceramide, (i) LysoSensor green fluorescence, and (d, f, h, j) overlays of organelle tracers with **5a** fluorescence. Scale bar: 10  $\mu$ m.

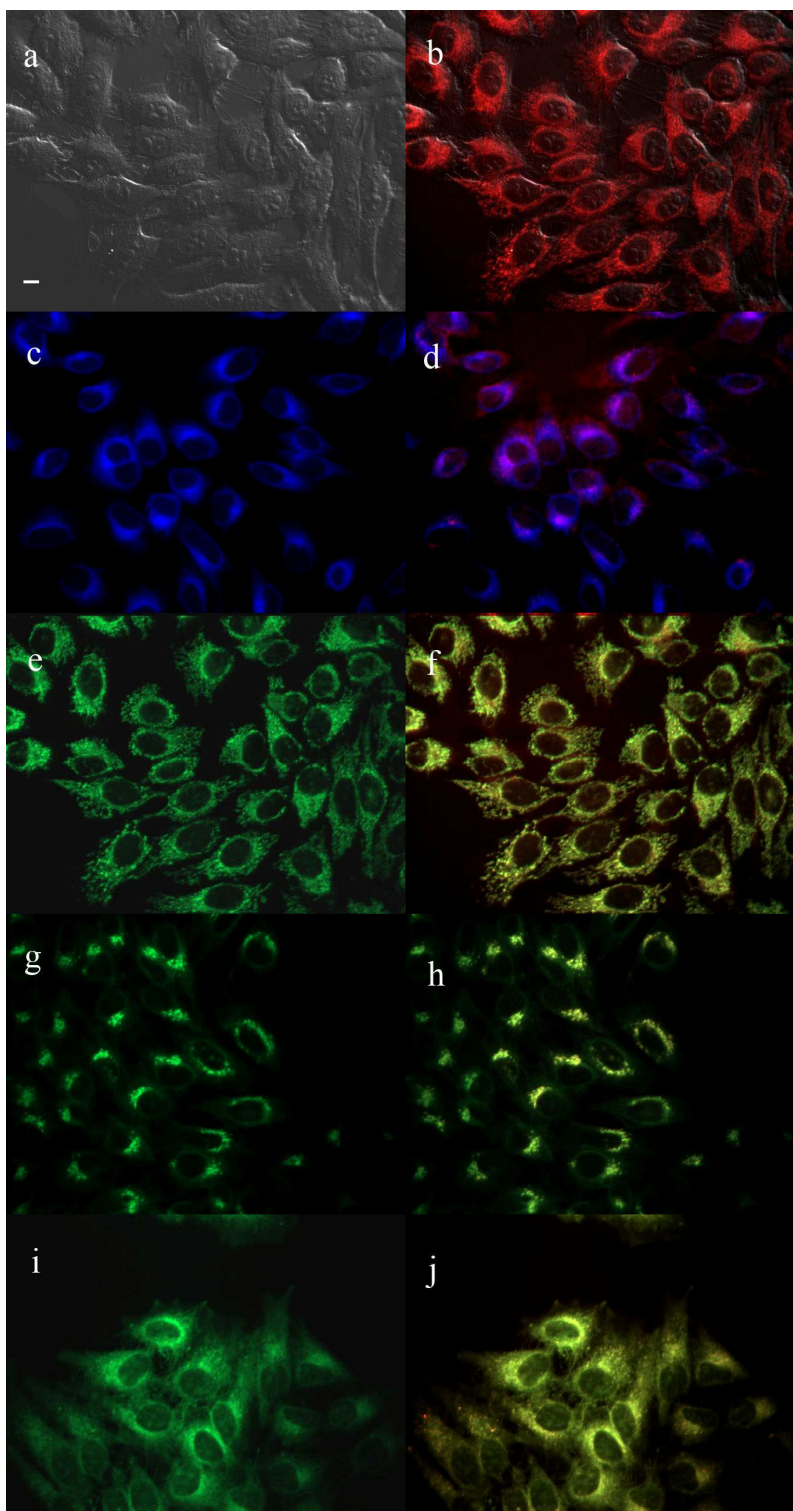

**Figure S9.** Subcellular localization of Pc **5b** in HEp2 cells at 10  $\mu$ M for 6 h. (a) Phase contrast, (b) Overlay of **5b** fluorescence and phase contrast, (c) ER Tracker Blue/White fluorescence, (e) MitoTrack green fluorescence, (g) BoDIPY Ceramide, (i) LysoSensor green fluorescence, and (d, f, h, j) overlays of organelle tracers with **5b** fluorescence. Scale bar: 10  $\mu$ m.

## Subcellular localization in HT-29 cells

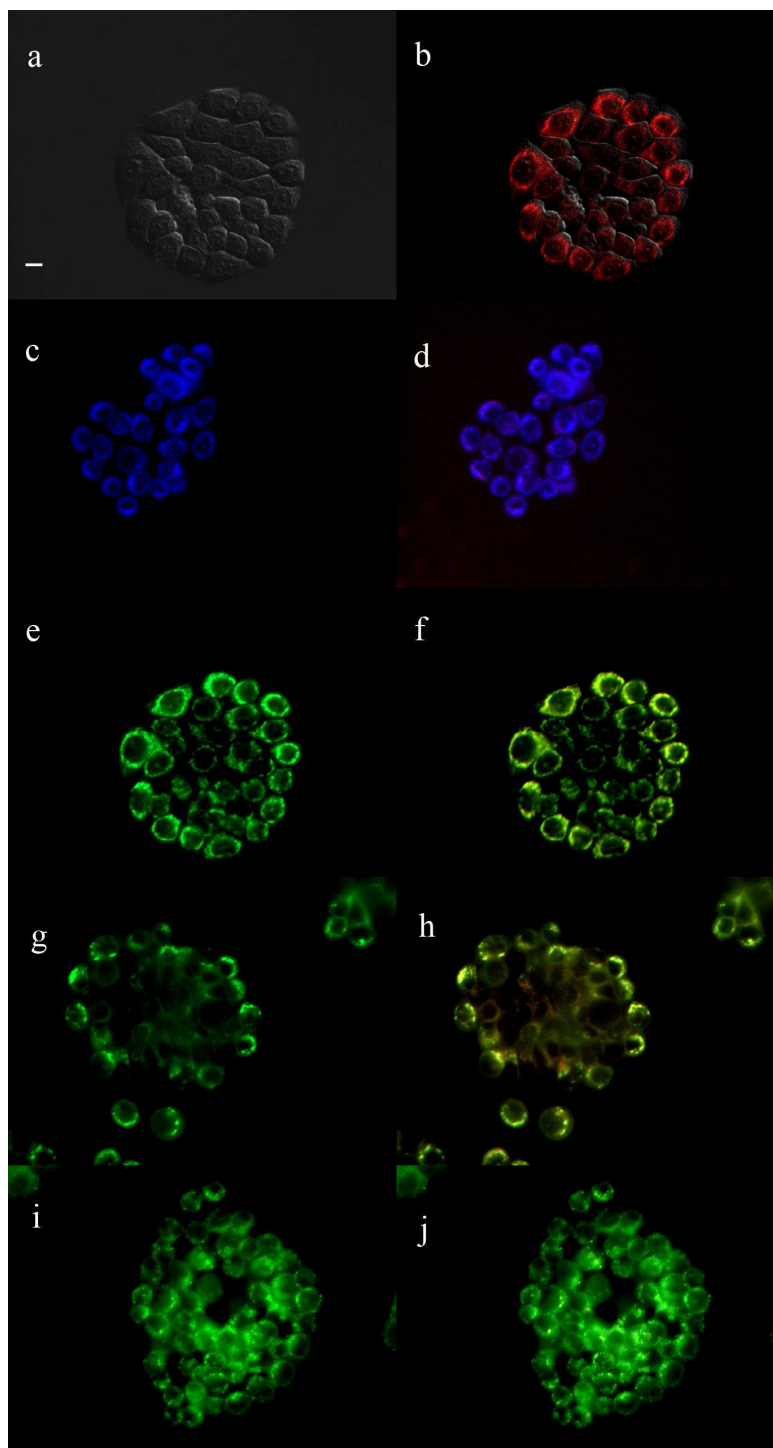

**Figure S10.** Subcellular localization of Pc **4b** in HT-29 cells at 10  $\mu\text{M}$  for 6 h. (a) Phase contrast, (b) Overlay of **4b** fluorescence and phase contrast, (c) ER Tracker Blue/White fluorescence, (e) MitoTrack green fluorescence, (g) BoDIPY Ceramide, (i) LysoSensor green fluorescence, and (d, f, h, j) overlays of organelle tracers with **4b** fluorescence. Scale bar: 10  $\mu\text{m}$ .

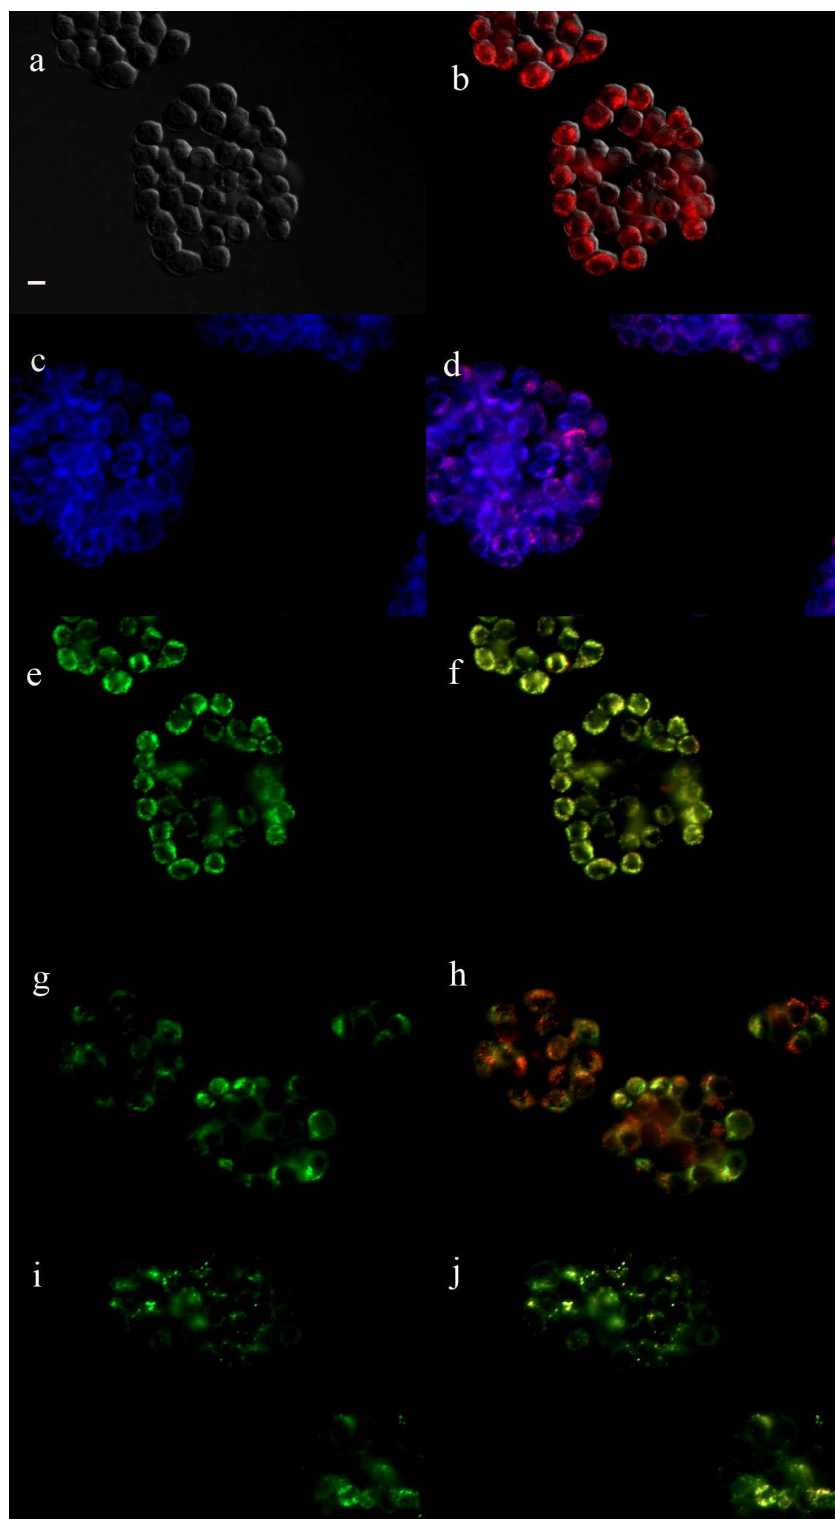

**Figure S11.** Subcellular localization of Pc **5a** in HT-29 cells at 10  $\mu\text{M}$  for 6 h. (a) Phase contrast, (b) Overlay of **5a** fluorescence and phase contrast, (c) ER Tracker Blue/White fluorescence, (e) MitoTrack green fluorescence, (g) BoDIPY Ceramide, (i) LysoSensor green fluorescence, and (d, f, h, j) overlays of organelle tracers with **5a** fluorescence. Scale bar: 10  $\mu\text{m}$ .

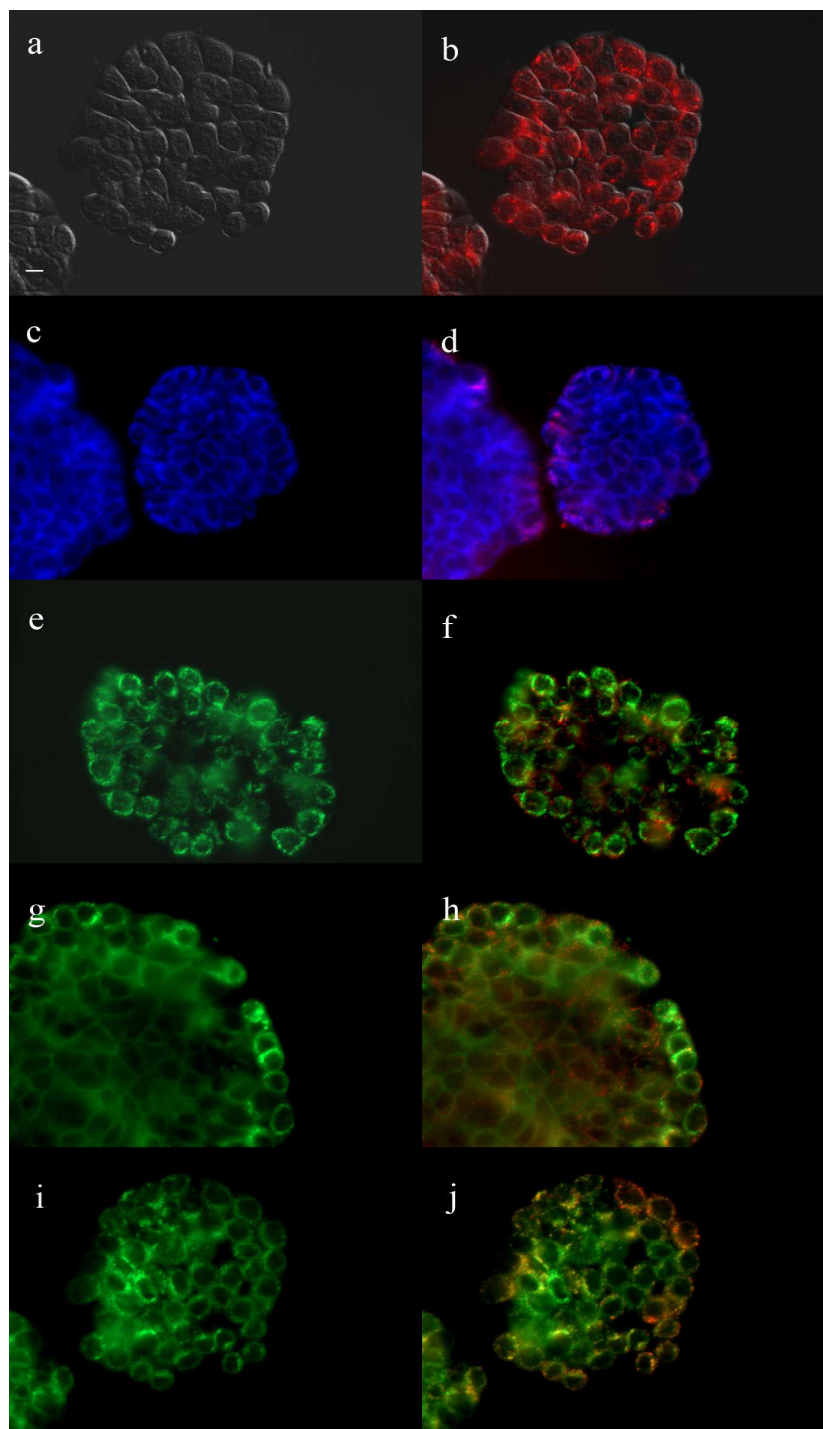

**Figure S12.** Subcellular localization of Pc **3a** in HT-29 cells at 10  $\mu$ M for 6 h. (a) Phase contrast, (b) Overlay of **3a** fluorescence and phase contrast, (c) ER Tracker Blue/White fluorescence, (e) MitoTrack green fluorescence, (g) BoDIPY Ceramide, (i) LysoSensor green fluorescence, and (d, f, h, j) overlays of organelle tracers with **3a** fluorescence. Scale bar: 10  $\mu$ m.

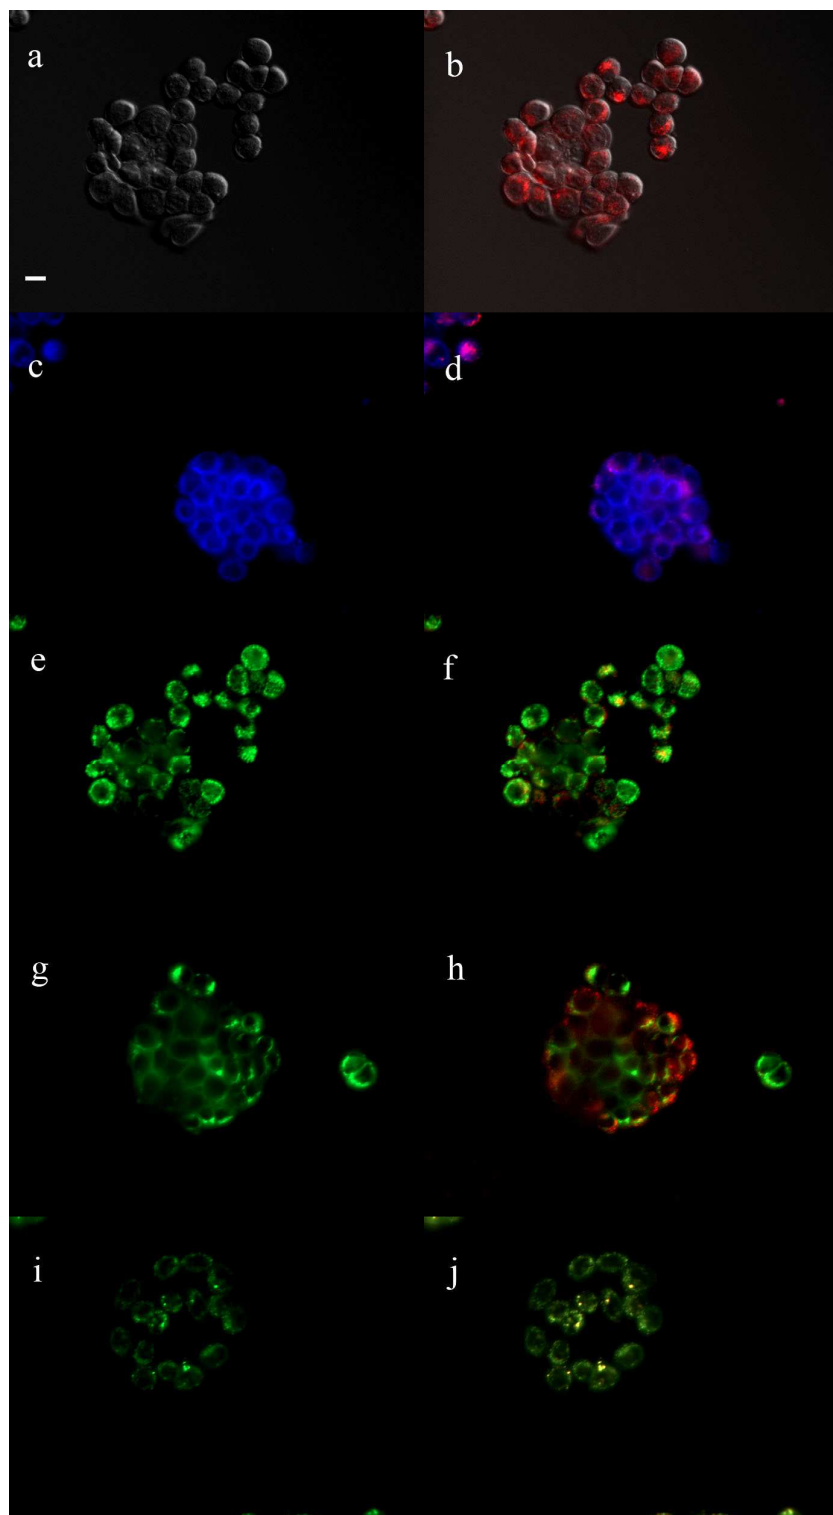

**Figure S13.** Subcellular localization of Pc **6a** in HT-29 cells at 10  $\mu$ M for 6 h. (a) Phase contrast, (b) Overlay of **6a** fluorescence and phase contrast, (c) ER Tracker Blue/White fluorescence, (e) MitoTrack green fluorescence, (g) BoDIPY Ceramide, (i) LysoSensor green fluorescence, and (d, f, h, j) overlays of organelle tracers with **6a** fluorescence. Scale bar: 10  $\mu$ m.

## Subcellular fluorescence of Pcs in Tumor cells

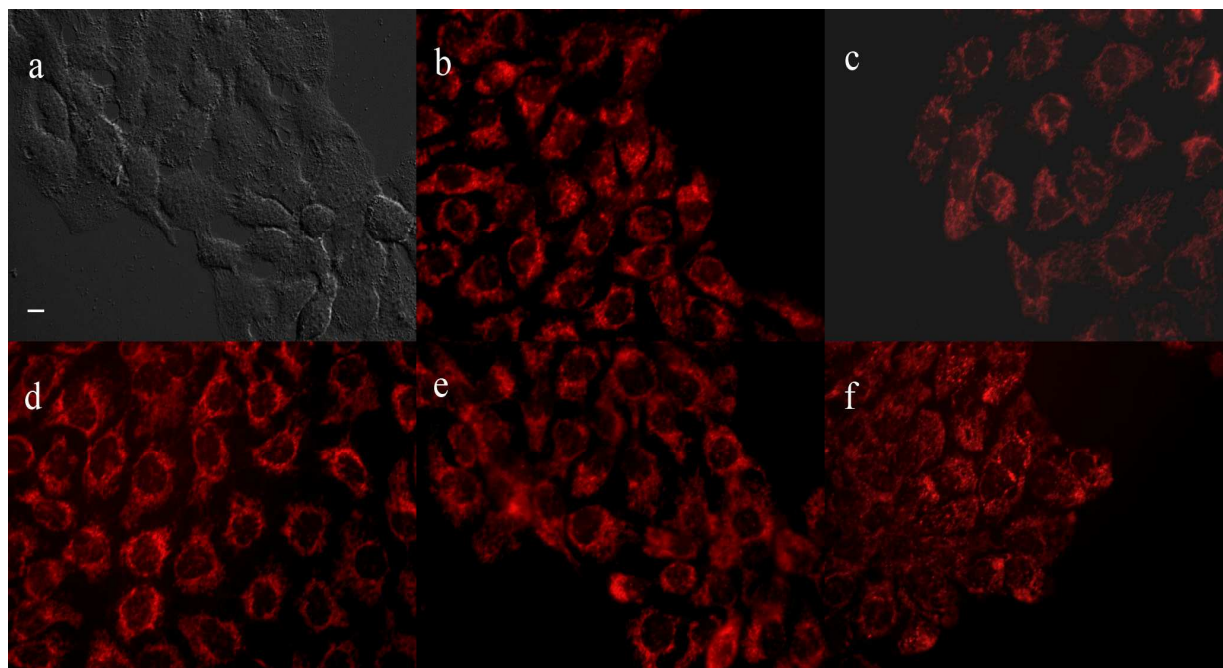

**Figure S14.** Subcellular fluorescence of Pcs in A431 cells at 10  $\mu\text{M}$  for 6 h. (a) Phase contrast, (b) Pc 3a, (c) Pc 4b, (d) Pc 6a, (e) Pc 5a, (f) Pc 5b. Scale bar: 10  $\mu\text{m}$ .

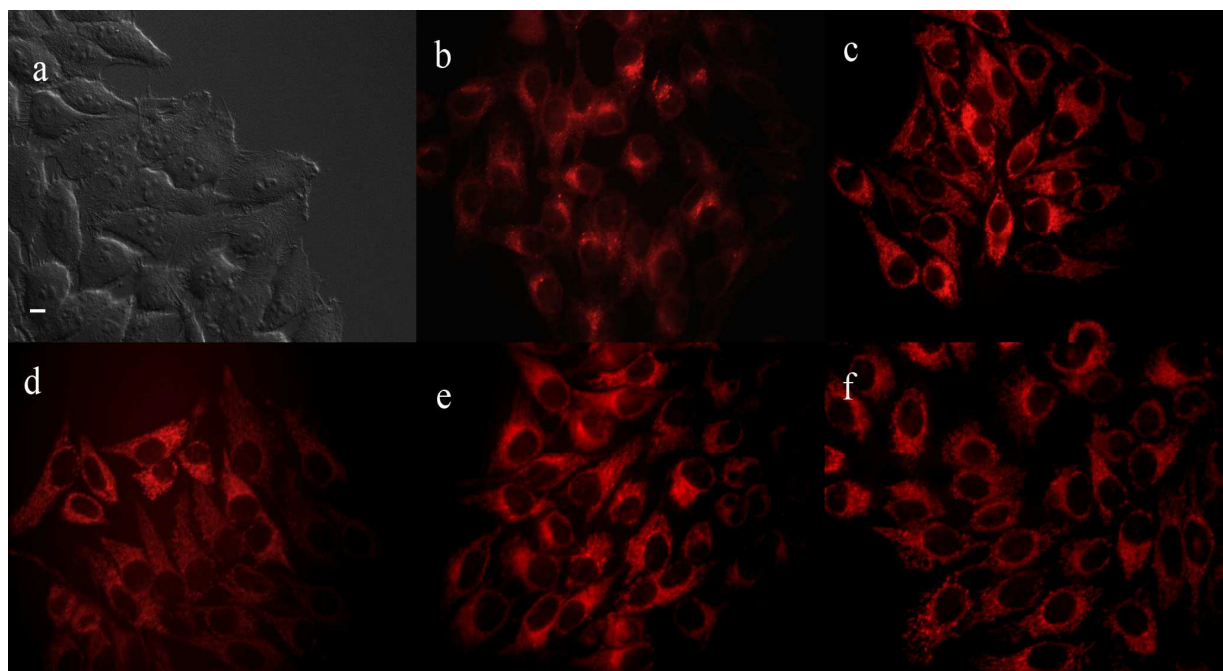

**Figure S15.** Subcellular fluorescence of Pcs in HEp2 cells at 10  $\mu\text{M}$  for 6 h. (a) Phase contrast, (b) Pc 3a, (c) Pc 4b, (d) Pc 6a, (e) Pc 5a, (f) Pc 5b. Scale bar: 10  $\mu\text{m}$ .

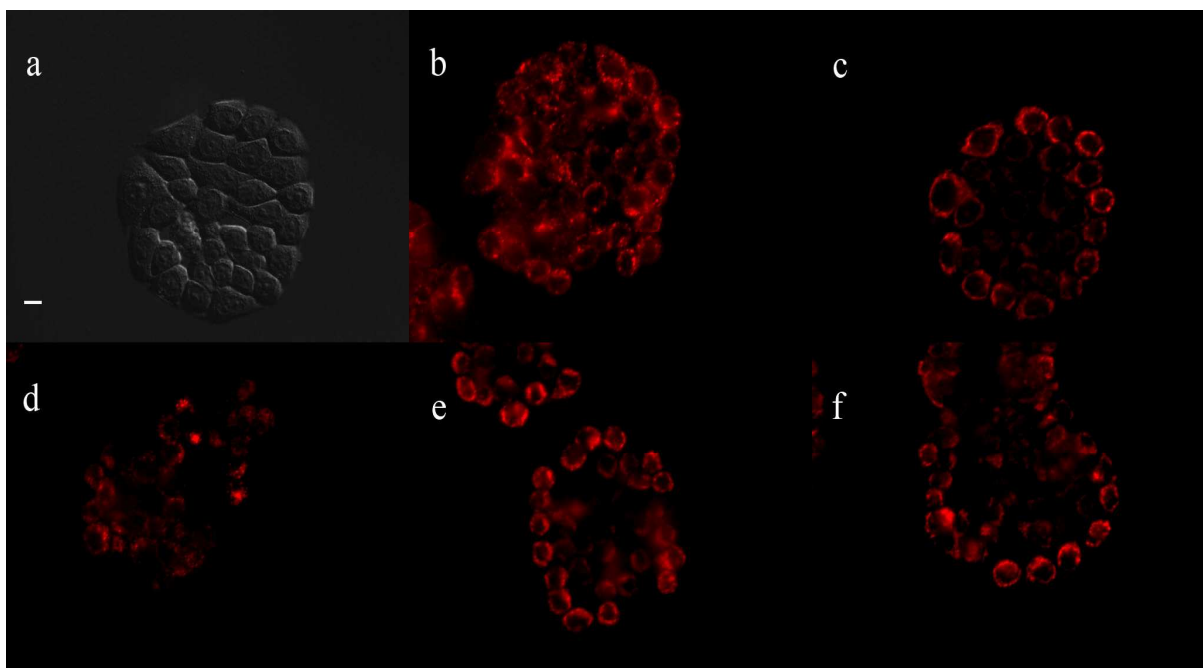

**Figure S16.** Subcellular fluorescence of Pcs in HT-29 cells at 10  $\mu\text{M}$  for 6 h. (a) Phase contrast, (b) Pc **3a**, (c) Pc **4b**, (d) Pc **6a**, (e) Pc **5a**, (f) Pc **5b**. Scale bar: 10  $\mu\text{m}$ .



## HPLC Traces, Absorption and Emission Spectra for Pc-conjugates

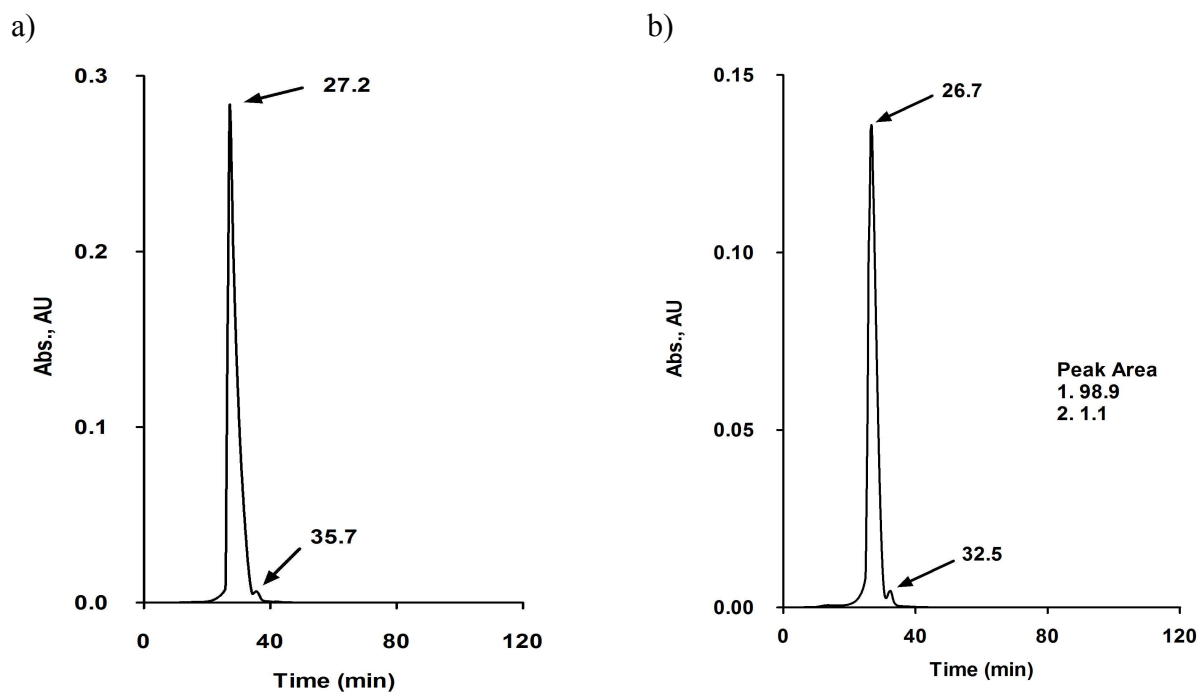

Figure S17. HPLC spectra for (a) Pc-conjugate 5a and, (b) Pc-conjugate 5b.

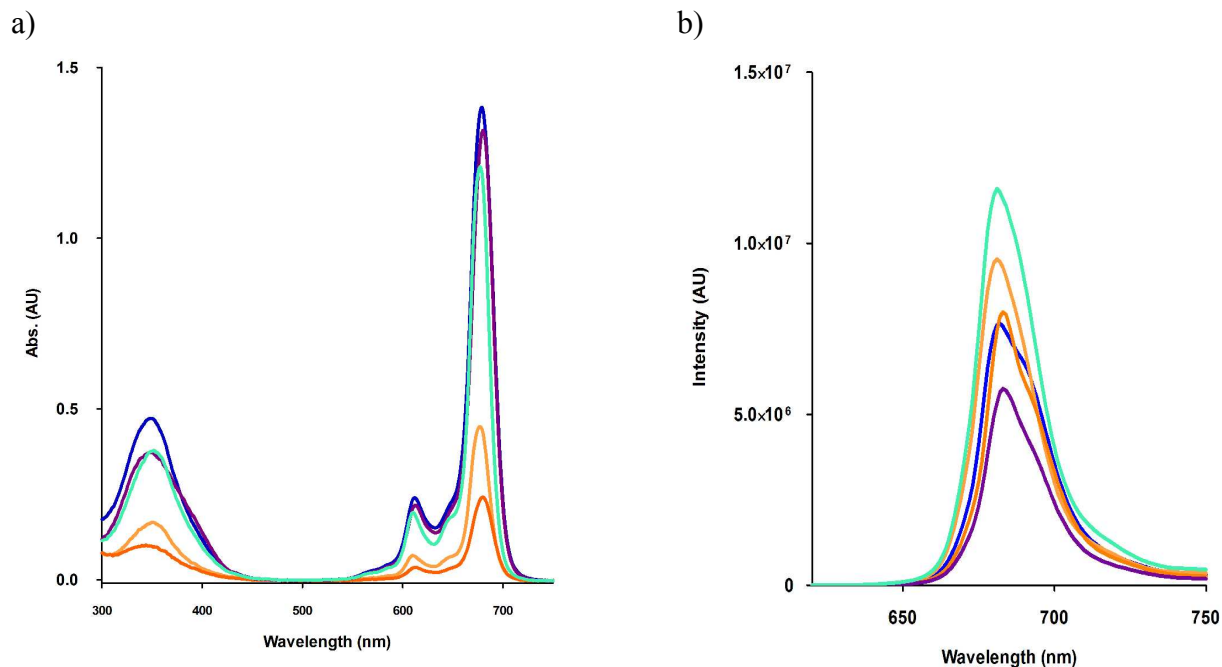

Figure S18. (a) Absorption spectra for Pc conjugates at 8.0  $\mu\text{M}$  and, (b) Emission spectra for Pc conjugates. Pc-conjugates 3a (blue), Pc 4b (tangerine), Pc 6a (red), Pc 5a (purple), and Pc 5b (turquoise) in DMF.

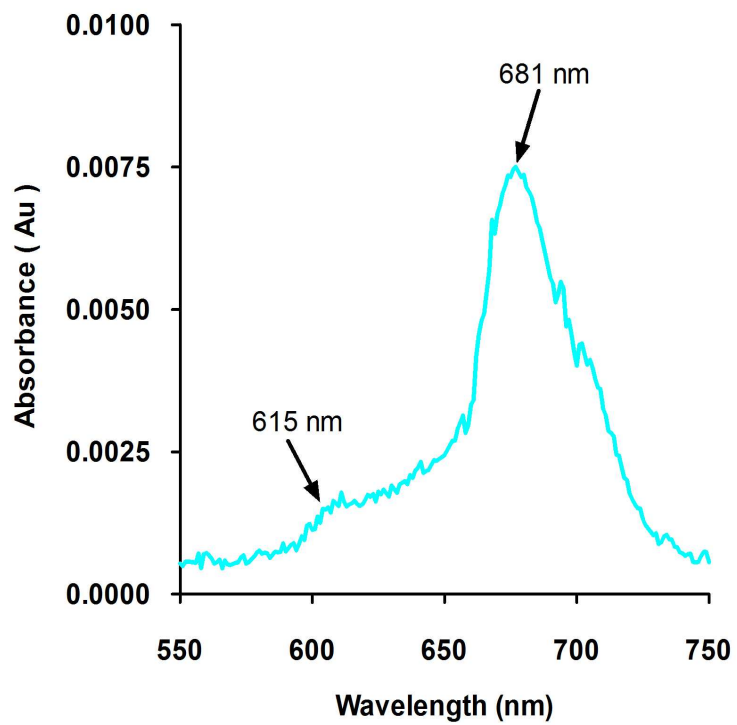

**Figure S19.** Absorption spectrum for Pc **5b** conjugate in methanol, extracted from HT-29 mice-tumor.

## Dark-toxicity and Phototoxicity in cells

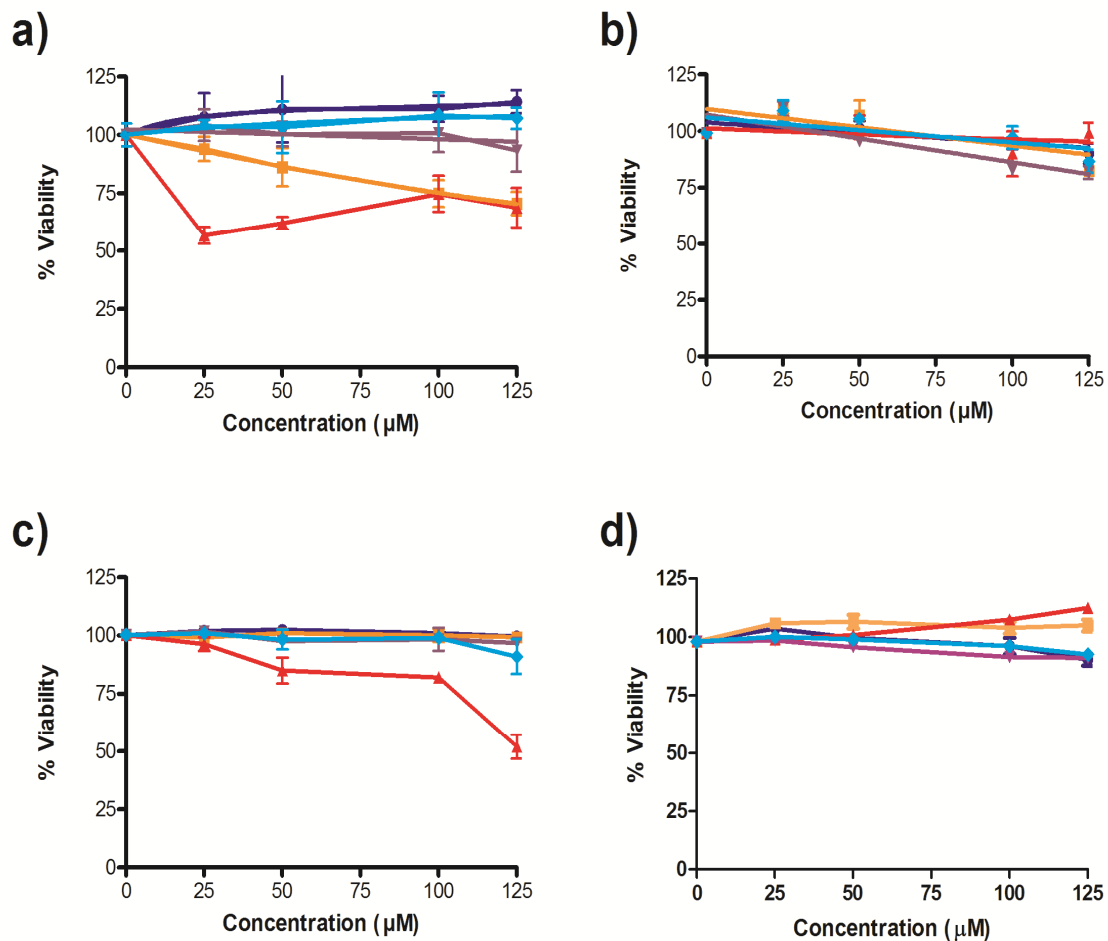

**Figure S20.** Dark toxicity of conjugates Pc 3a (blue), Pc 4b (tangerine), Pc 6a (red), Pc 5a (purple), and Pc 5b (turquoise) at 10 µM toward (a) A431, (b) Vero, (c) HEP2 and (d) HT-29 cells, using the Cell Titer Blue assay.

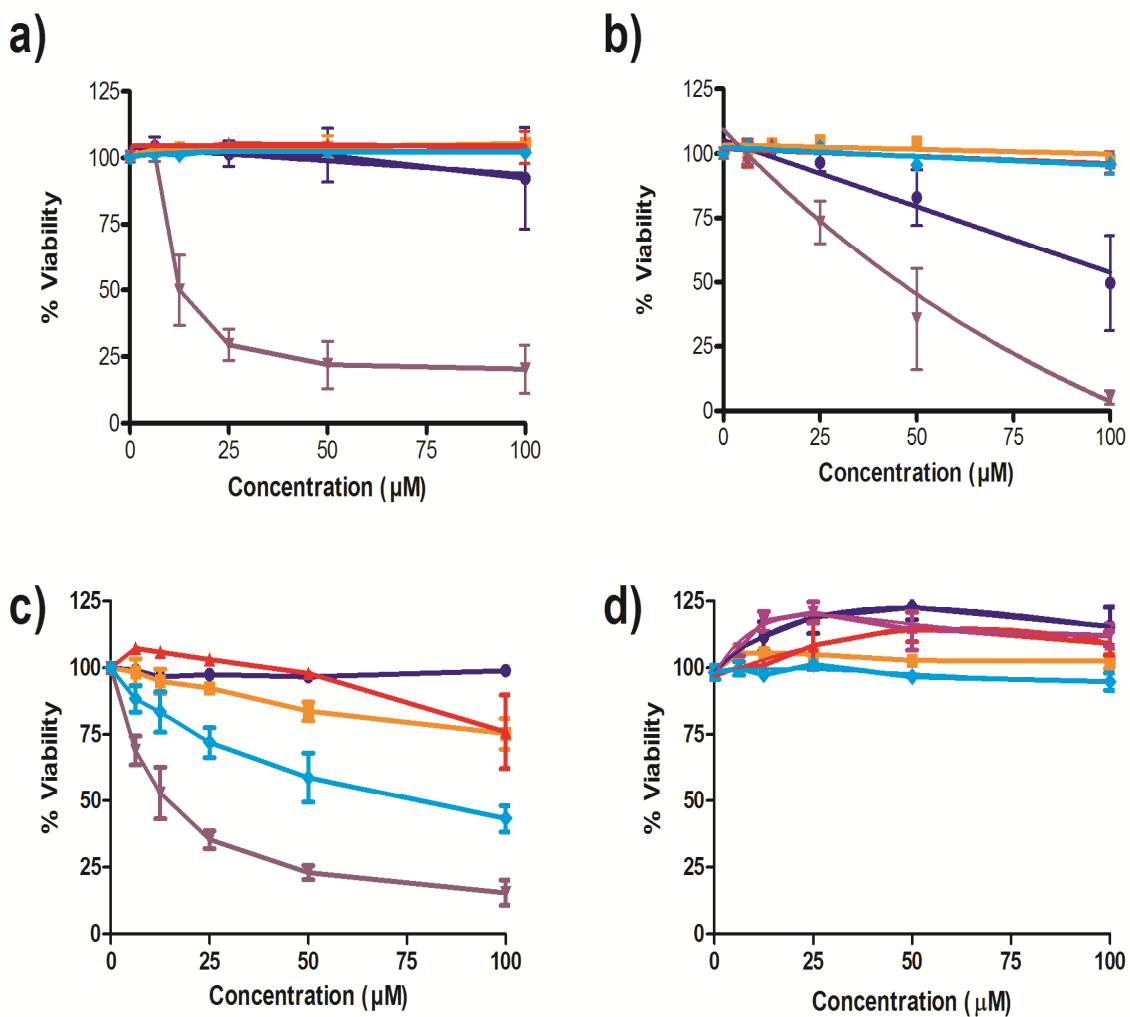

**Figure S21.** Phototoxicity of conjugates Pc 3a (blue), Pc 4b (tangerine), Pc 6a (red), Pc 5a (purple), and Pc 5b (turquoise) at 10 μM toward (a) A431, (b) Vero, (c) HEP2 and (d) HT-29 cells, using the Cell Titer Blue assay.

## Mass Spectra for Pcs and their Conjugates

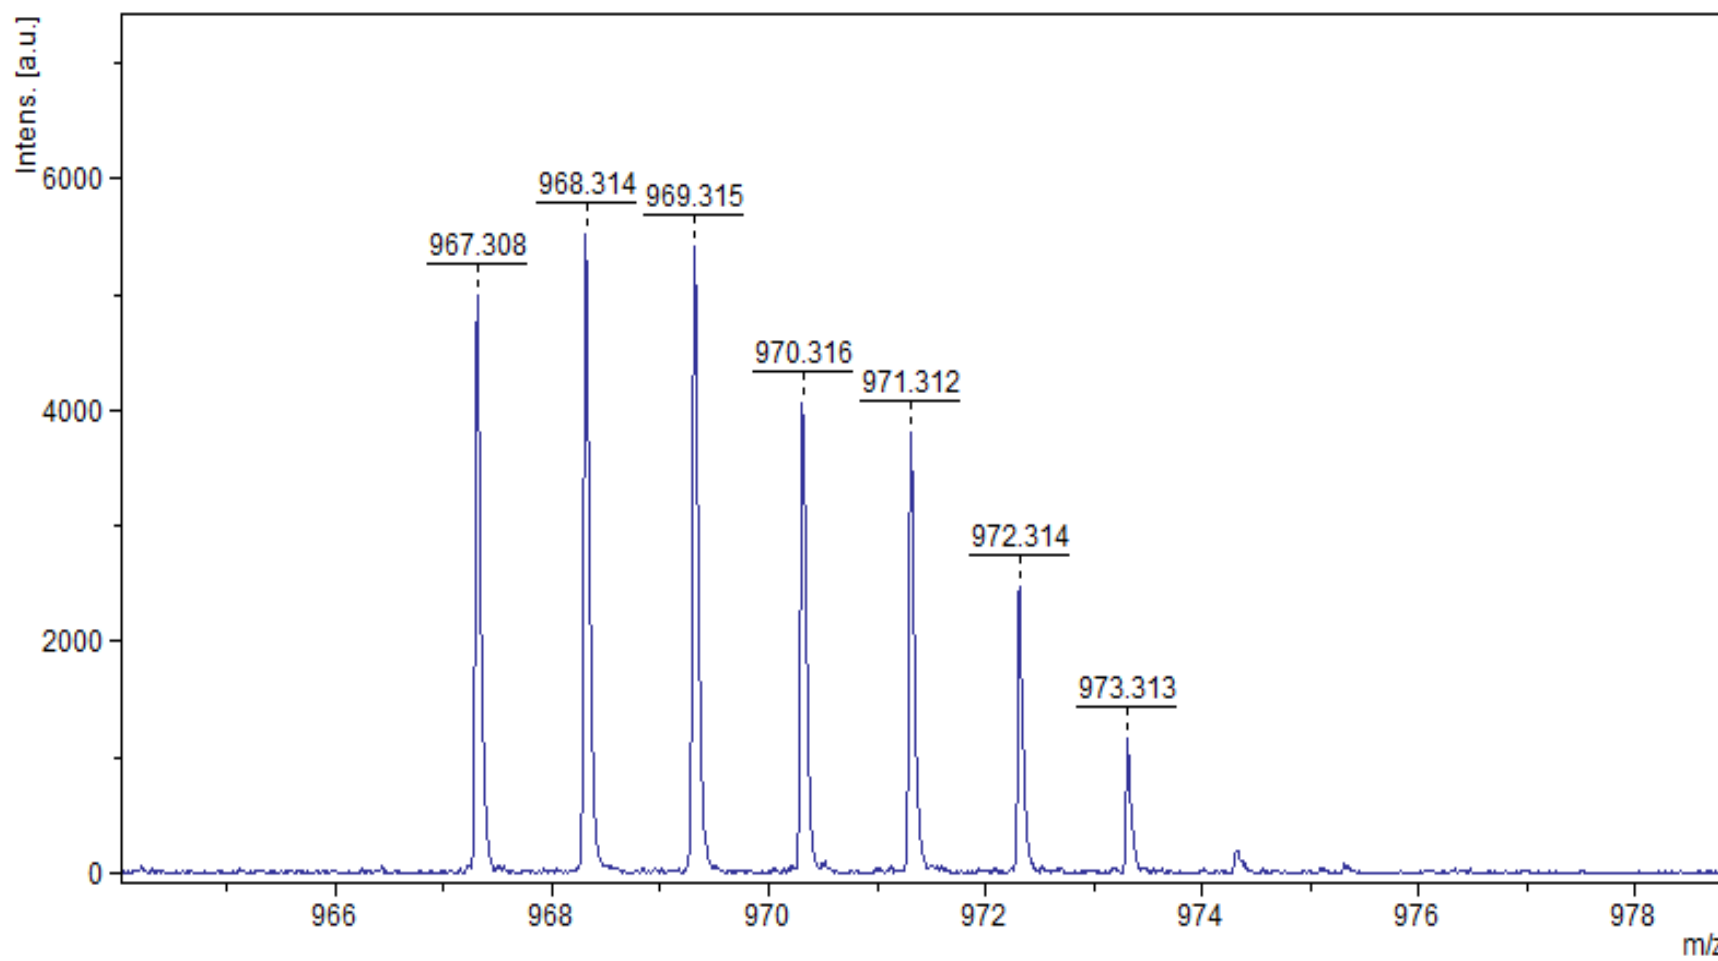

**Figure S22.** MS (MALDI-TOF) spectrum for Pc **2a**.

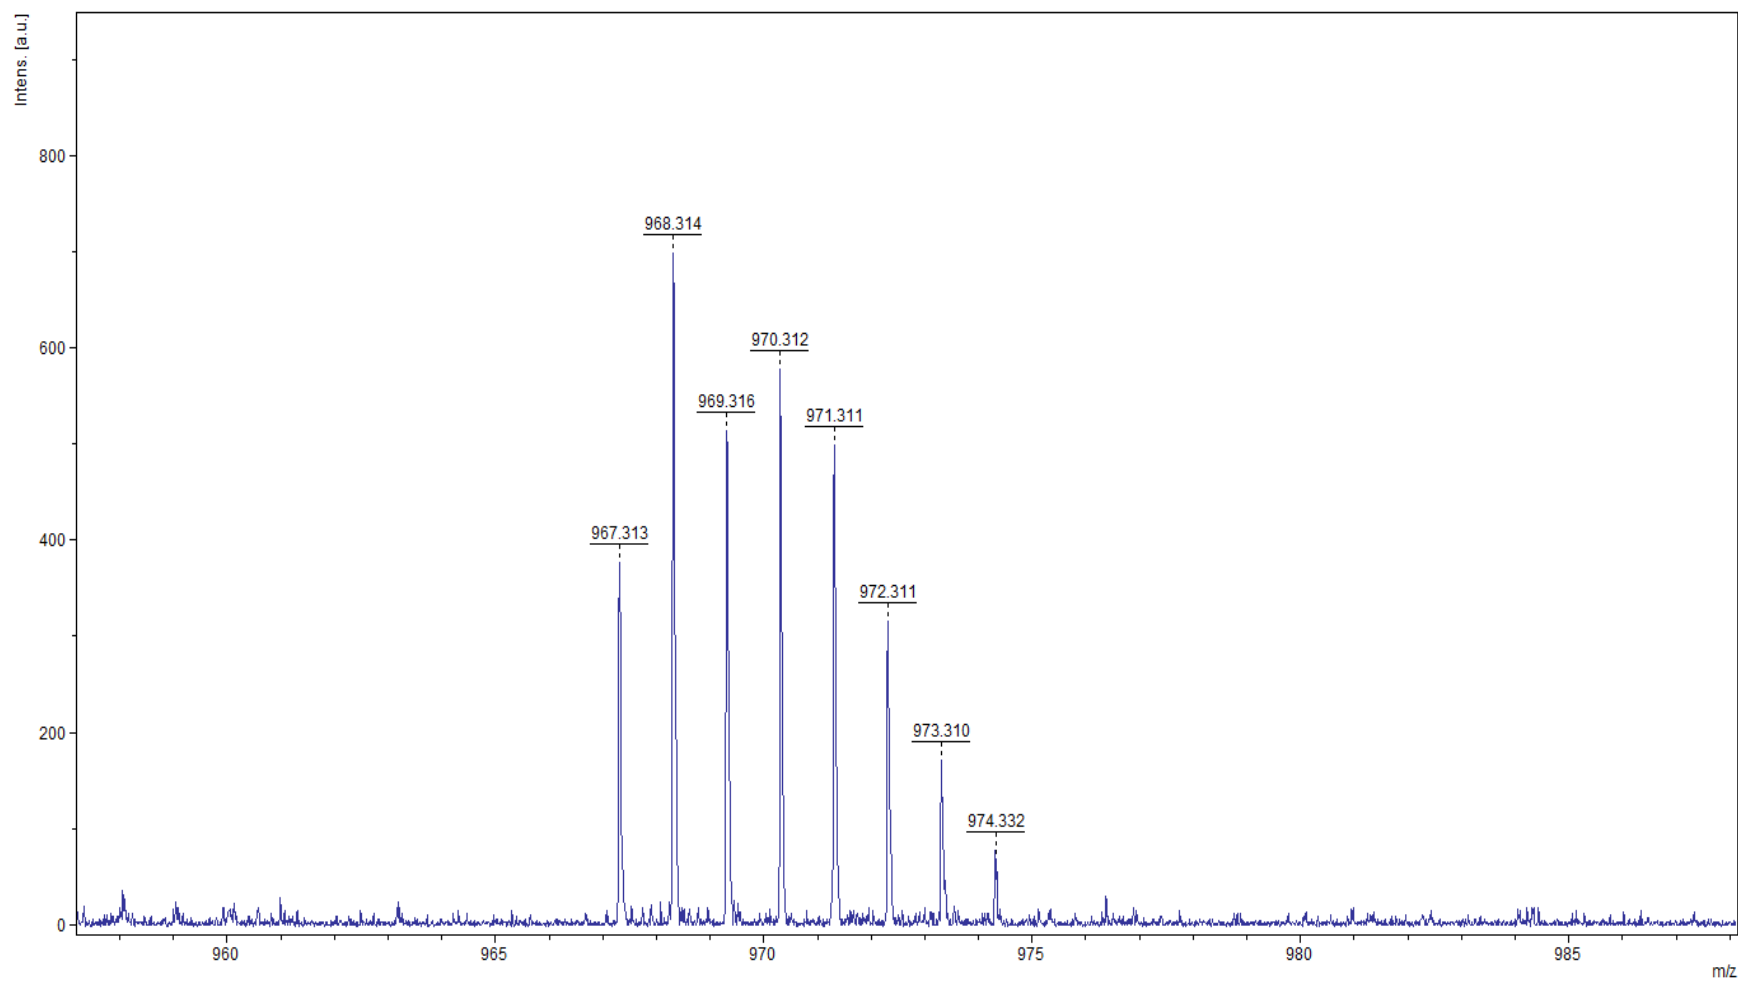

**Figure S23.** MS (MALDI-TOF) spectrum for Pc **2b**.

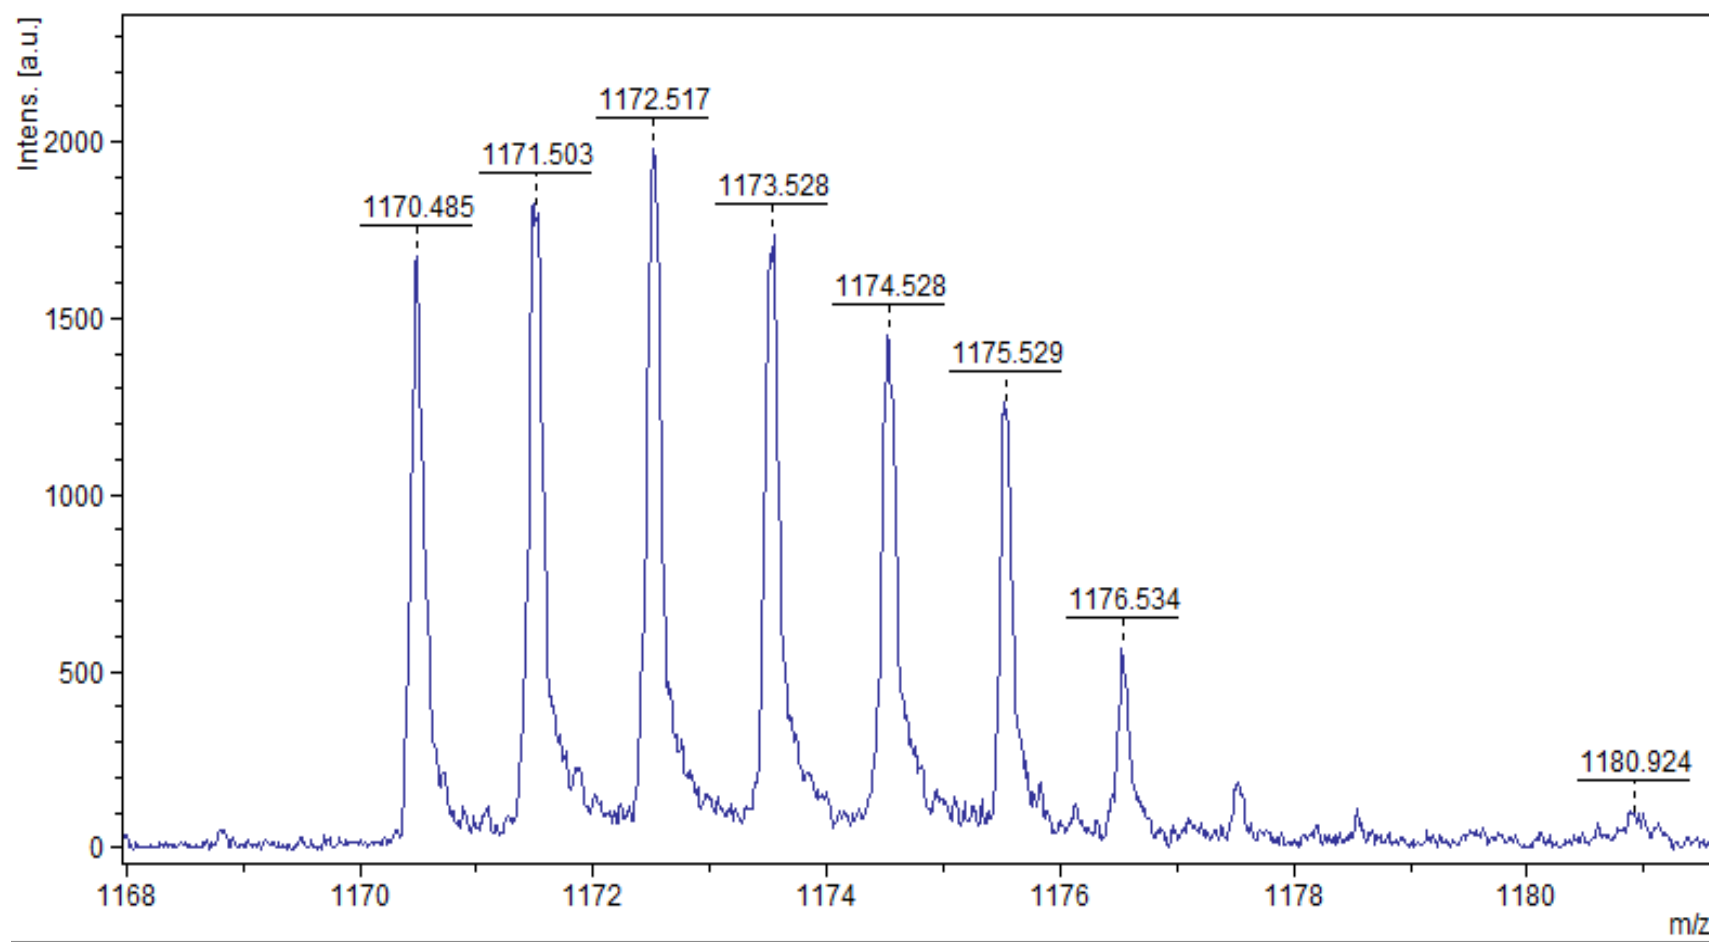

**Figure S24.** MS (MALDI-TOF) spectrum for tert-butyl protected Pc **3a**  $[M-tBu+H]^+$ .

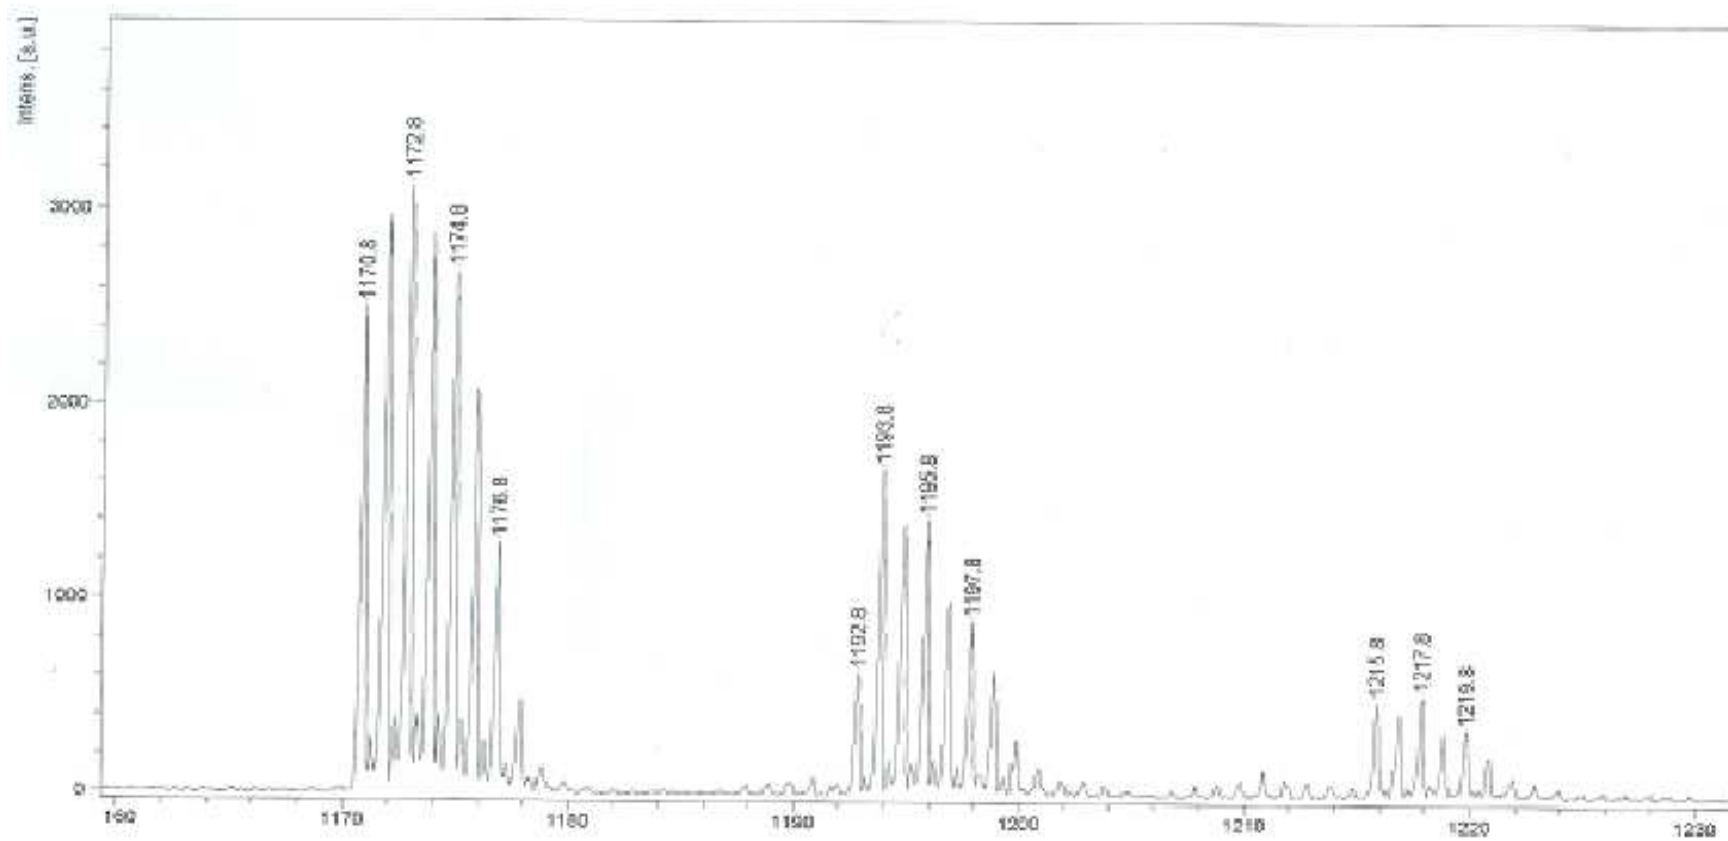

**Figure S25.** MS (MALDI-TOF) spectrum for deprotected Pc **3a**  $[M-{}^1\text{Bu}+H]^+$ .



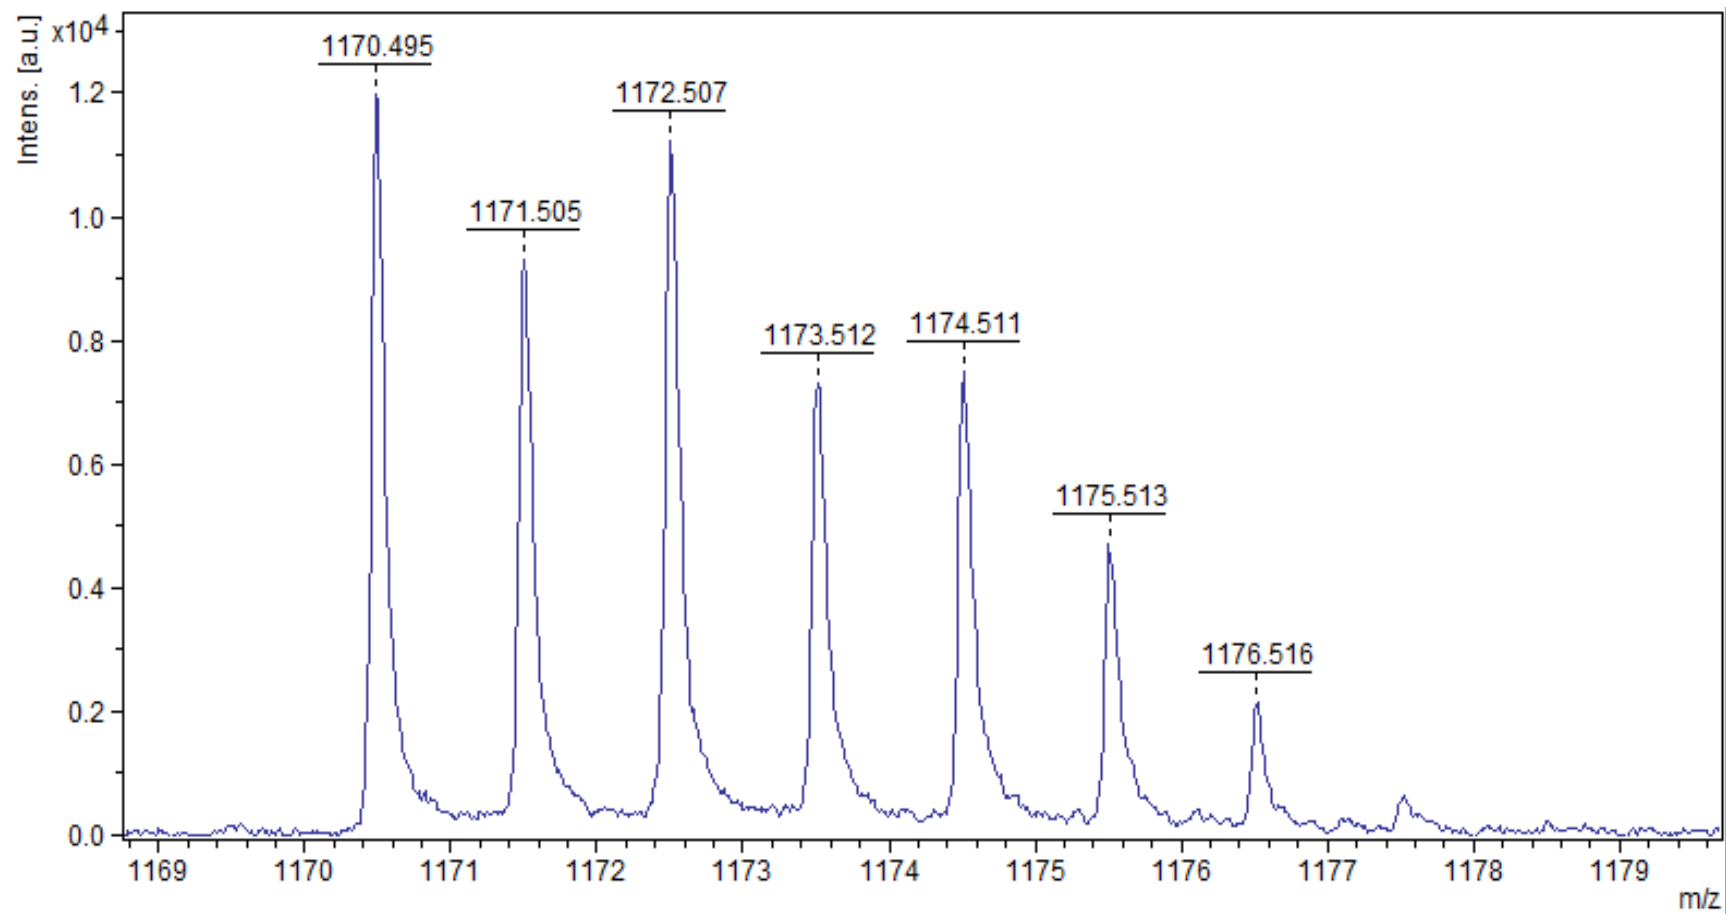

**Figure S26.** MS (MALDI-TOF) spectrum for tert-butyl protected Pc **3b** [M-<sup>t</sup>Bu+H]<sup>+</sup>.

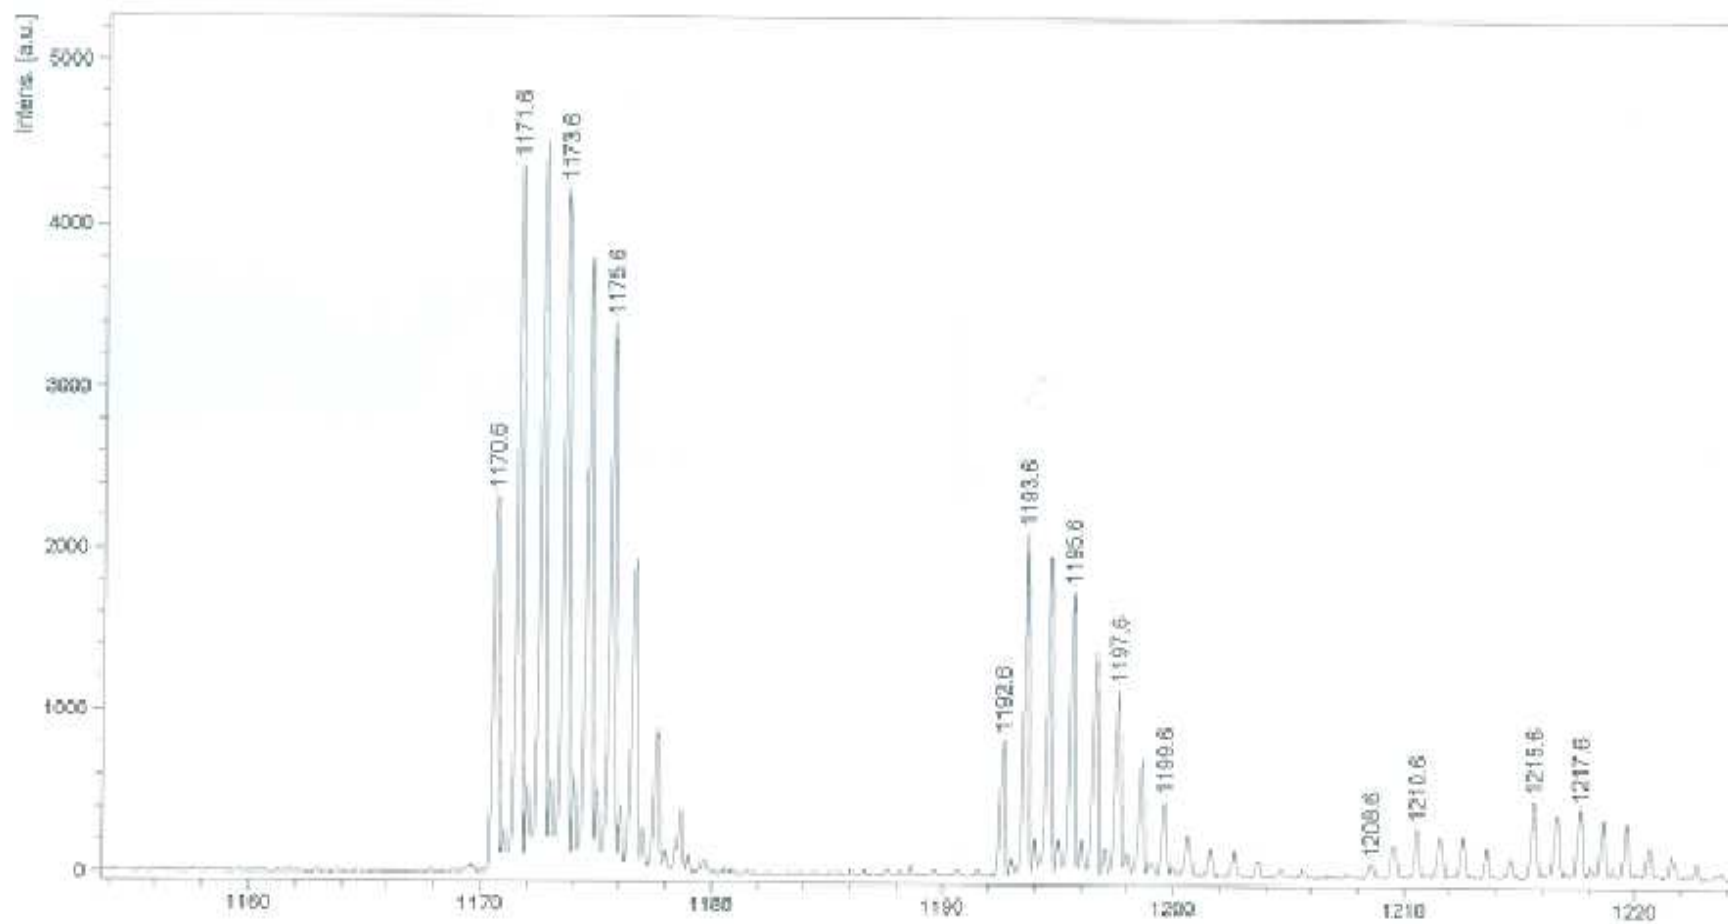

**Figure S27.** MS (MALDI-TOF) spectrum for deprotected Pc **3b**  $[M-t\text{Bu}+H]^+$ .

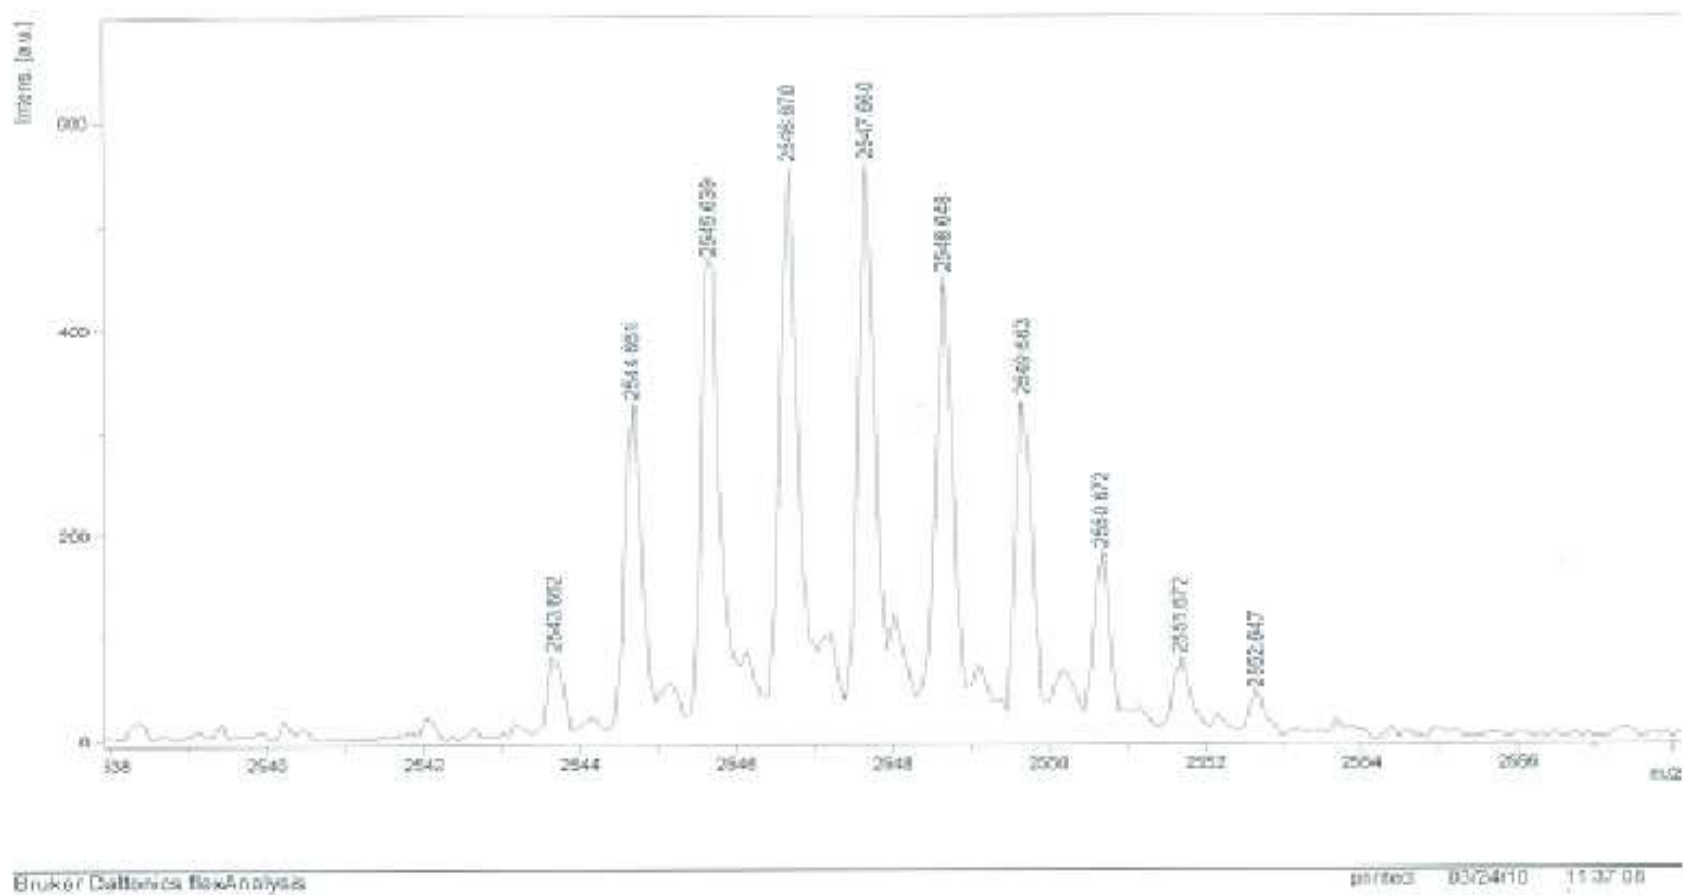

**Figure S28.** MS (MALDI-TOF) spectrum for Pc **4b** [M+H]<sup>+</sup>.

FLEXControl generated XMASS data  
(c) 2000 Bruker Daltonics

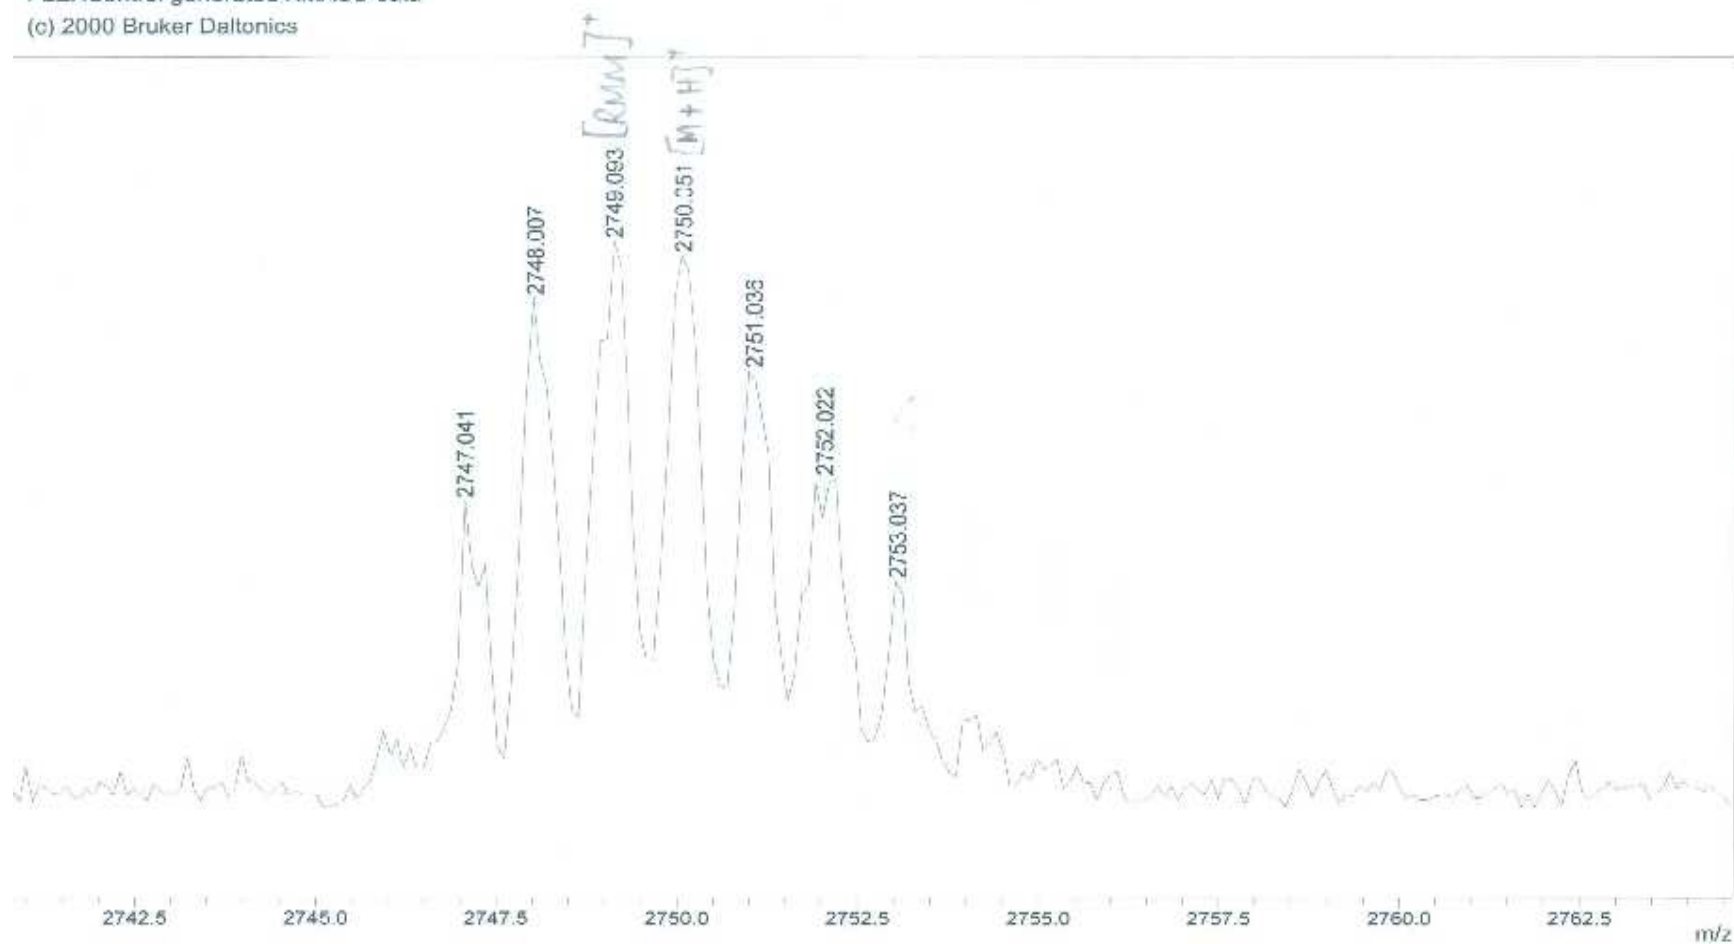

**Figure S29.** MS (MALDI-TOF) spectrum for Pc 6a [M+H]<sup>+</sup>.

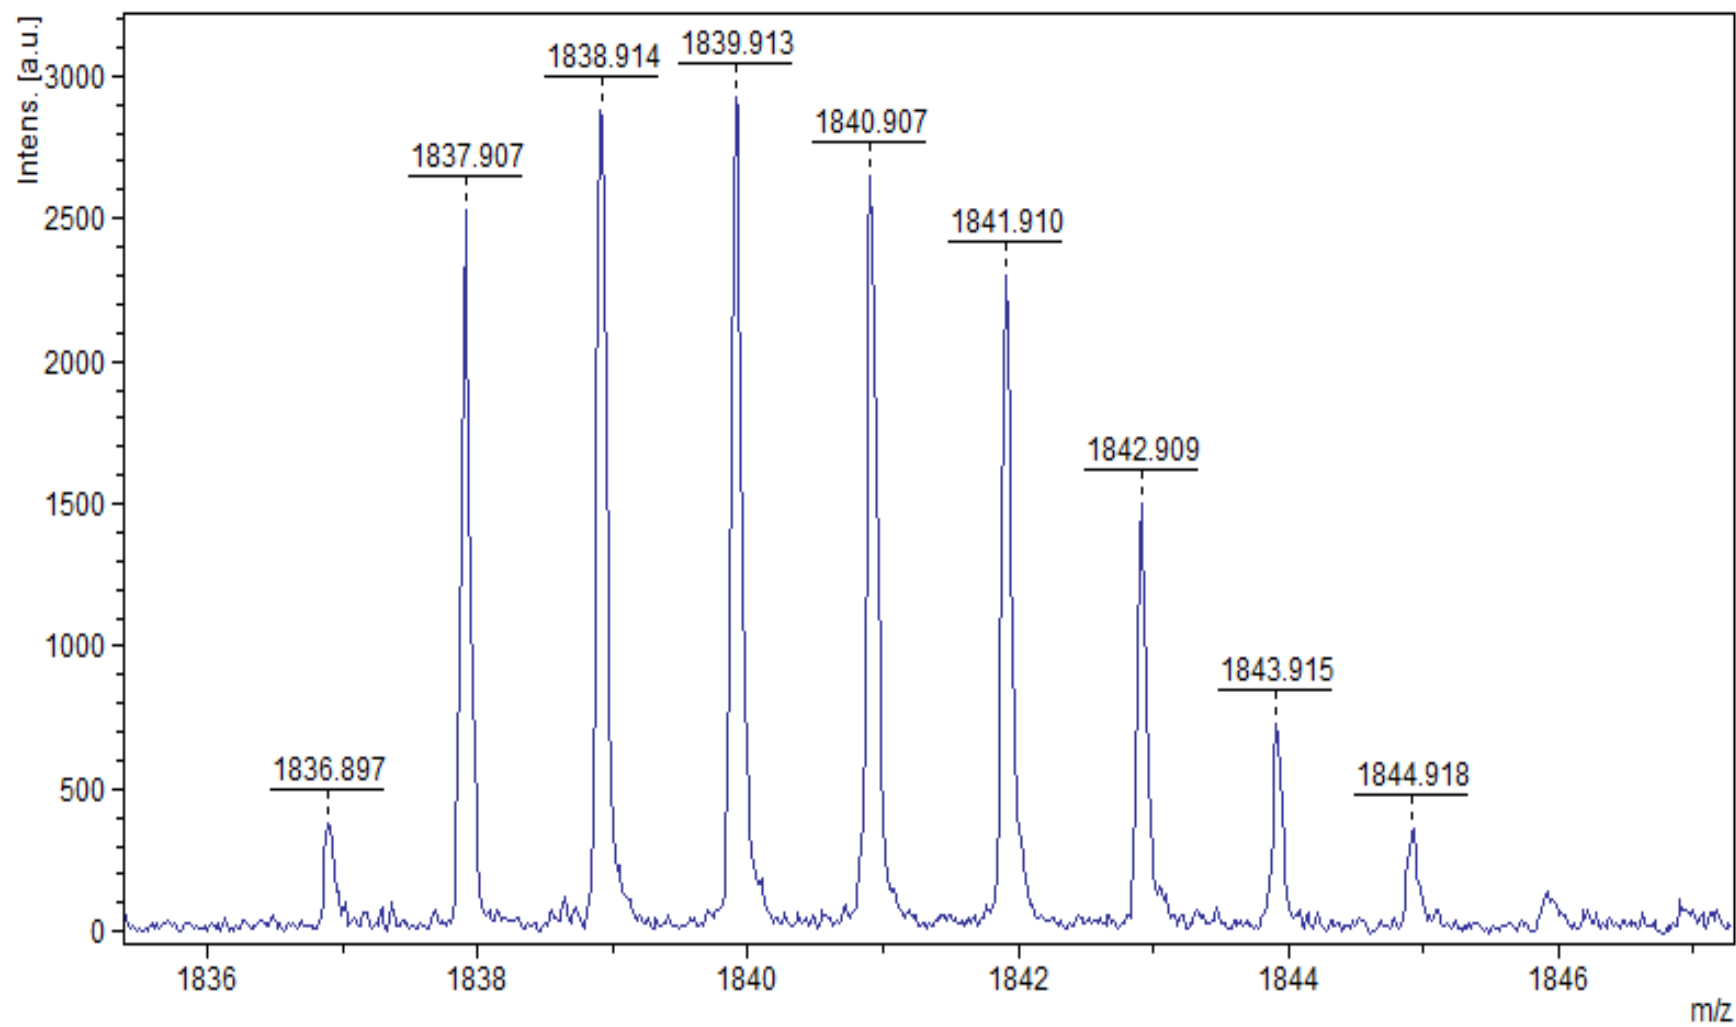

**Figure S30.** MS (MALDI-TOF) spectrum for Pc **5a**  $[M+H]^+$ .

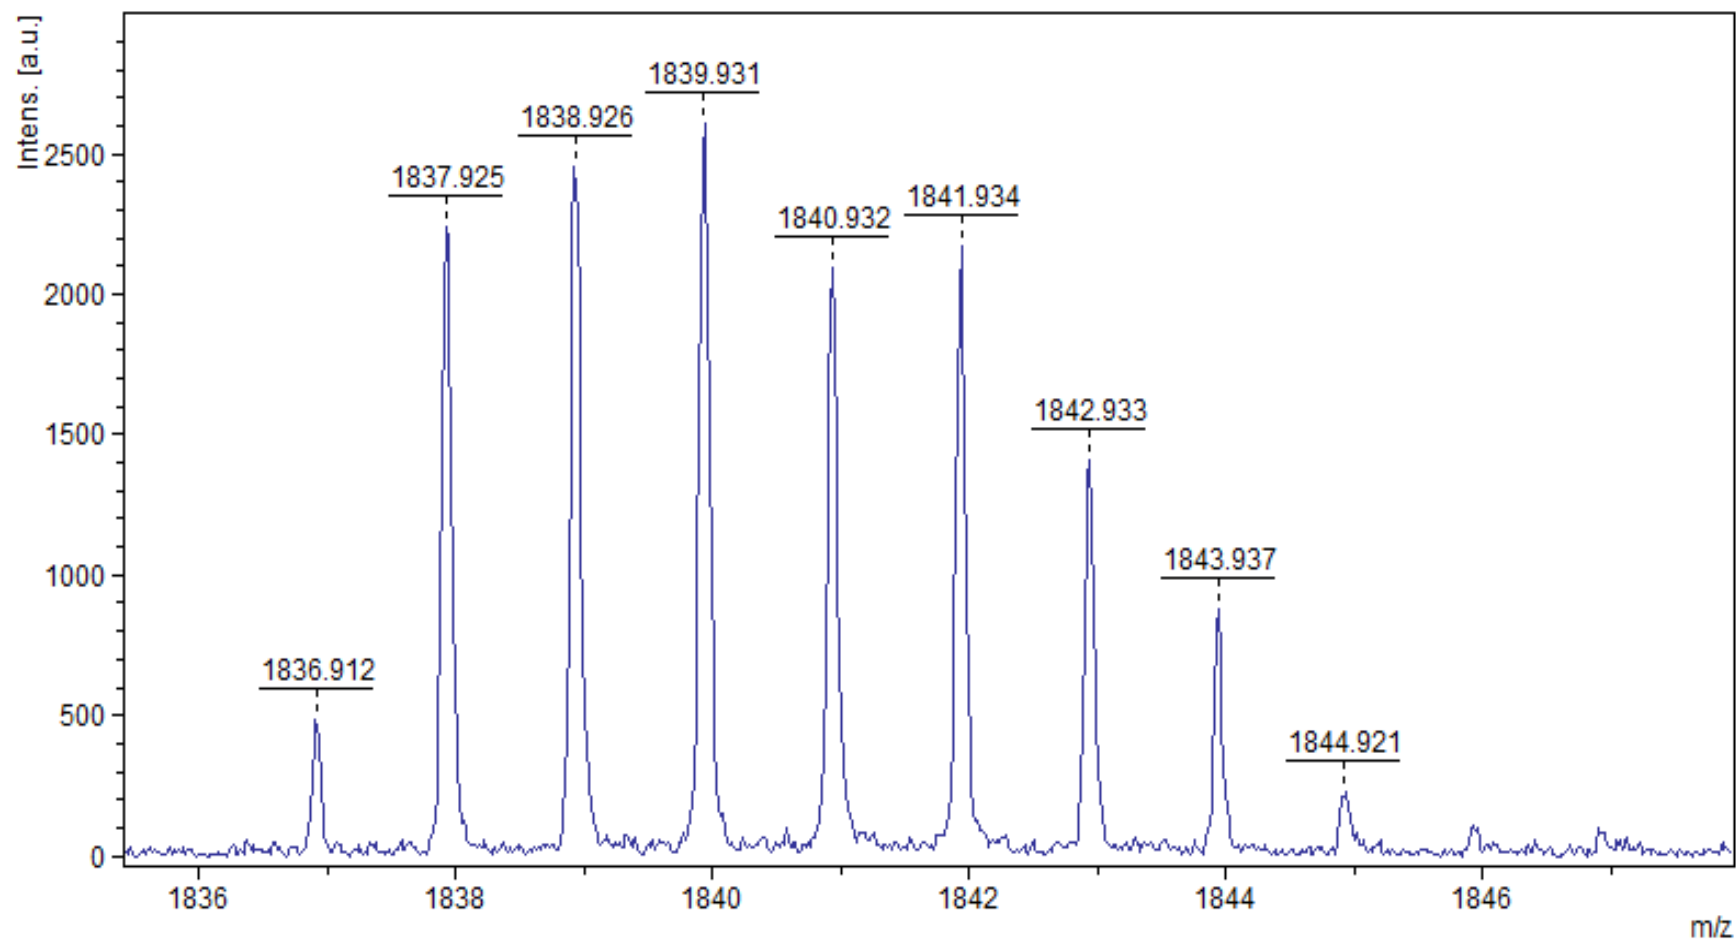

**Figure S31.** MS (MALDI-TOF) spectrum for Pc **5b** [M+H]<sup>+</sup>.

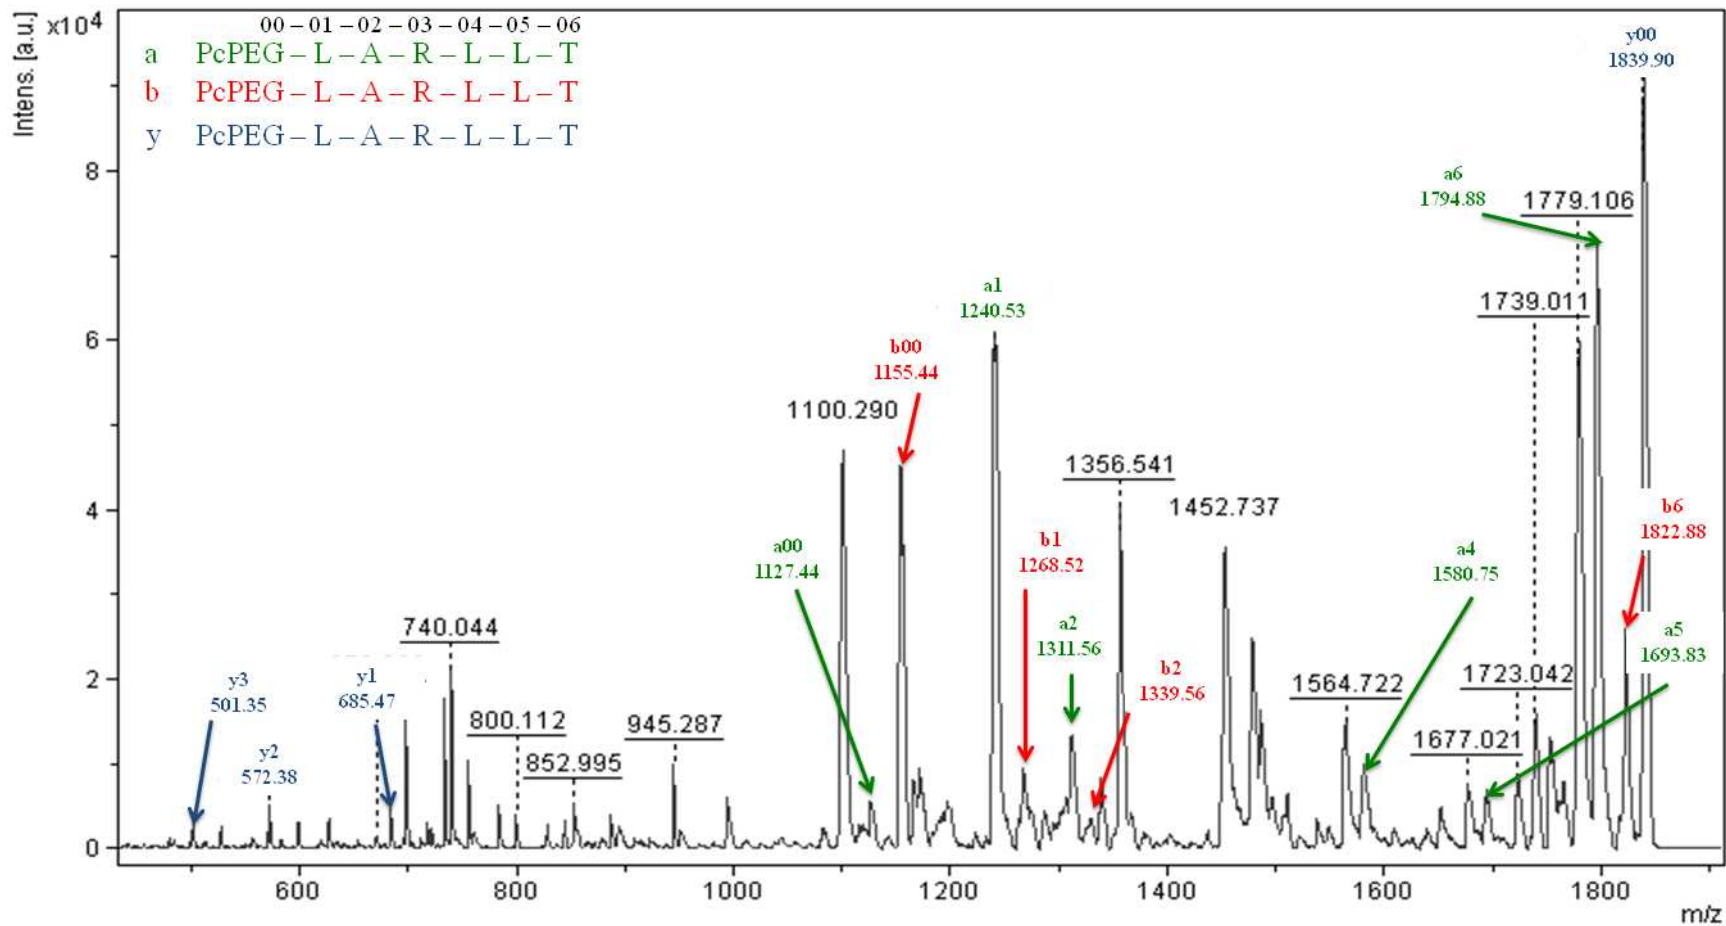

Figure S32. MALDI-TOF-TOF (MS-MS) spectrum for Pc-conjugate 5a.

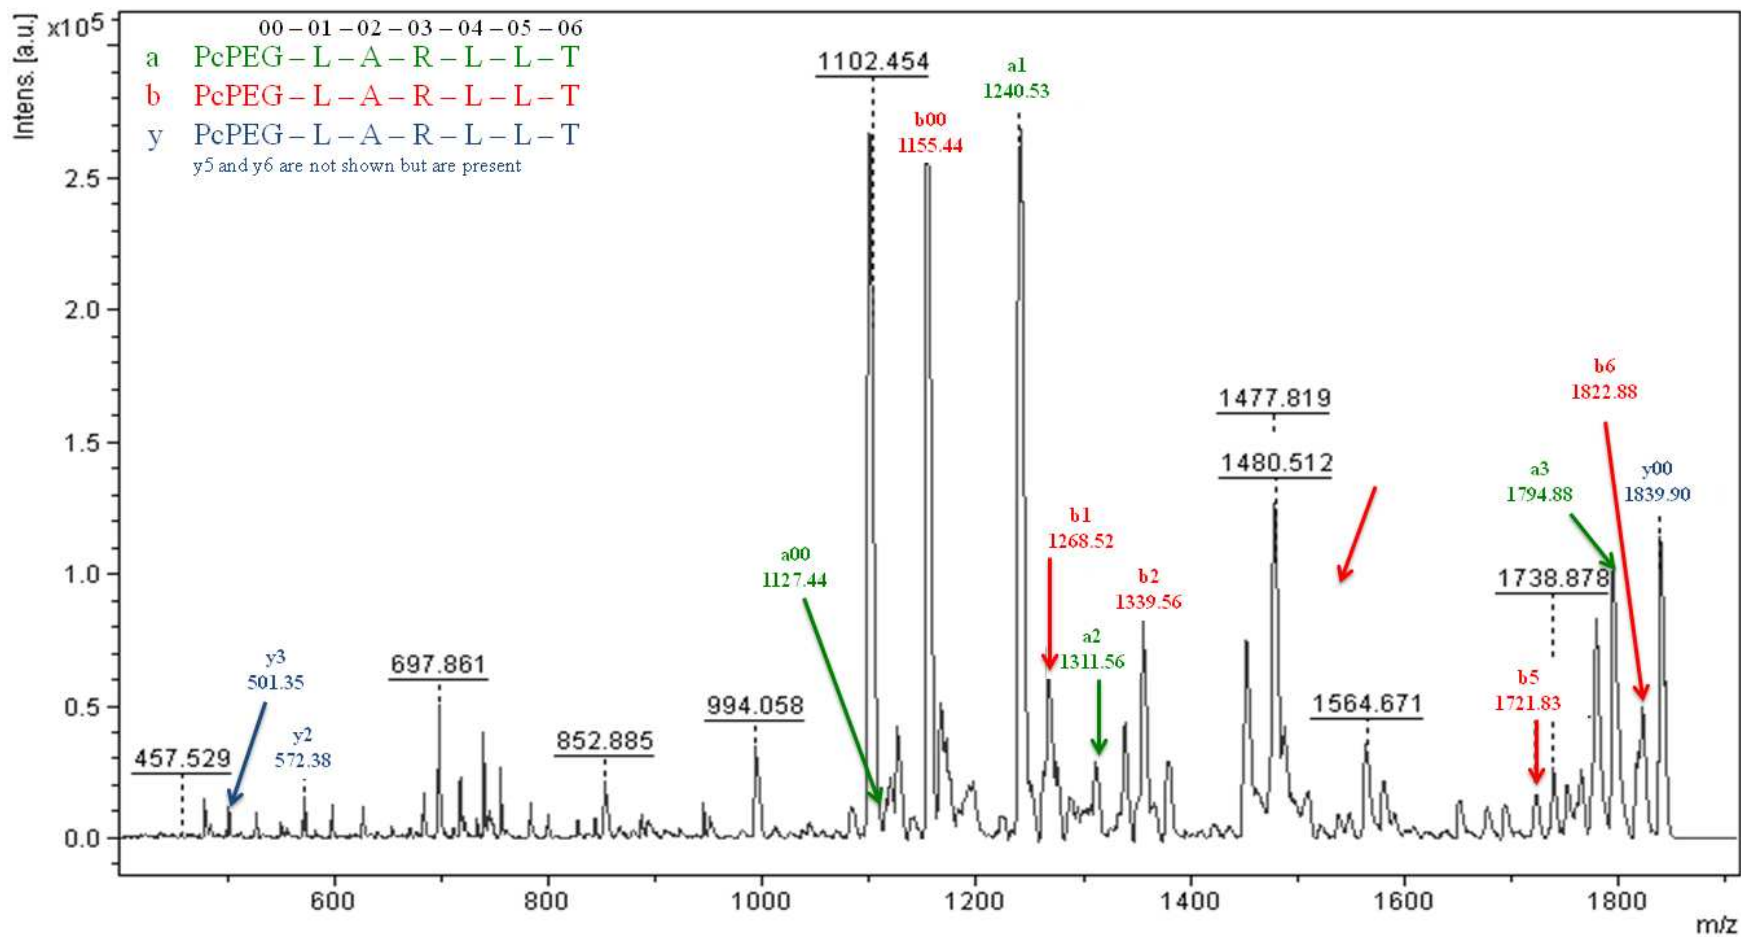

Figure S33. MALDI-TOF-TOF (MS-MS) spectrum for Pc-conjugate **5b**



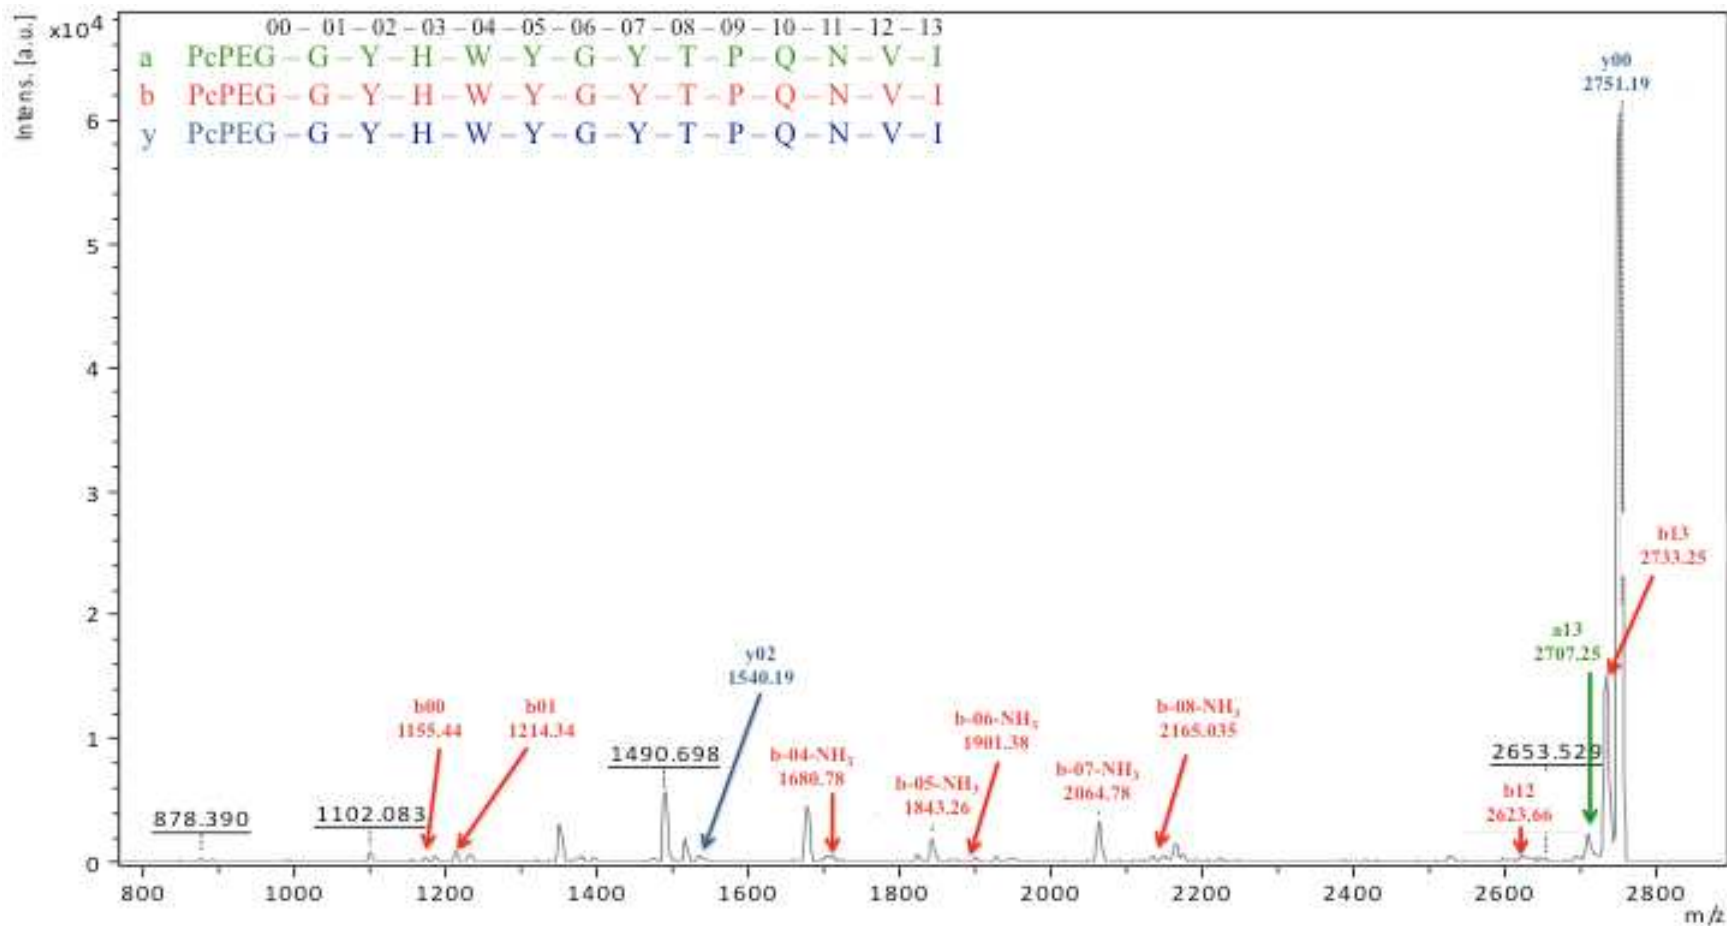

Figure S34. MALDI-TOF-TOF (MS-MS) spectrum for Pc-conjugate 6a

# $^1\text{H}$ NMR and $^{13}\text{C}$ NMR Spectra for Pcs and their Conjugates

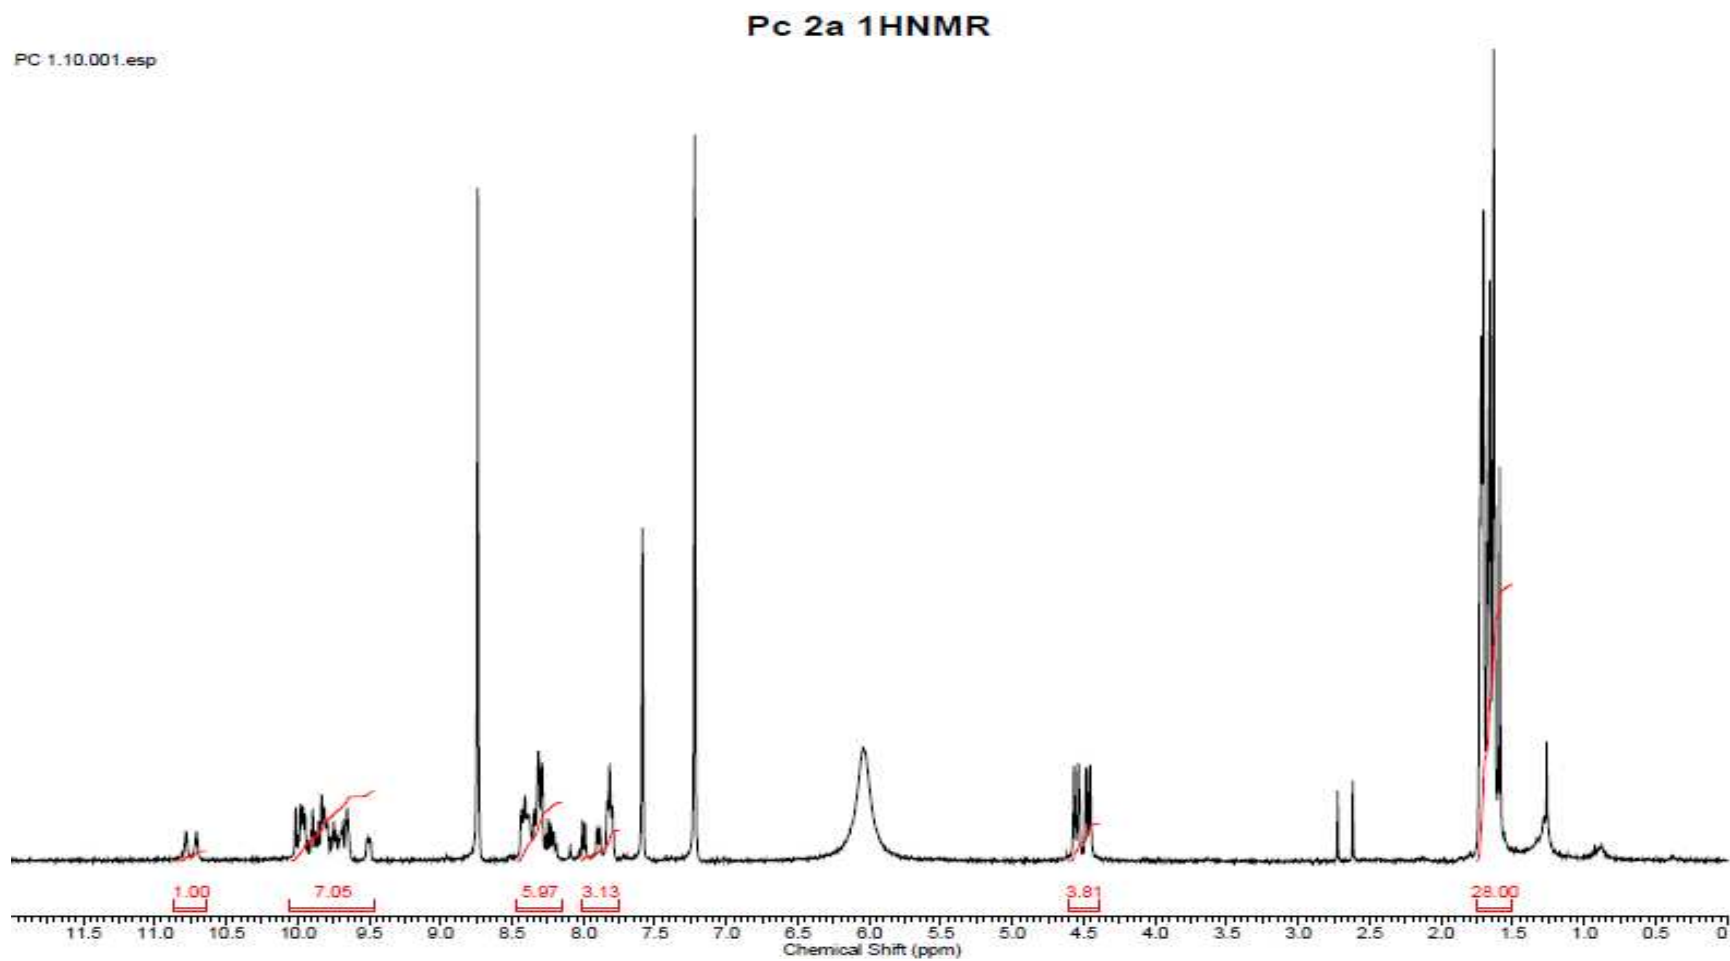

Figure S35.  $^1\text{H}$ NMR spectrum for Pc 2a

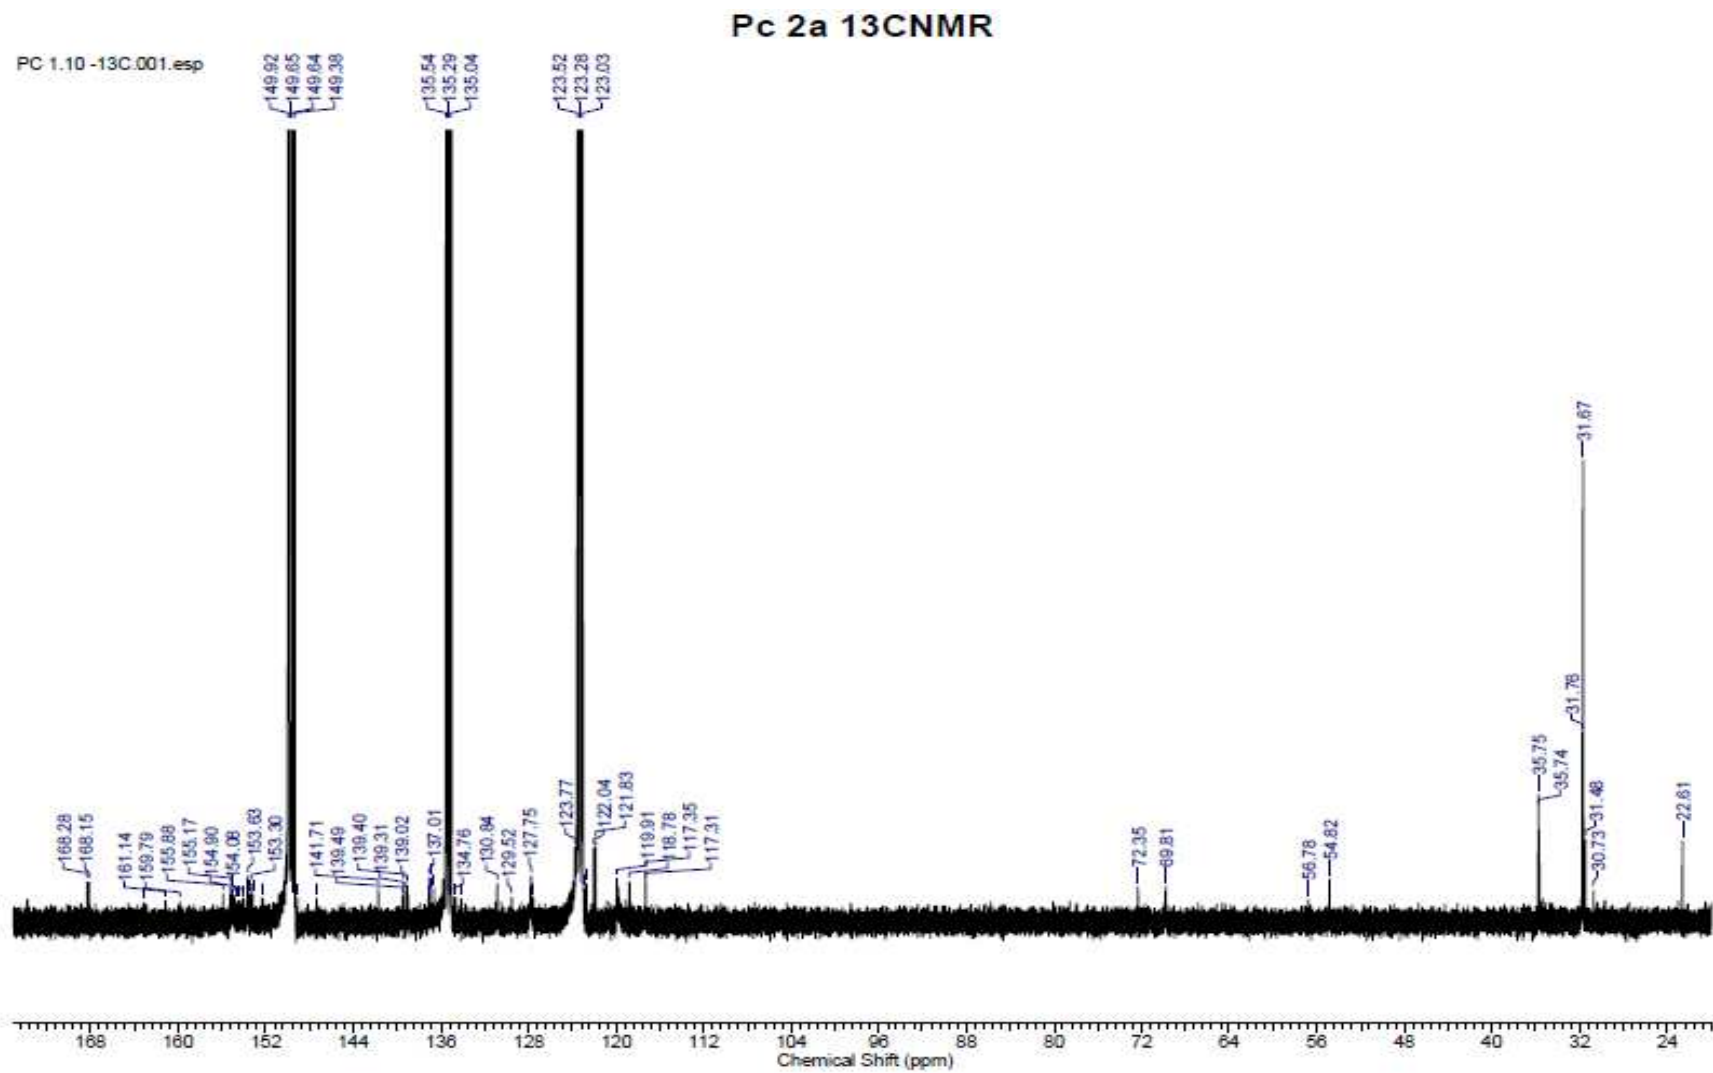

Figure S36. <sup>13</sup>CNMR spectrum for Pc 2a

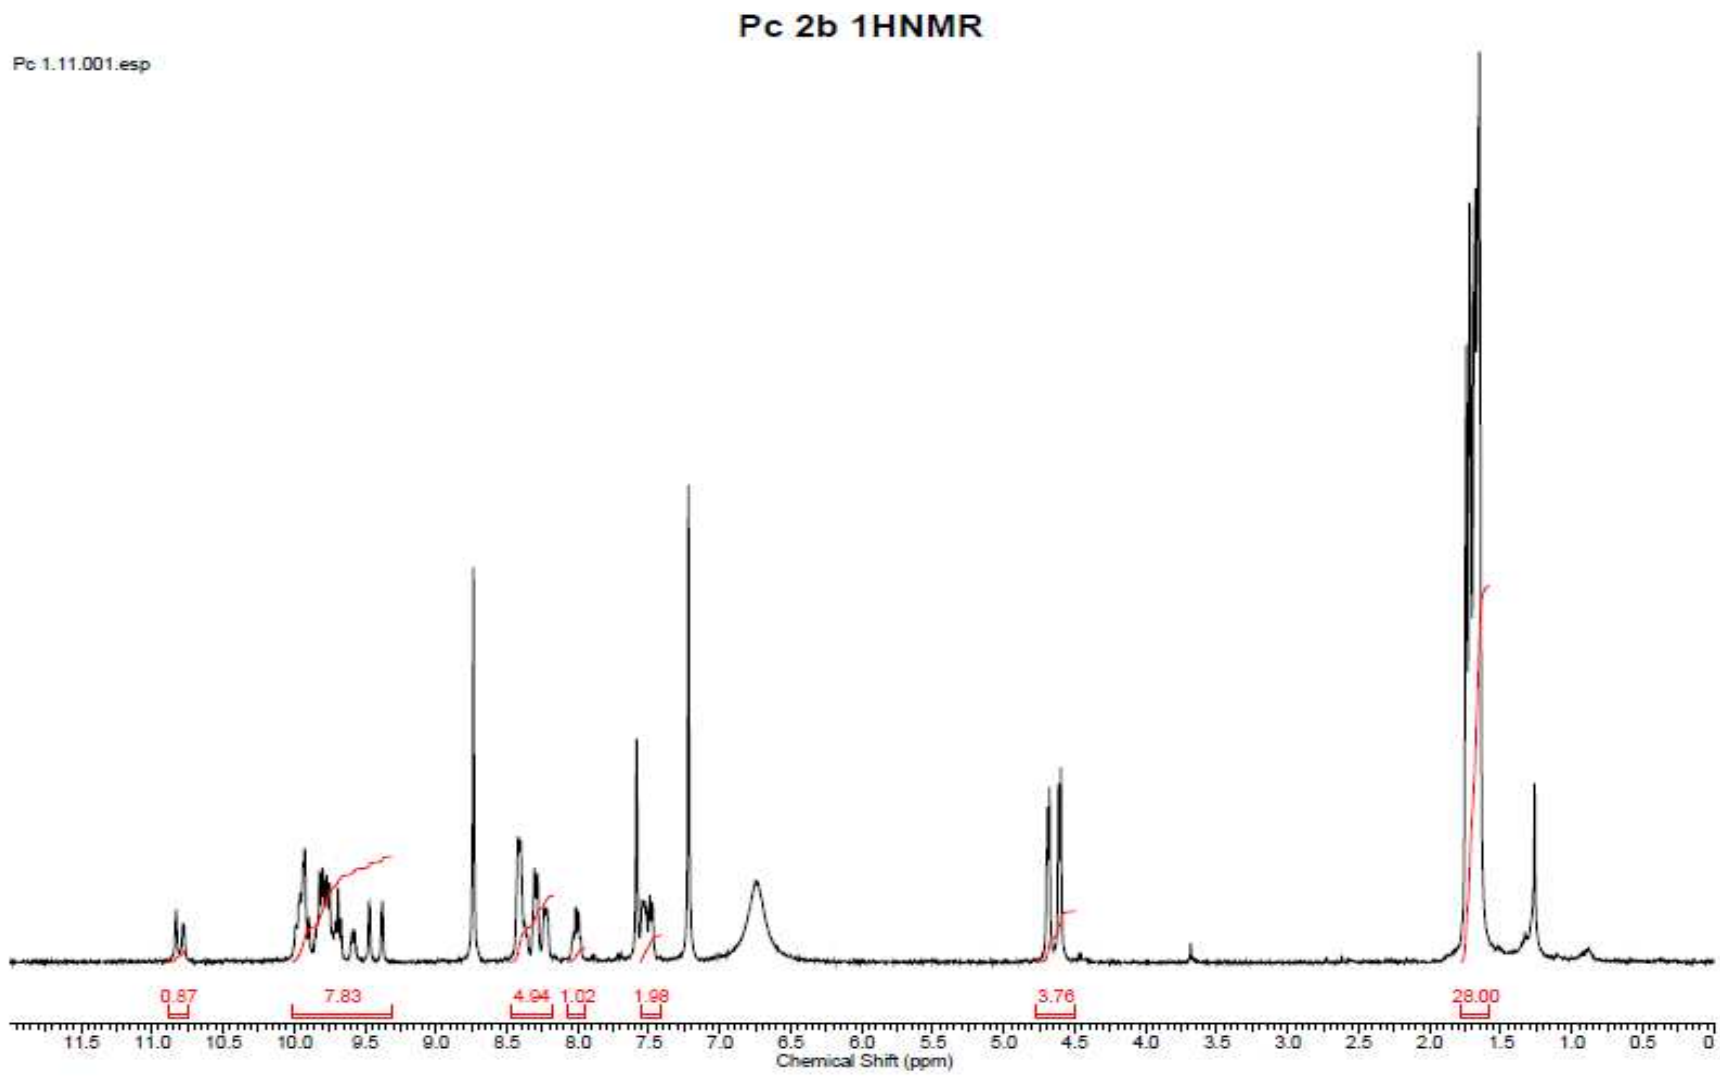

Figure S37. <sup>1</sup>H NMR spectrum for Pc 2b

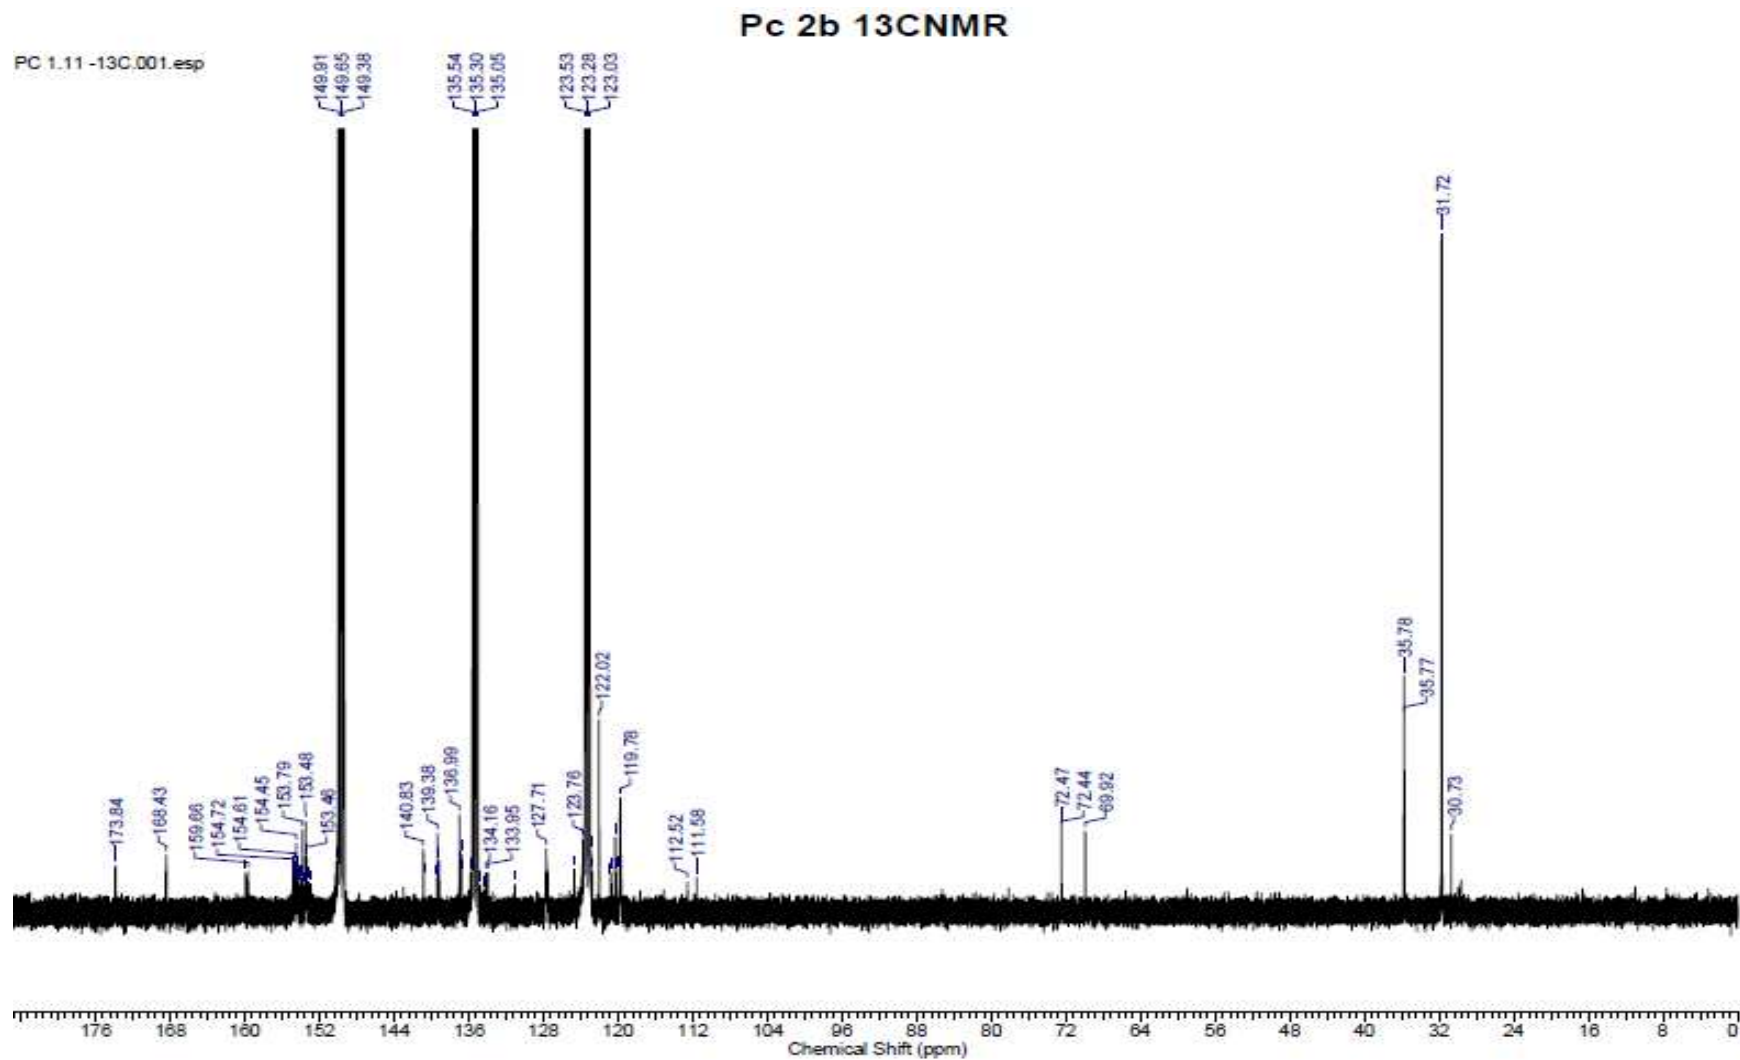

Figure S38. <sup>13</sup>CNMR spectrum for Pc 2b

### Pc 3a protected - <sup>1</sup>HNMR

PC 1.13 PROTECTED.001.esp

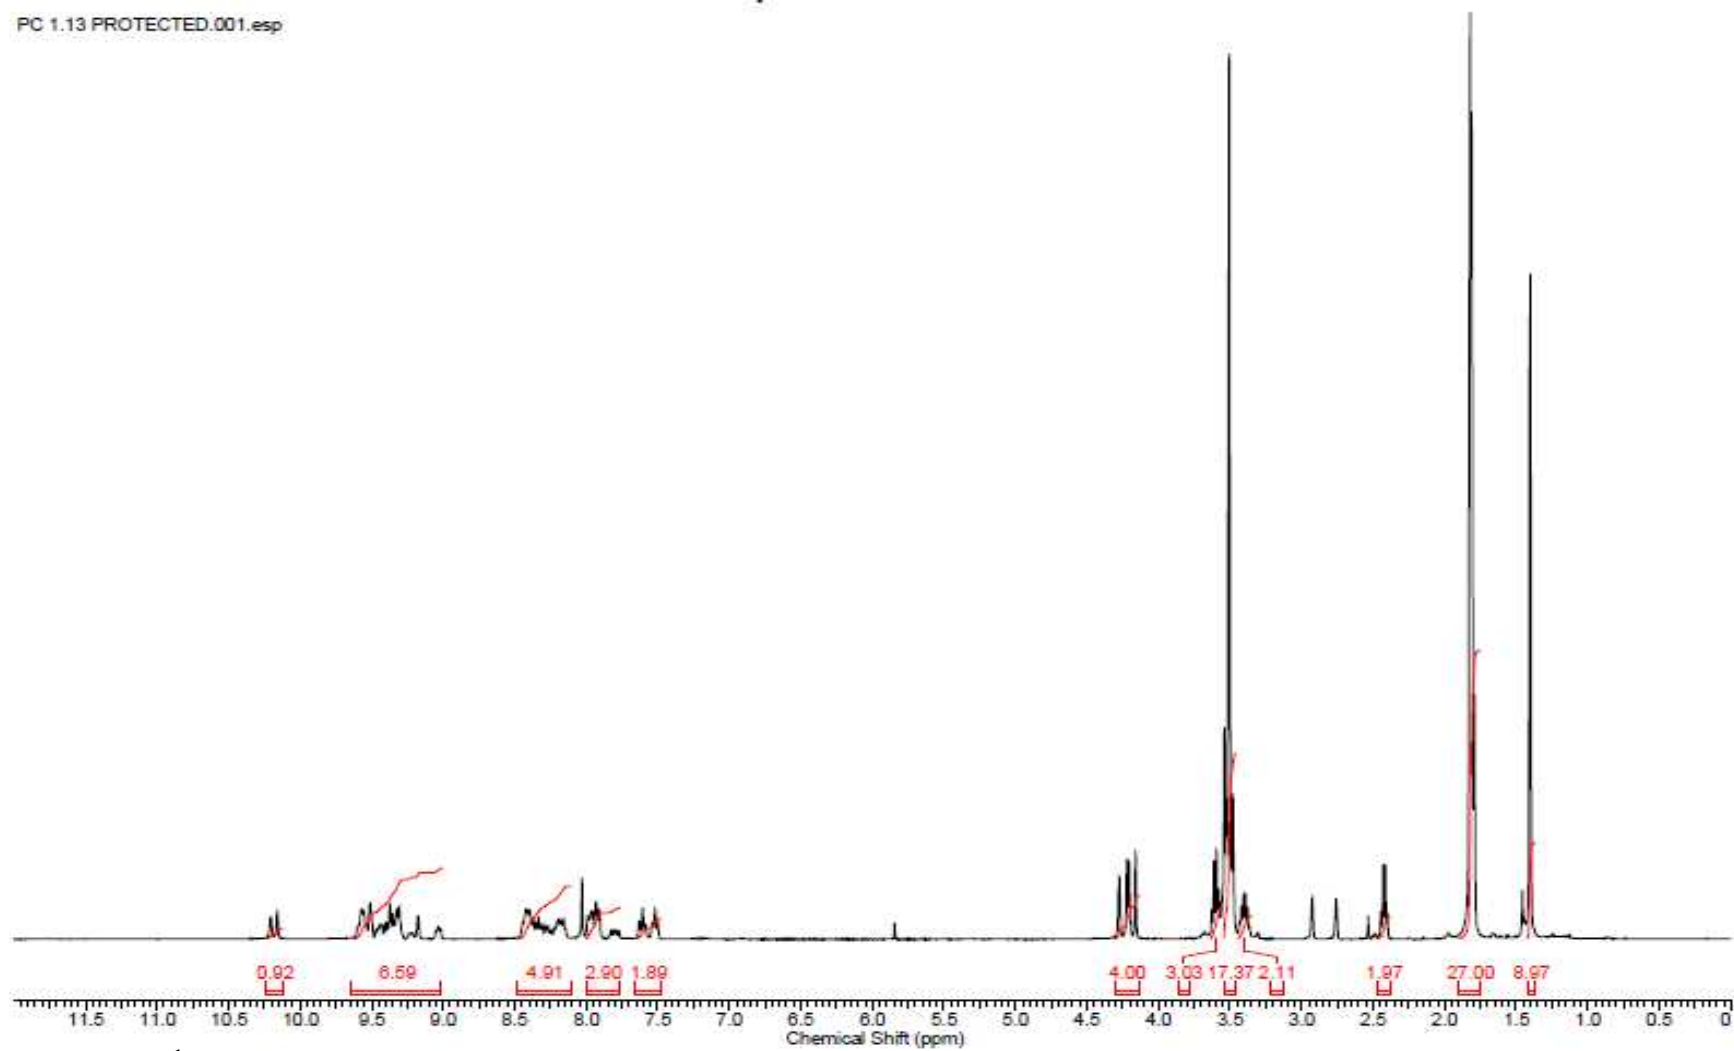

**Figure S39.** <sup>1</sup>H NMR spectrum for protected Pc 3a

# Pc 3a protected - <sup>13</sup>CNMR

Pc 1.13 protected-13C.001.esp

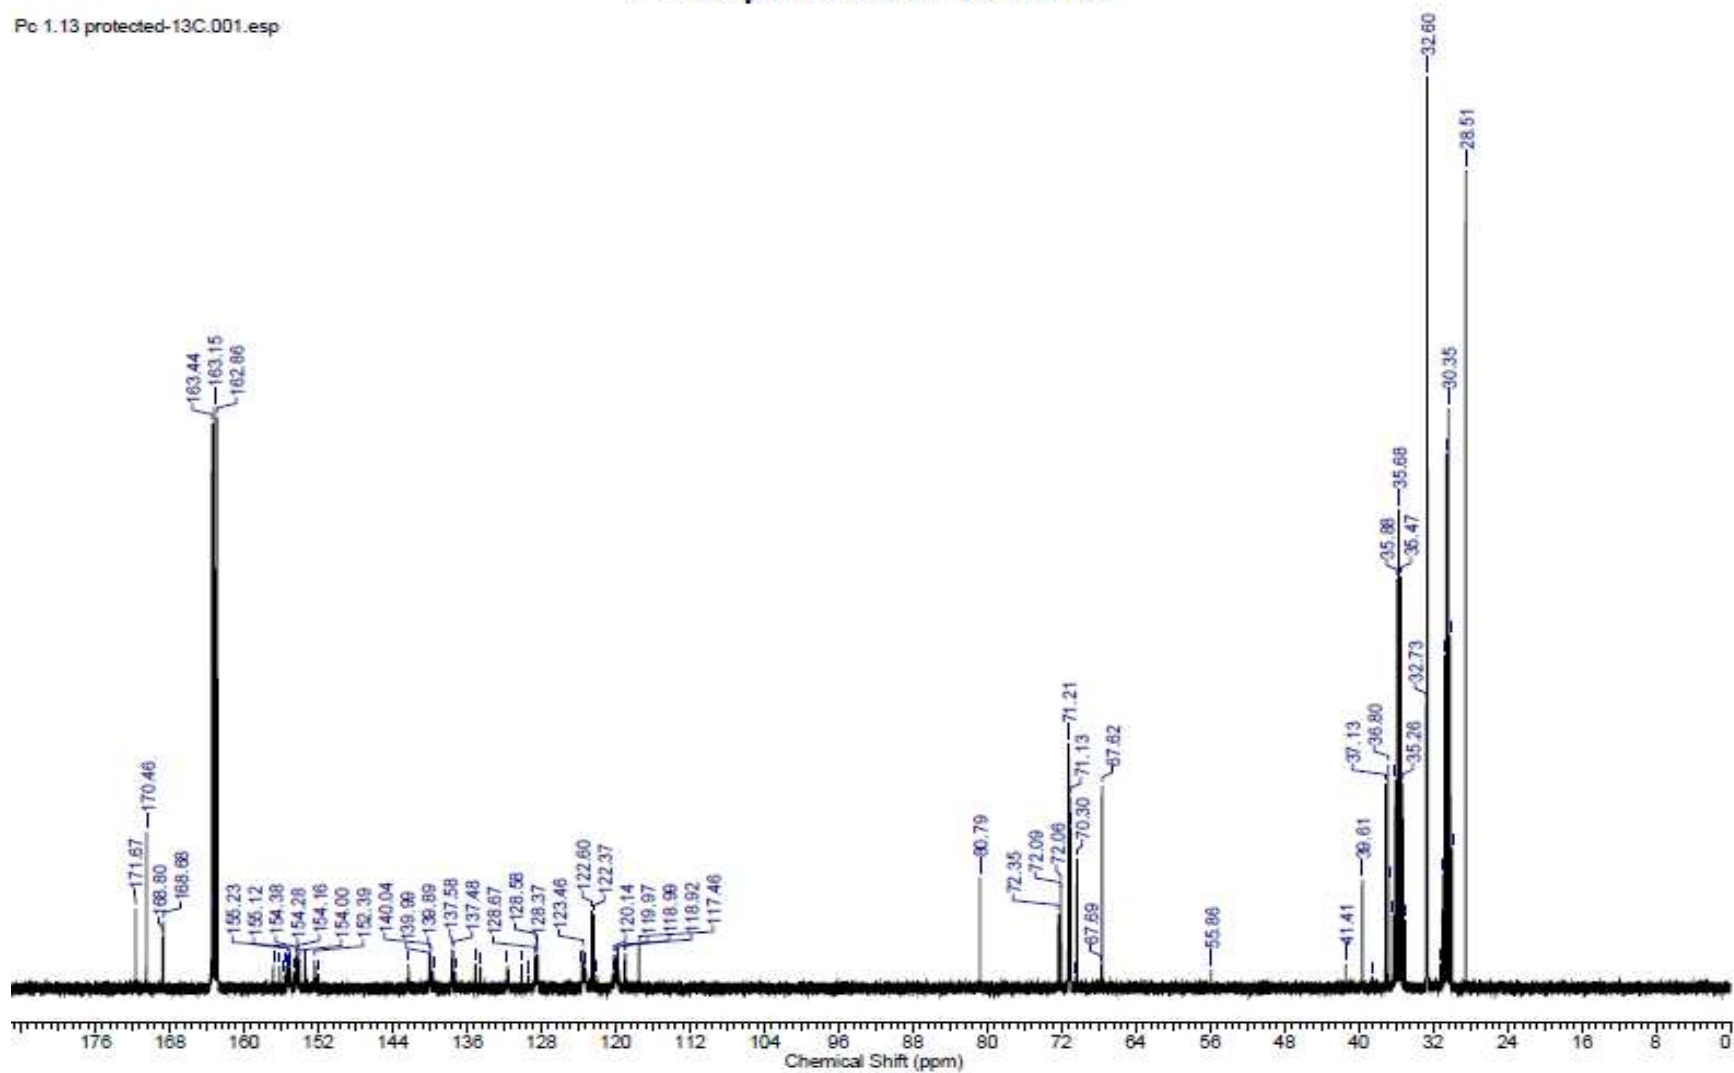

Figure S40. <sup>13</sup>CNMR spectrum for protected Pc 3a

# Pc 3a deprotected - <sup>1</sup>H NMR

Pc 1.13 deprotected.001.esp

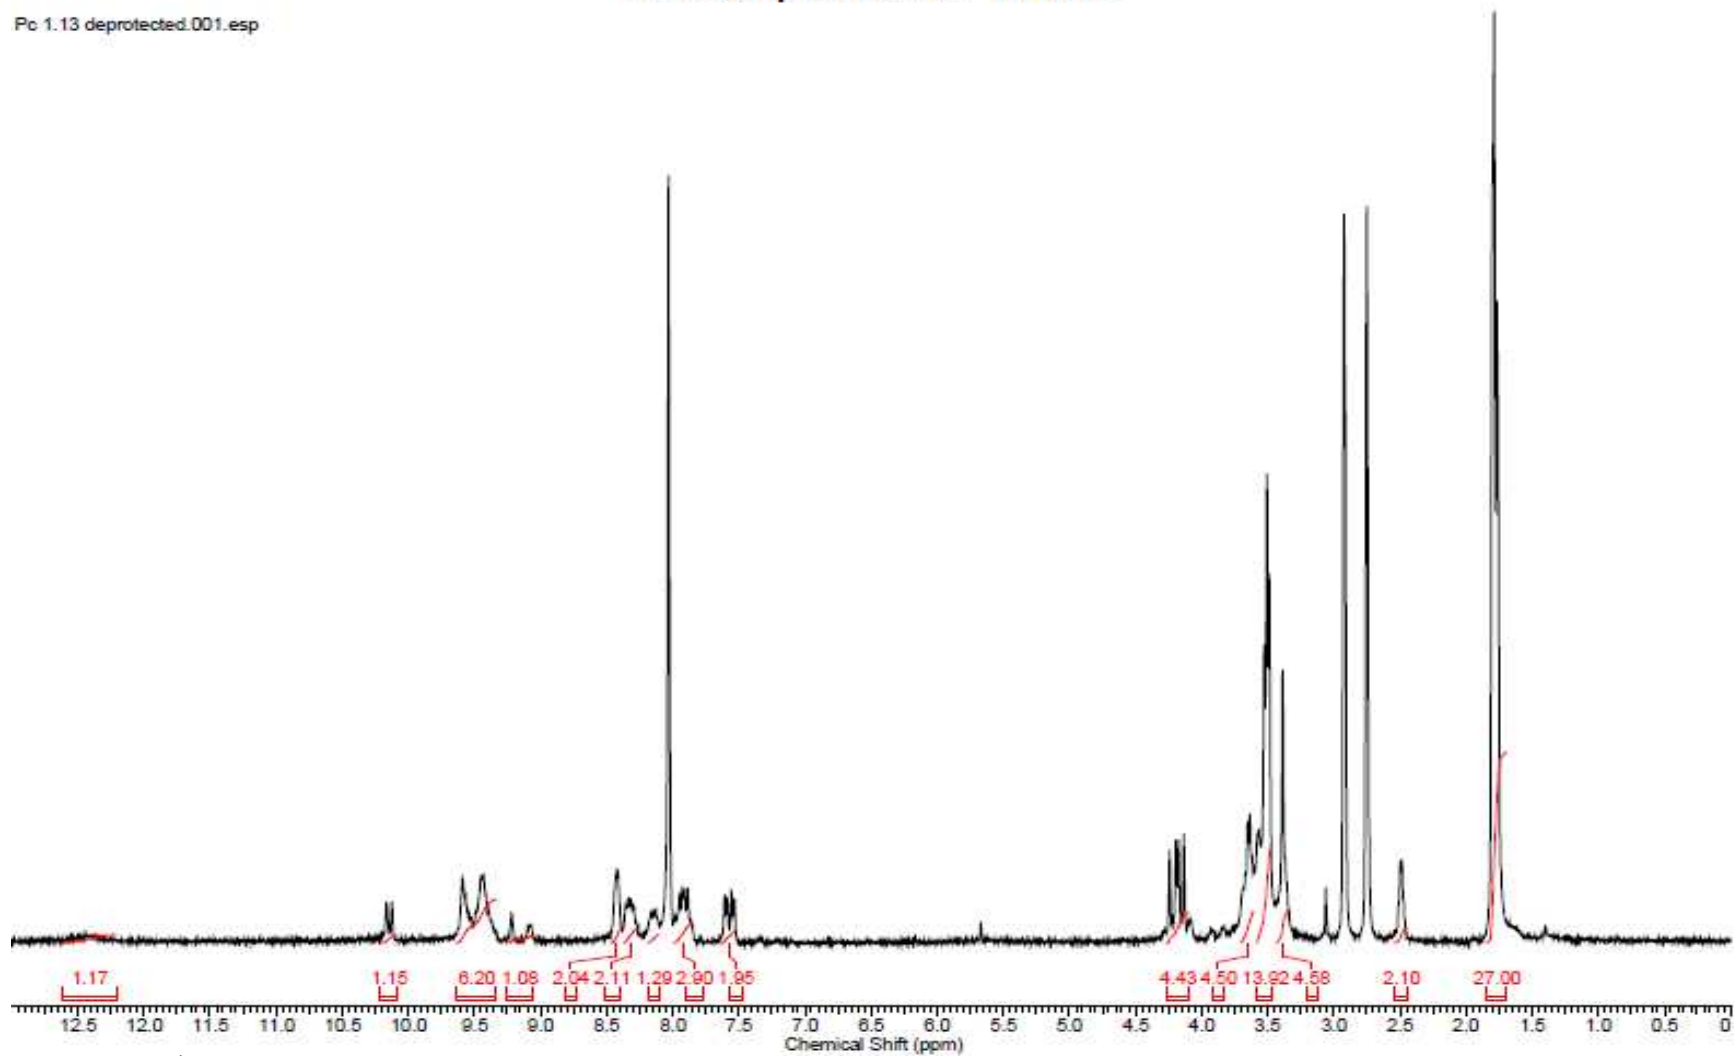

Figure S41. <sup>1</sup>H NMR spectrum for deprotected Pc 3a



### Pc 3a deprotected - <sup>13</sup>CNMR

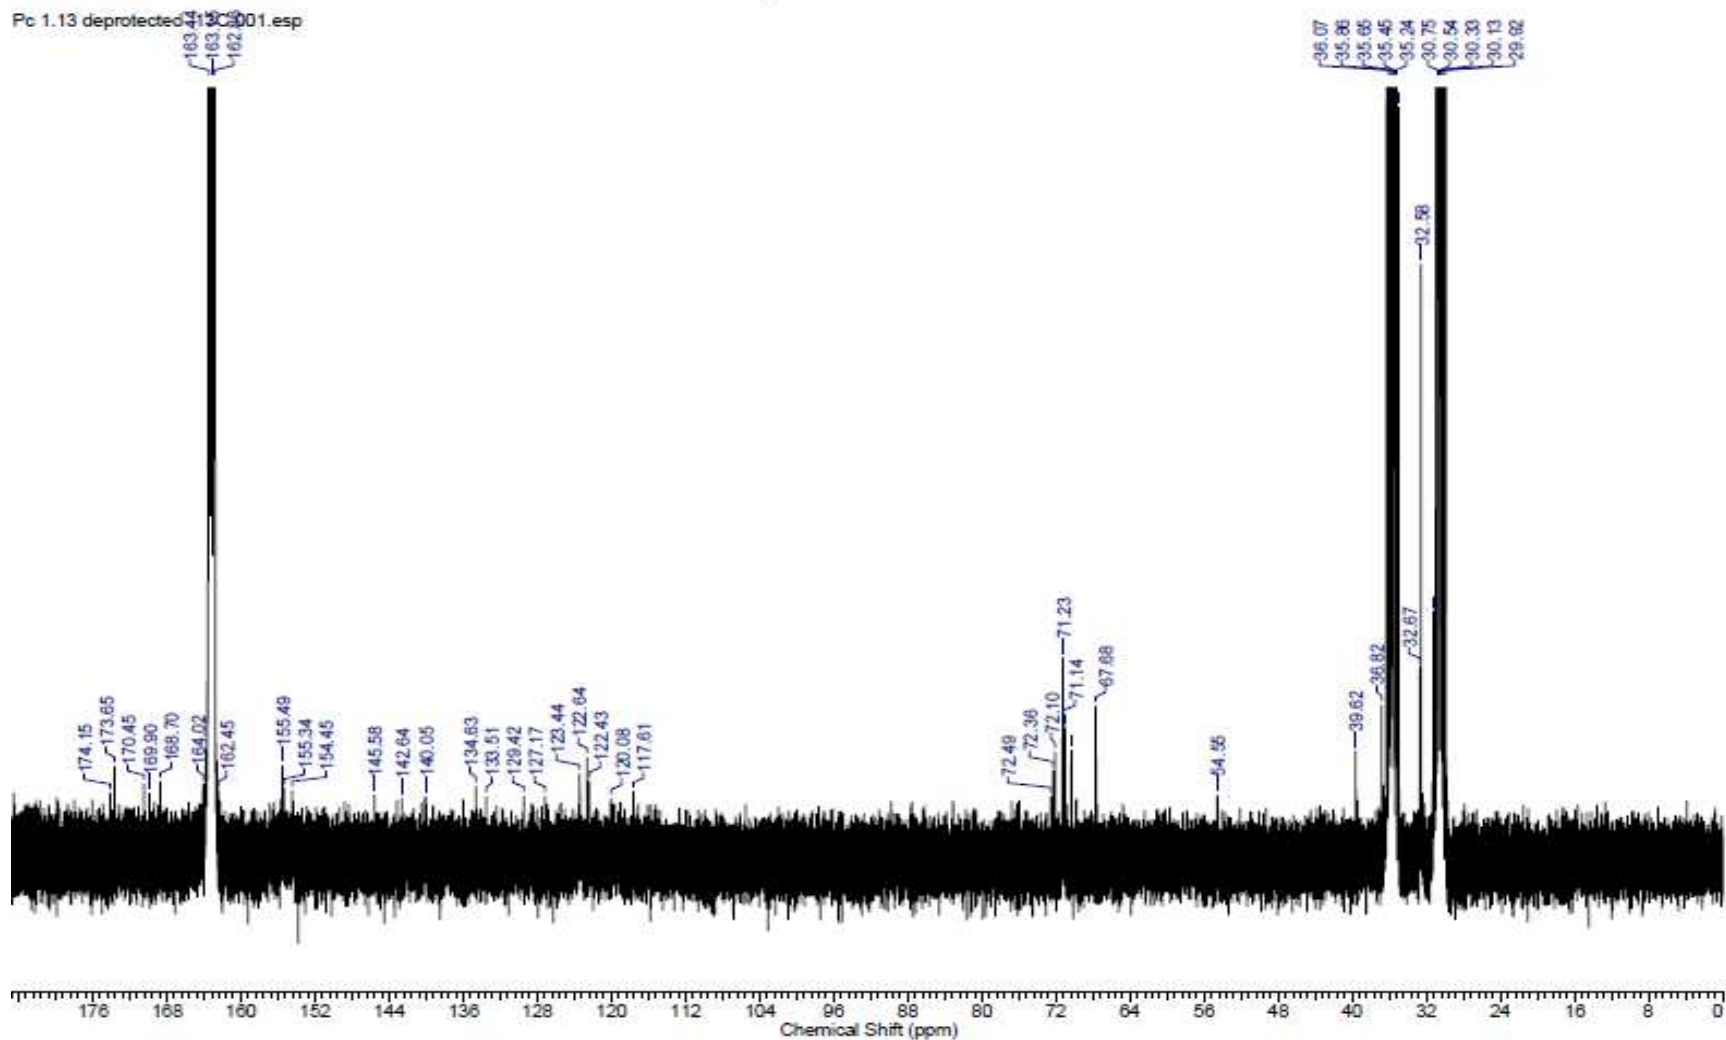

Figure S42. <sup>13</sup>CNMR spectrum for deprotected Pc 3a

# Pc 3b protected - 1HNMR

Pc 1.14 protected.001.esp

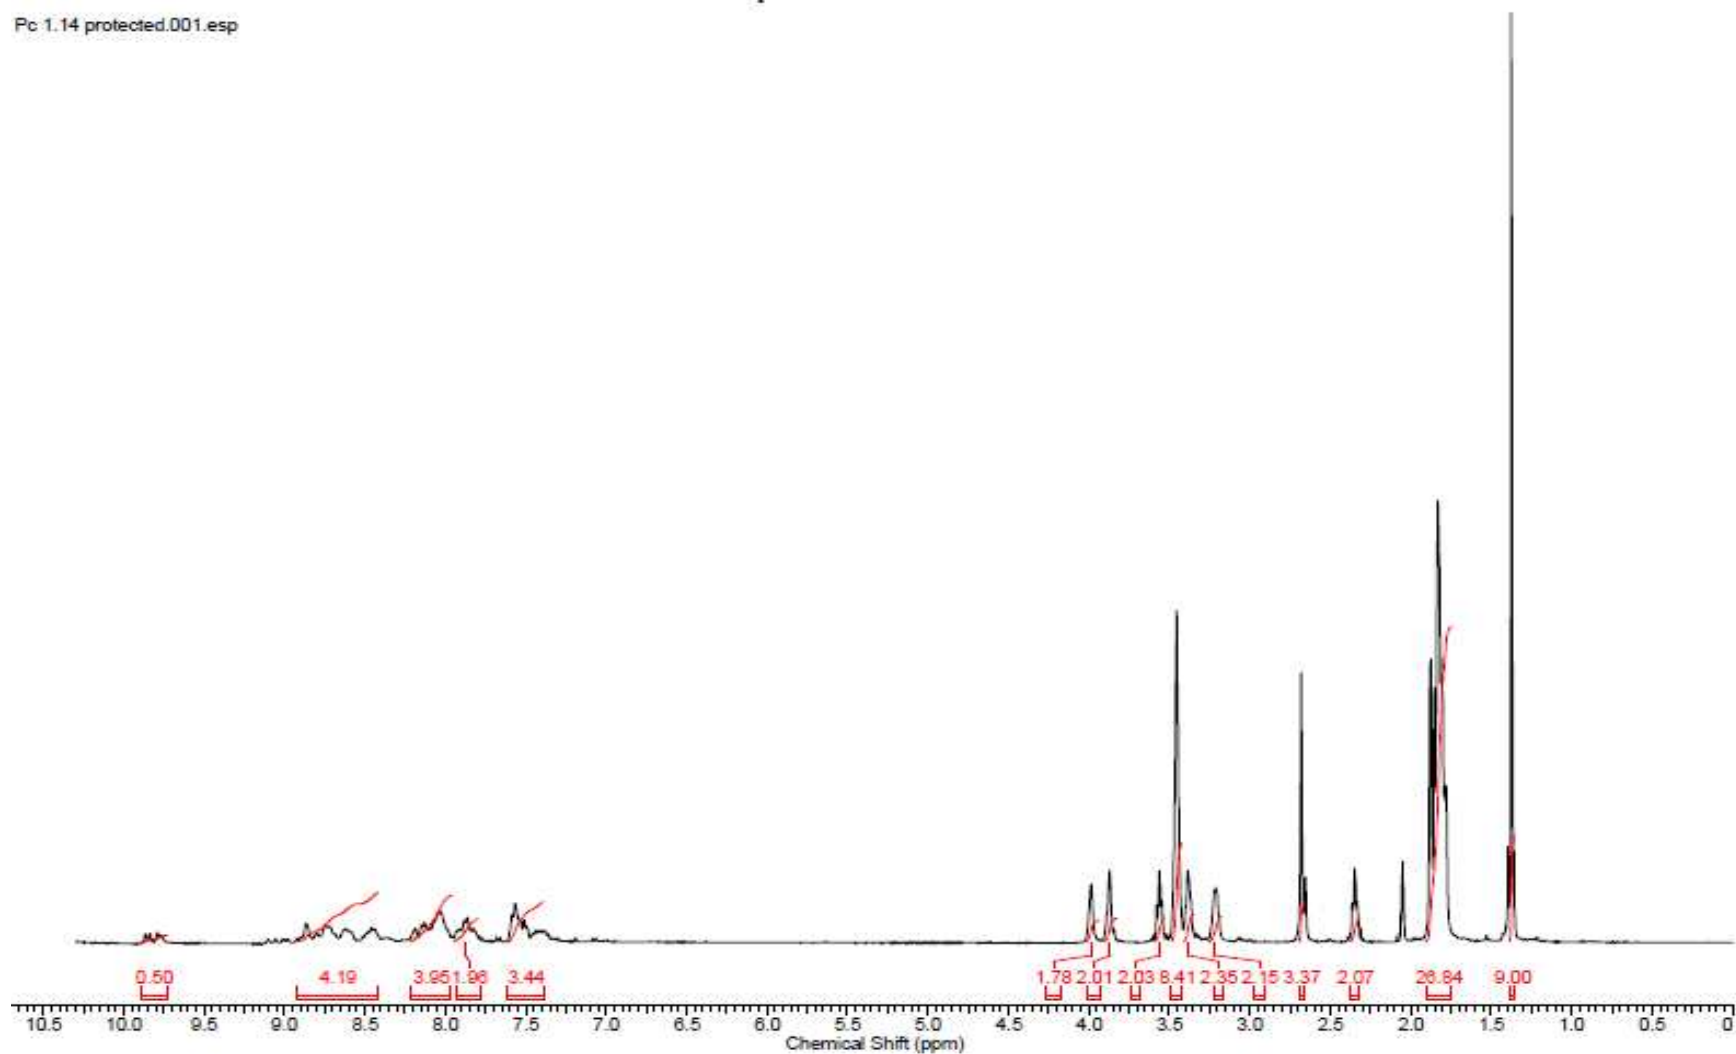

Figure S43. <sup>1</sup>H NMR spectrum for protected Pc 3b

### Pc 3b protected - $^{13}\text{C}$ NMR

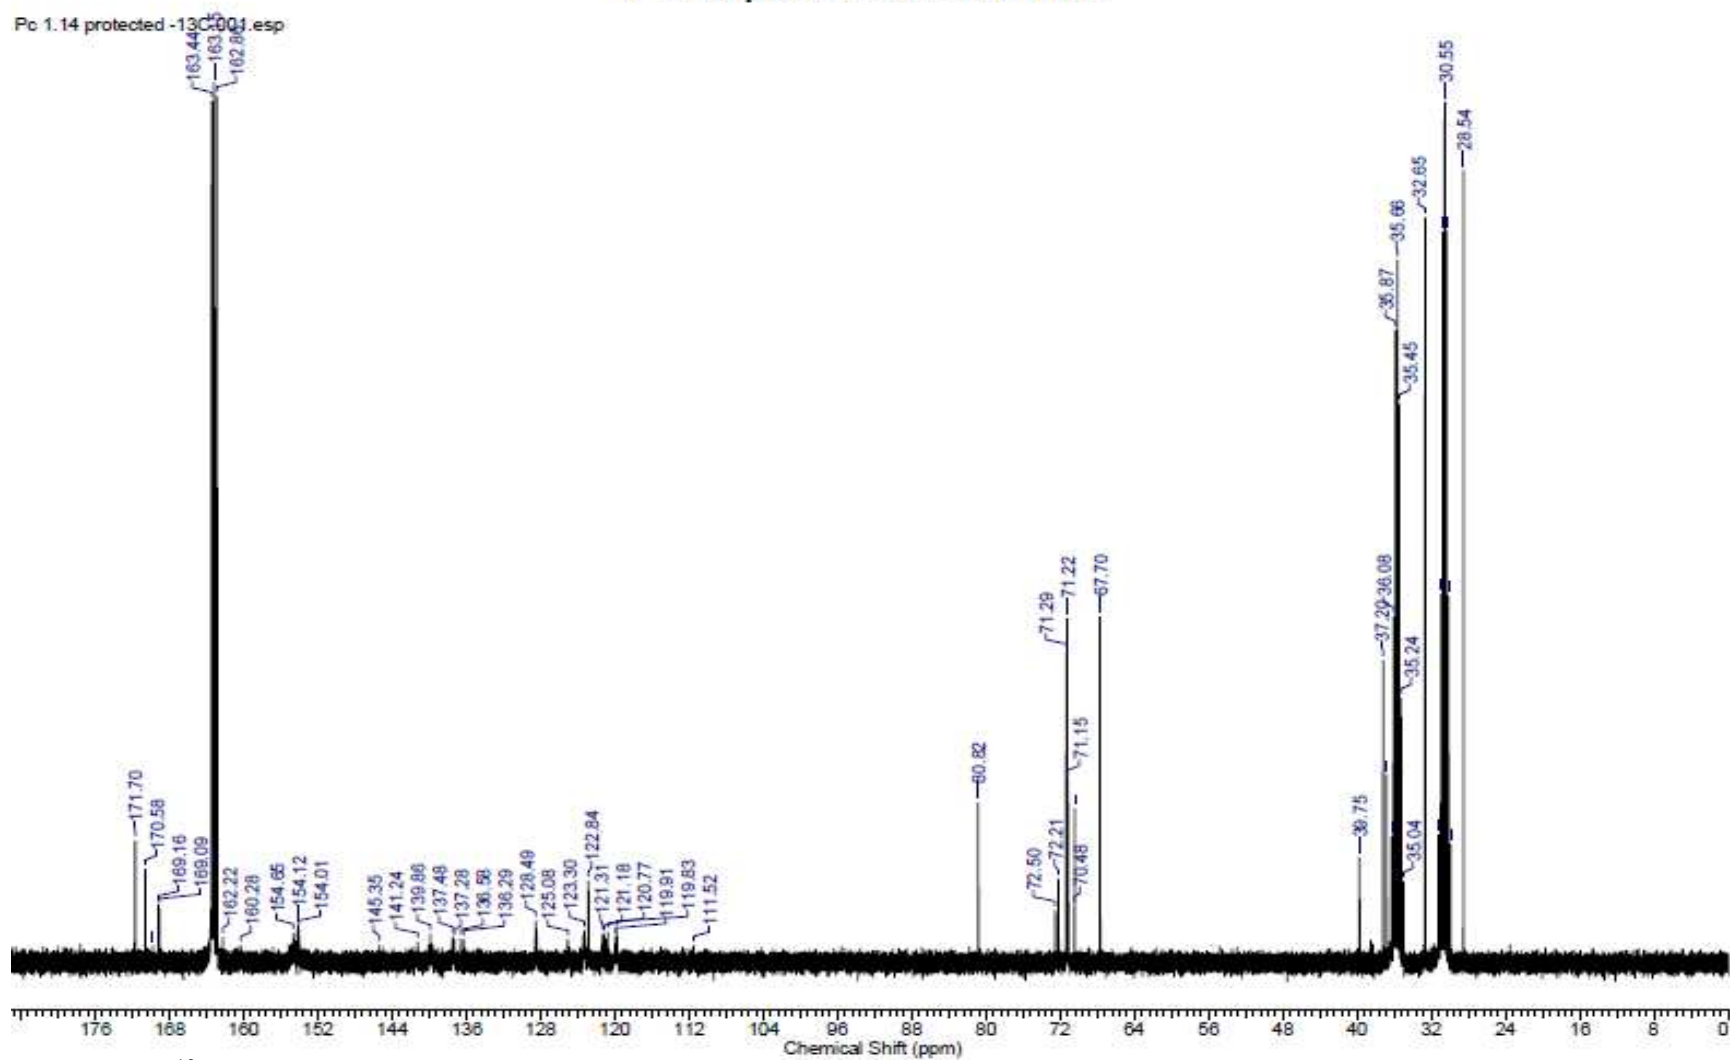

Figure S44.  $^{13}\text{C}$ NMR spectrum for protected Pc 3b

# Pc 3b deprotected - <sup>1</sup>HNMR

Pc 1.14 deprotected.001.esp

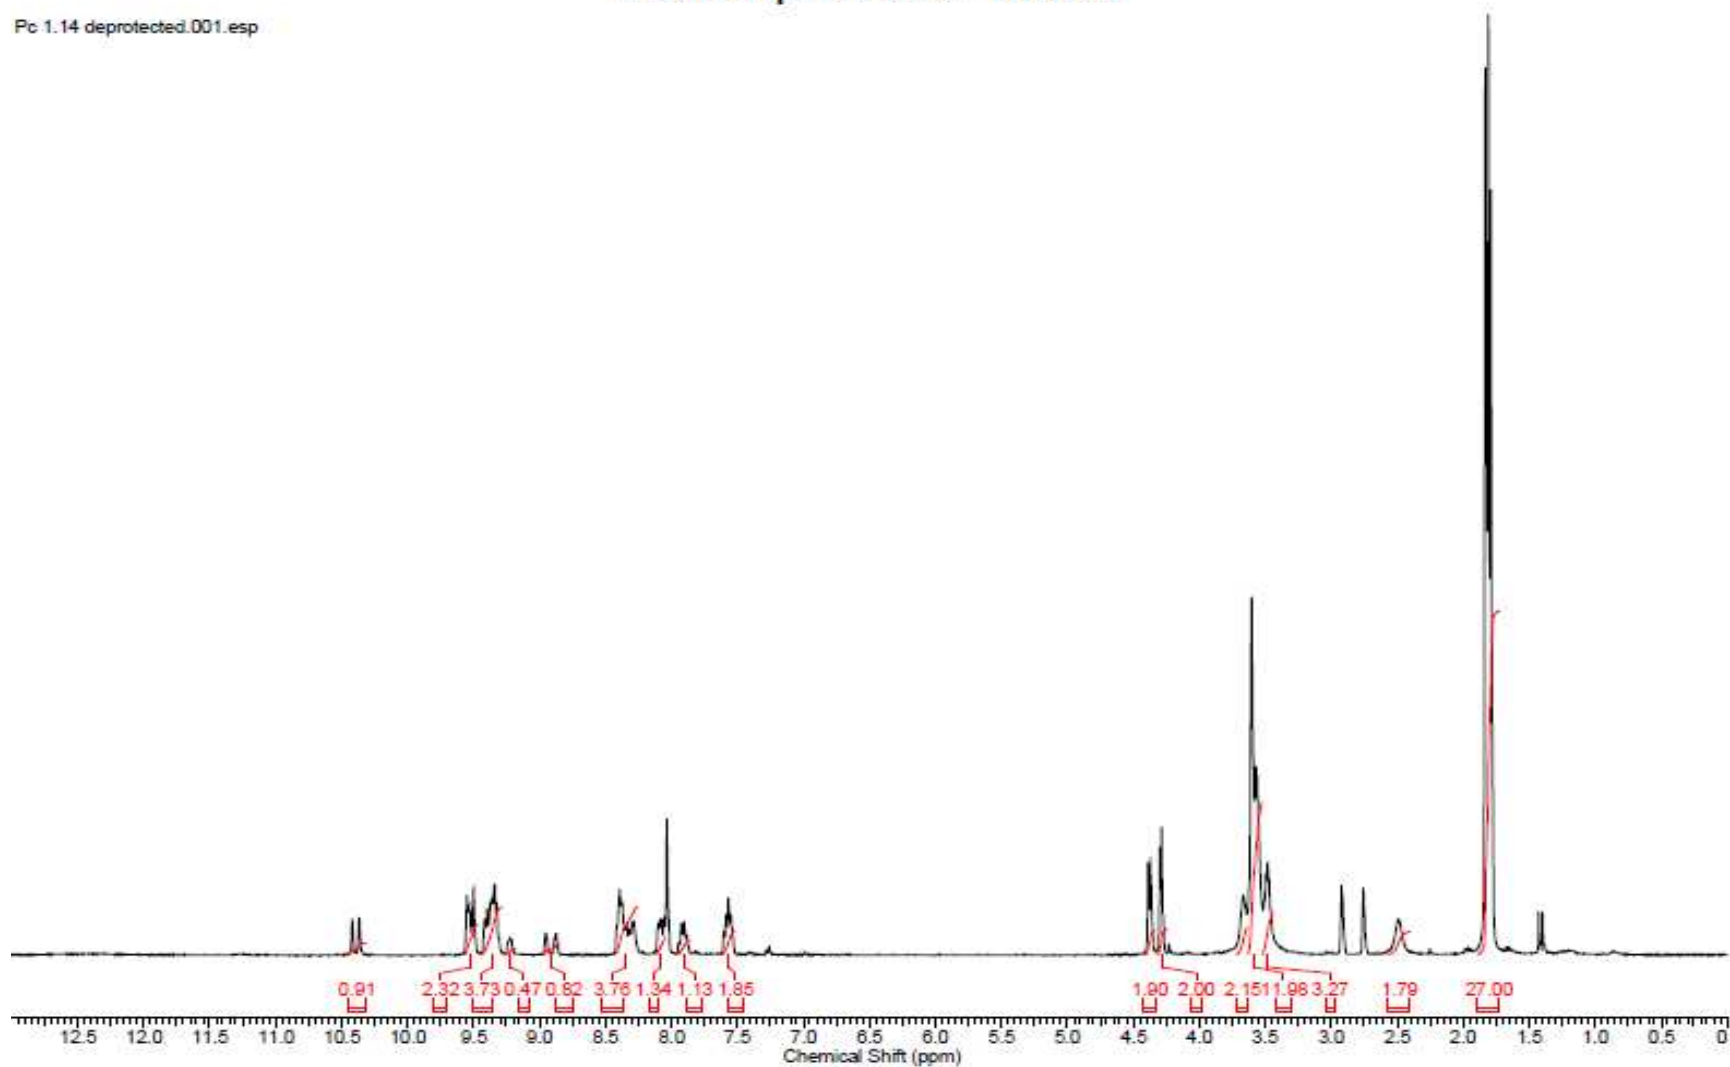

Figure S45. <sup>1</sup>H NMR spectrum for deprotected Pc 3b

# Pc 3b deprotected - $^{13}\text{C}$ NMR

Pc 1.14 deprotected-13C.001.esp

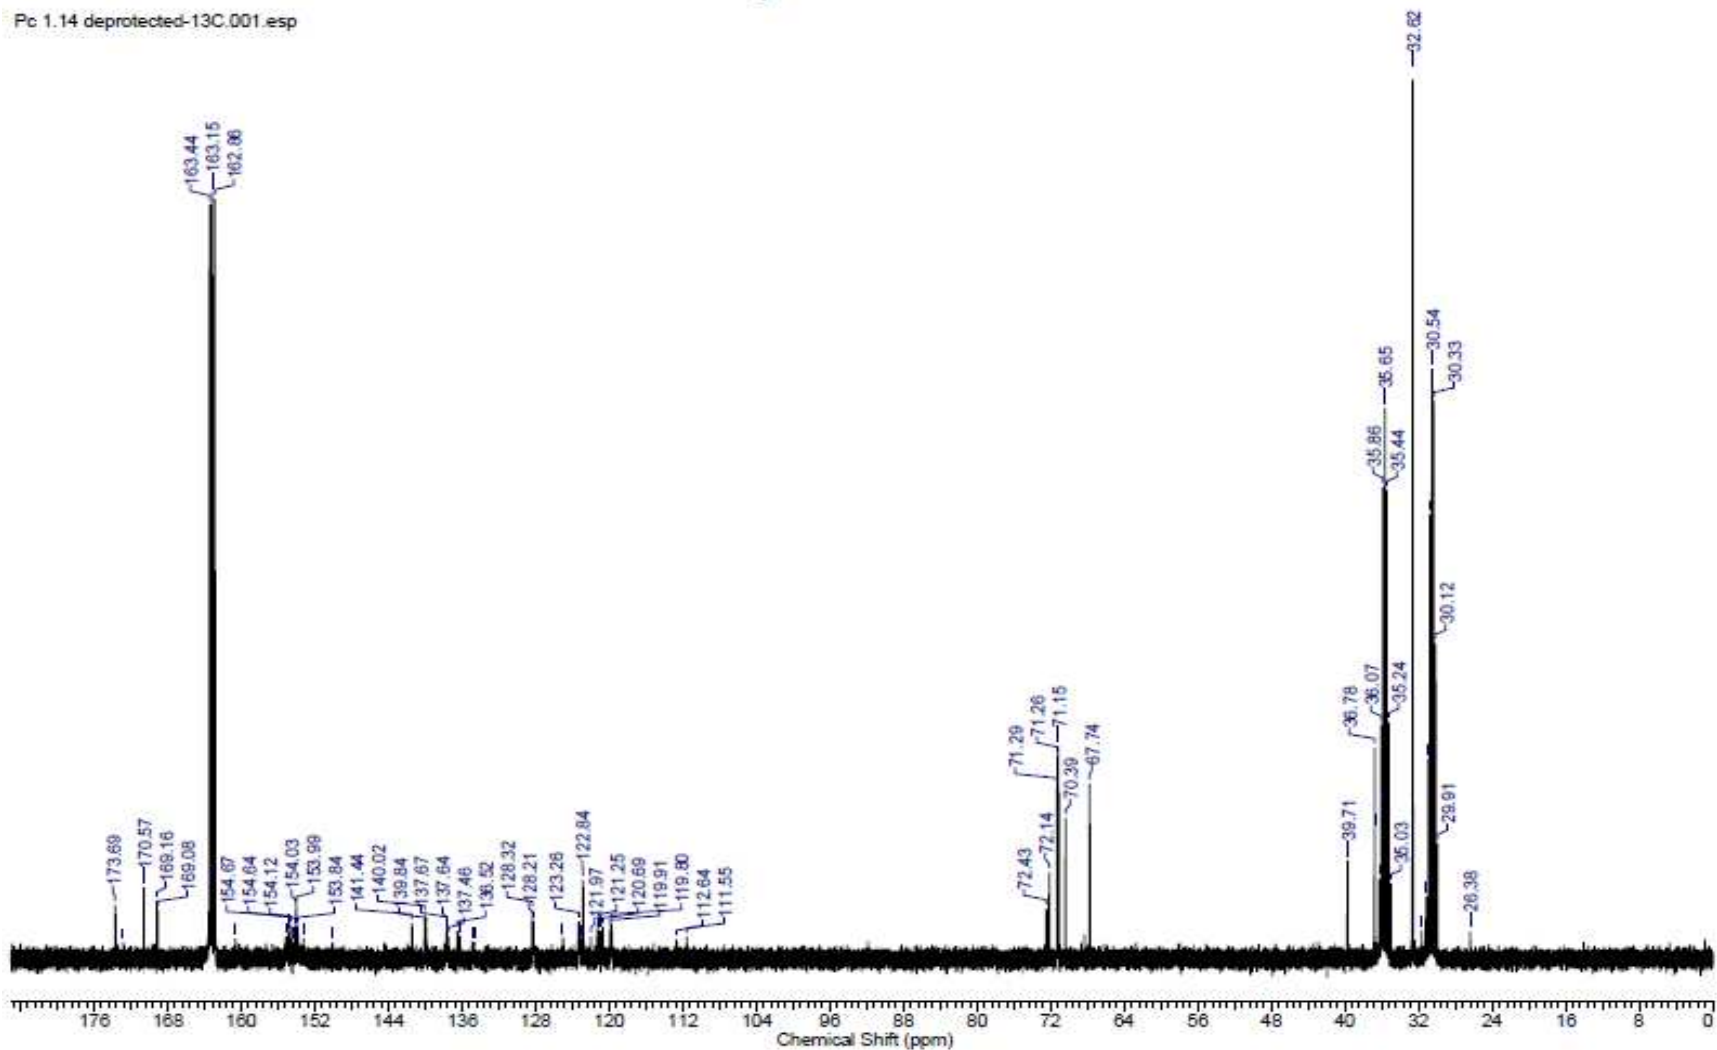

Figure S46.  $^{13}\text{C}$ NMR spectrum for deprotected Pc 3b

# Pc-Conjugate 4b 1HNMR

Pc 1.17.001.esp

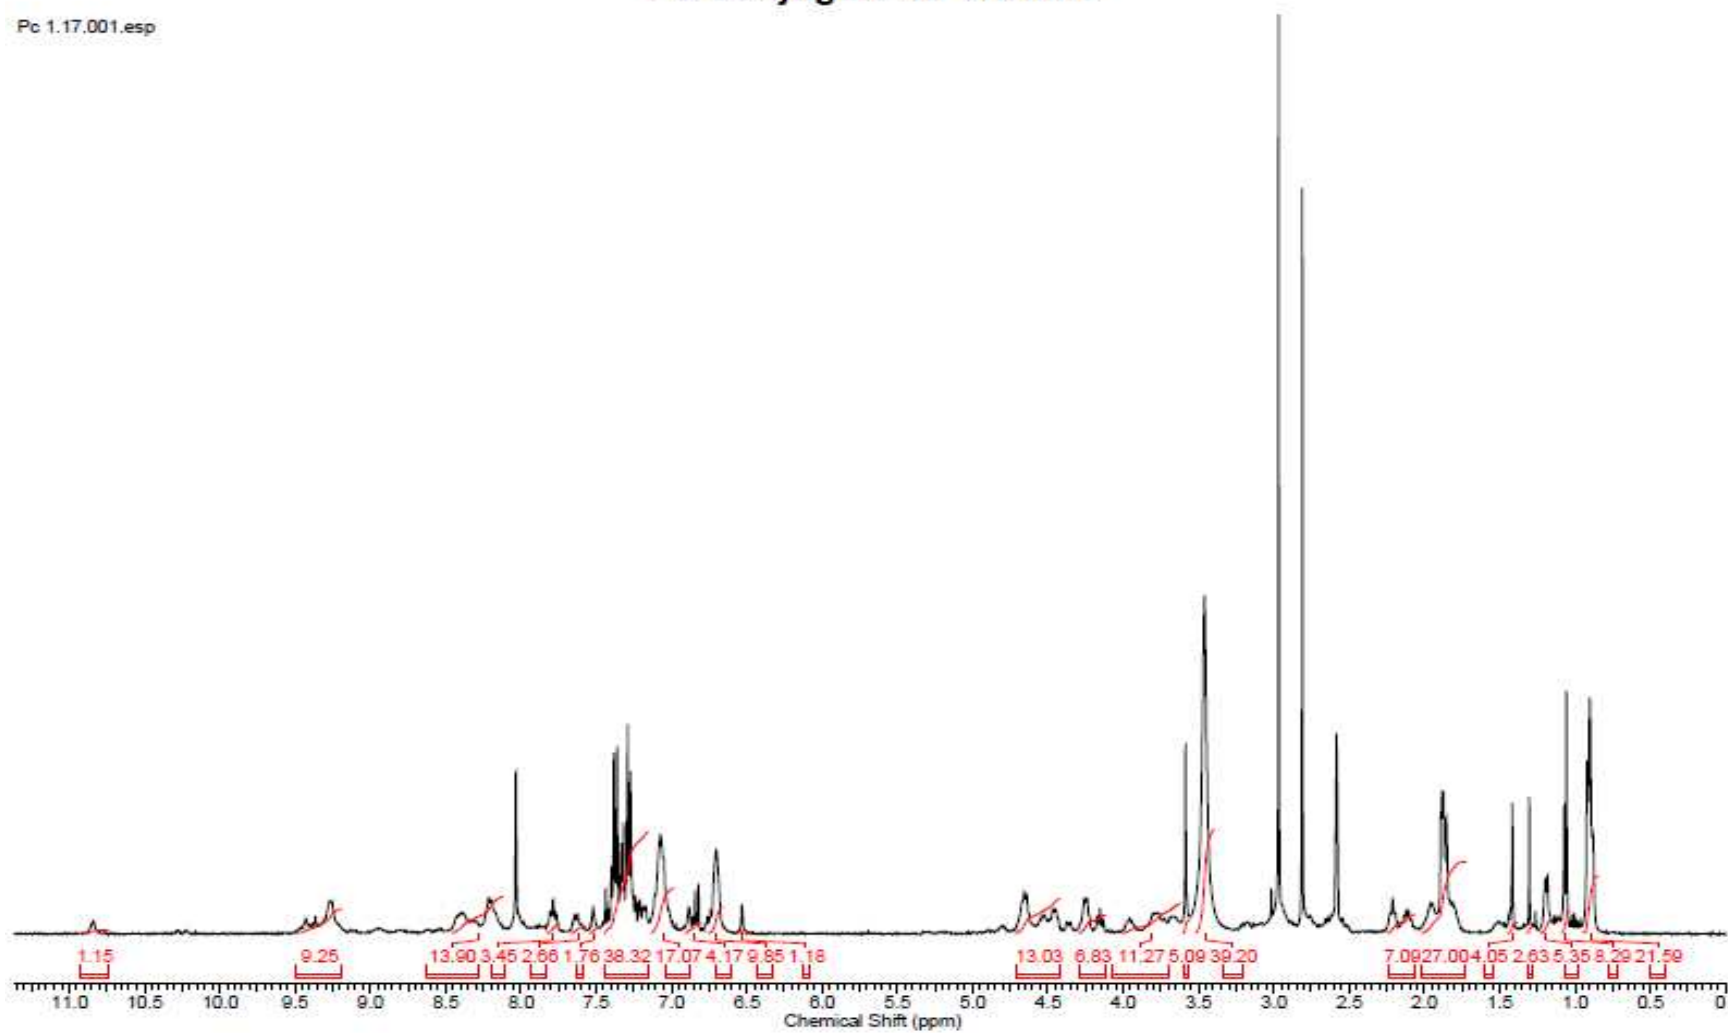

Figure S47. <sup>1</sup>H NMR spectrum for Pc-conjugate 4b

# Pc-Conjugate 6a 1HNMR

Pc 1.18.001.esp

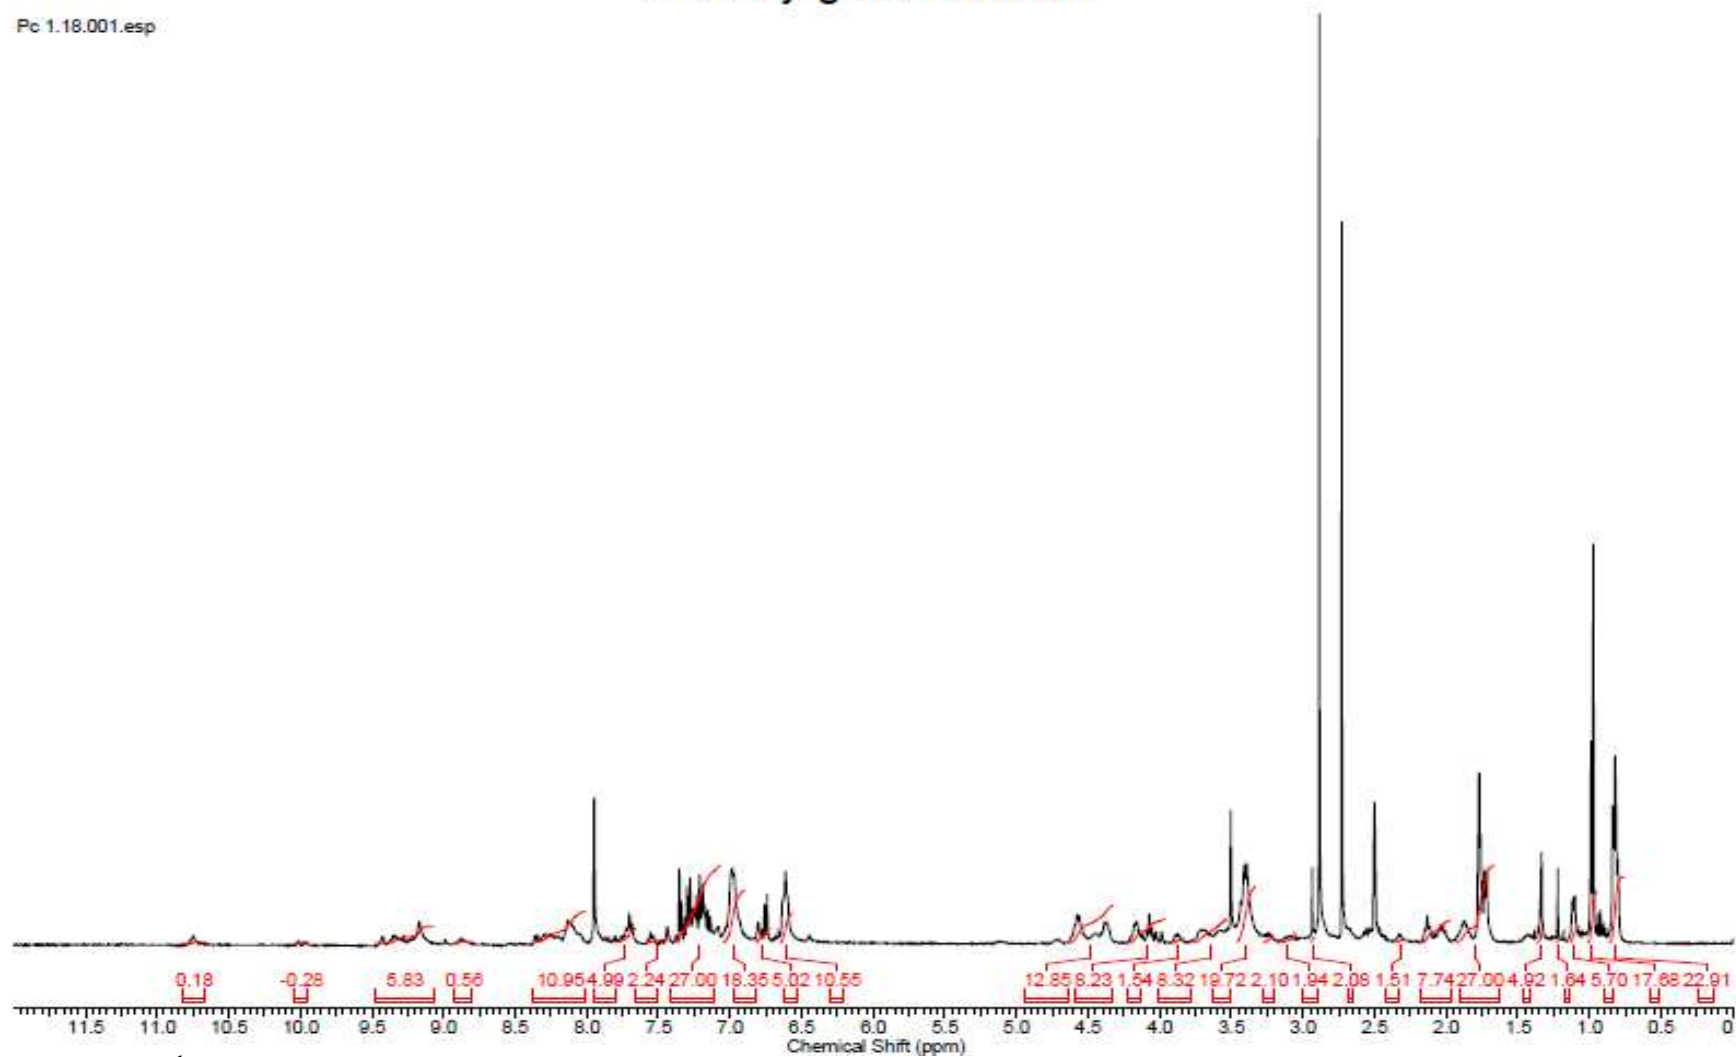

Figure S48. <sup>1</sup>H NMR spectrum for Pc-conjugate 6a

# Pc-Conjugate 5a 1HNMR

Pc 1.24.001.esp

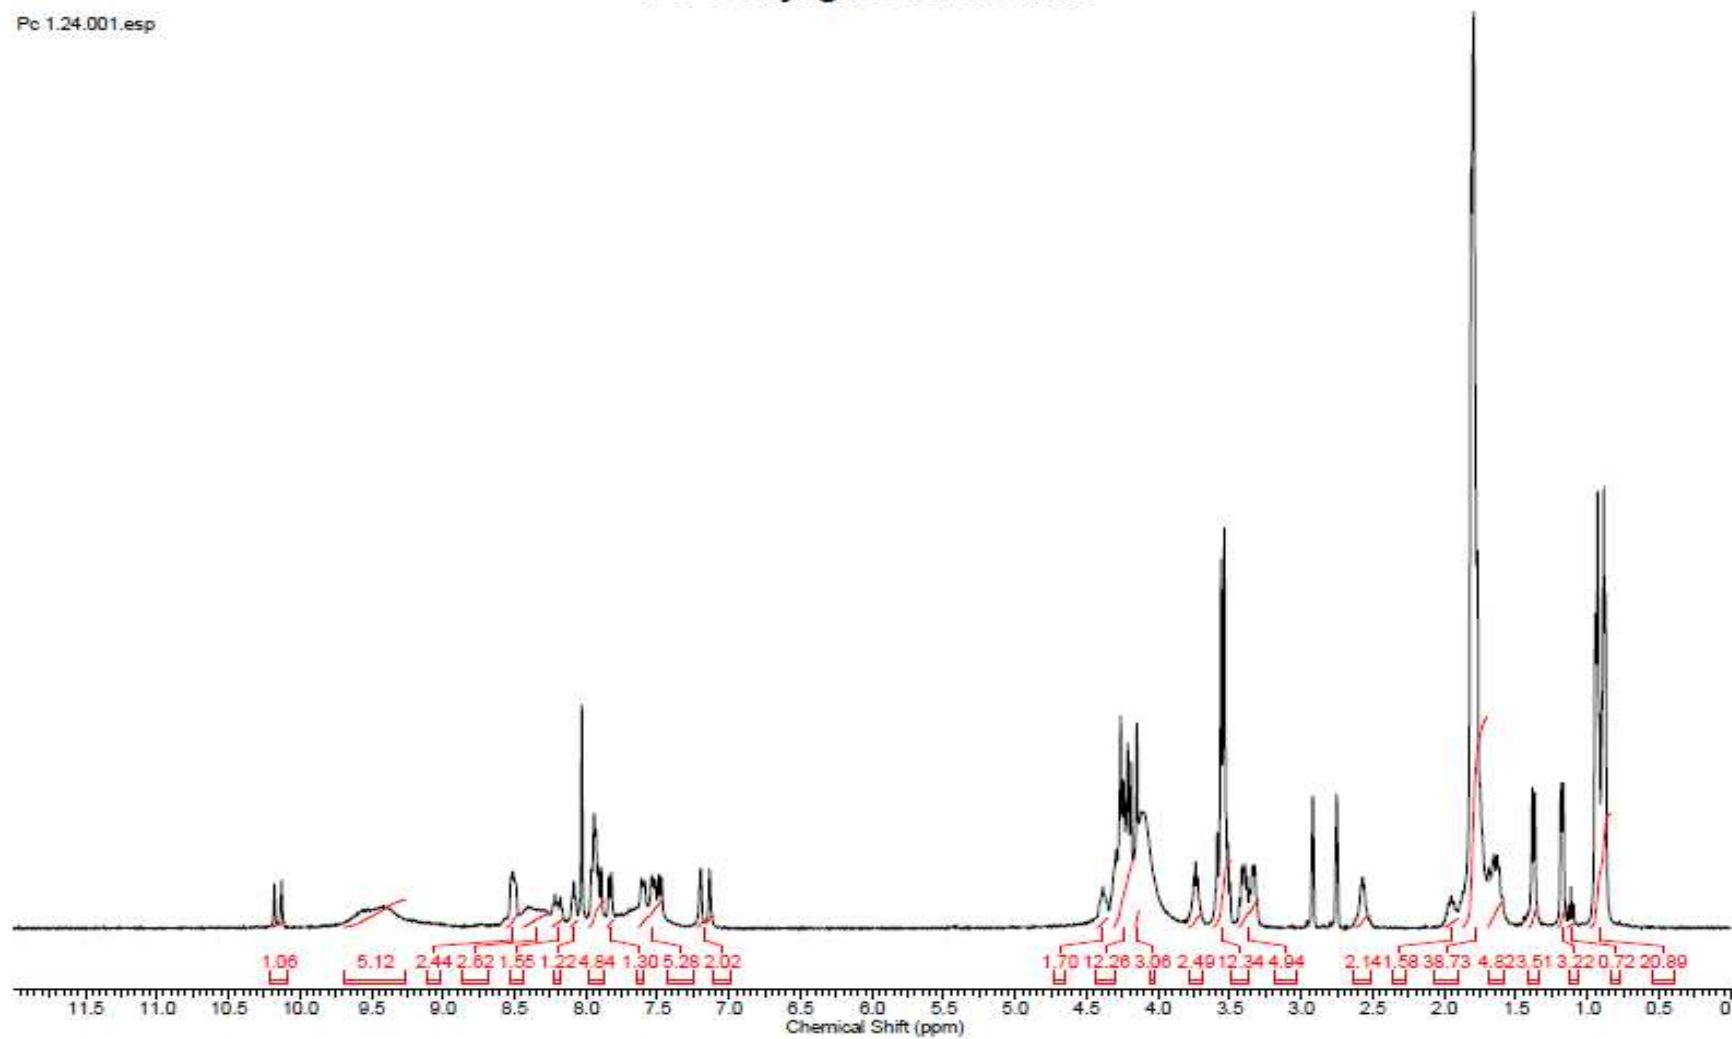

Figure S49. <sup>1</sup>H NMR spectrum for Pc-conjugate 5a



# Pc-Conjugate 5a <sup>13</sup>CNMR

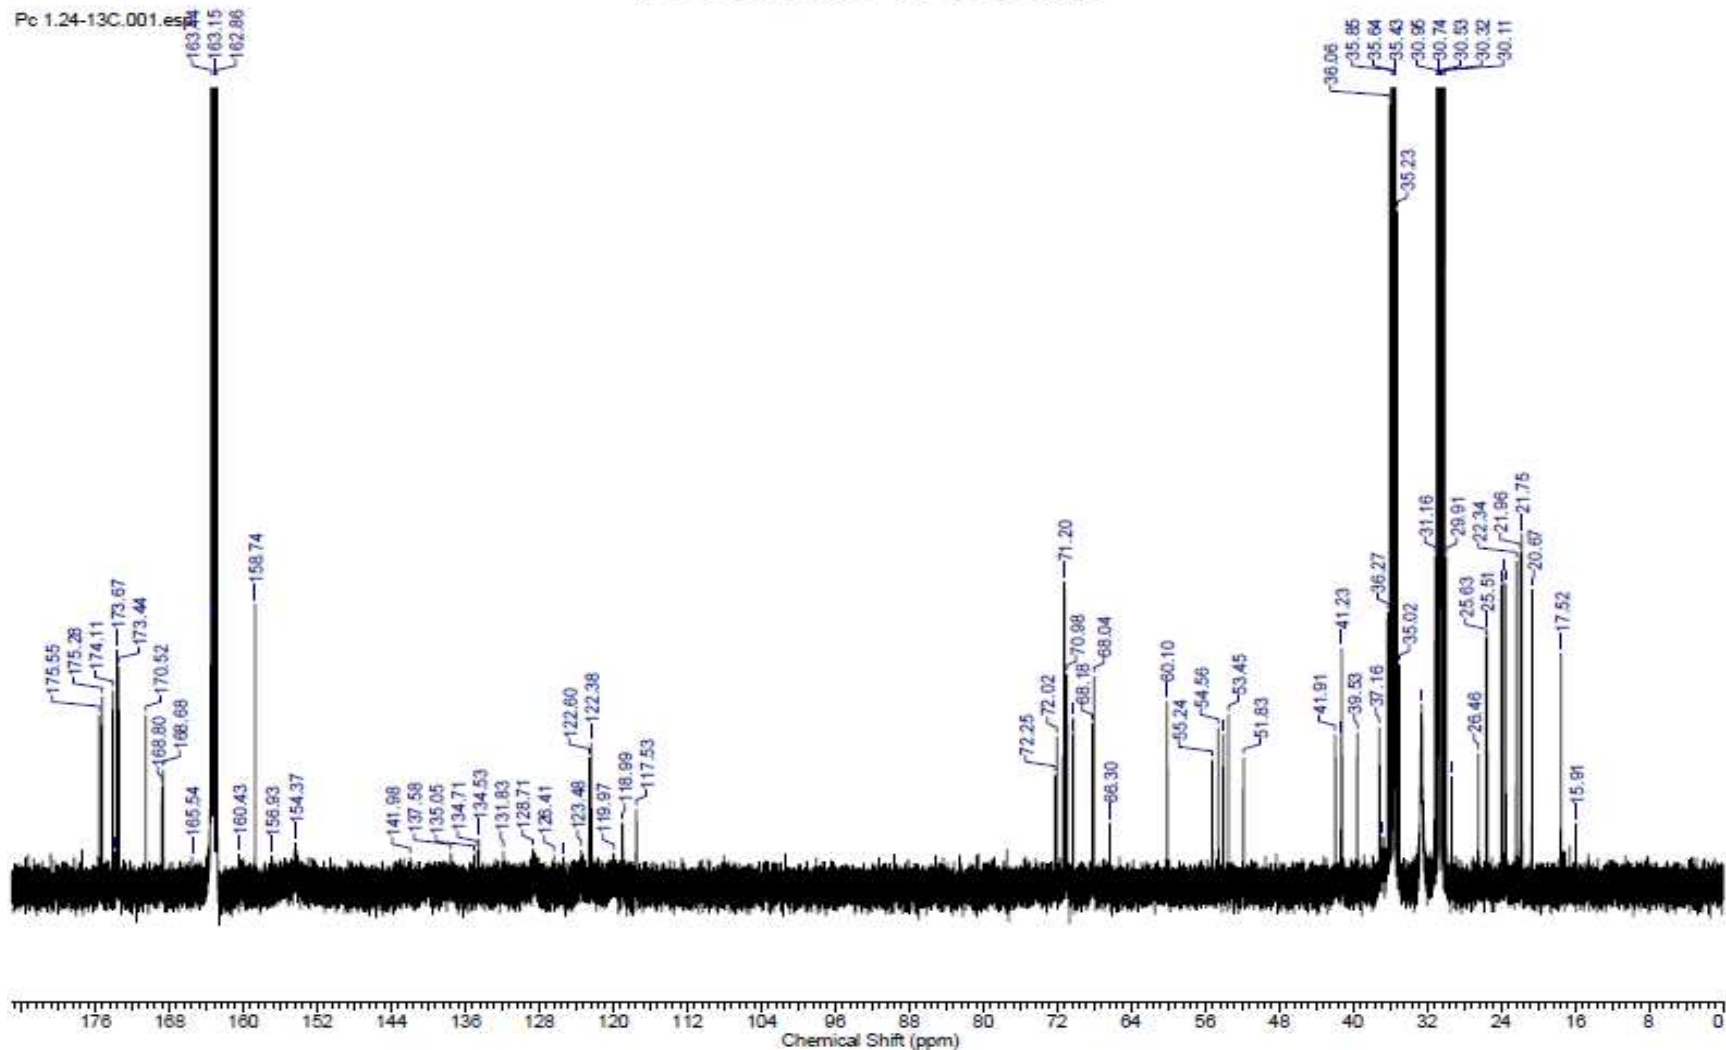

Figure S50. <sup>13</sup>CNMR spectrum for Pc-conjugate 5a

# Pc-Conjugate 5b 1HNMR

Pc 1.25.001.esp

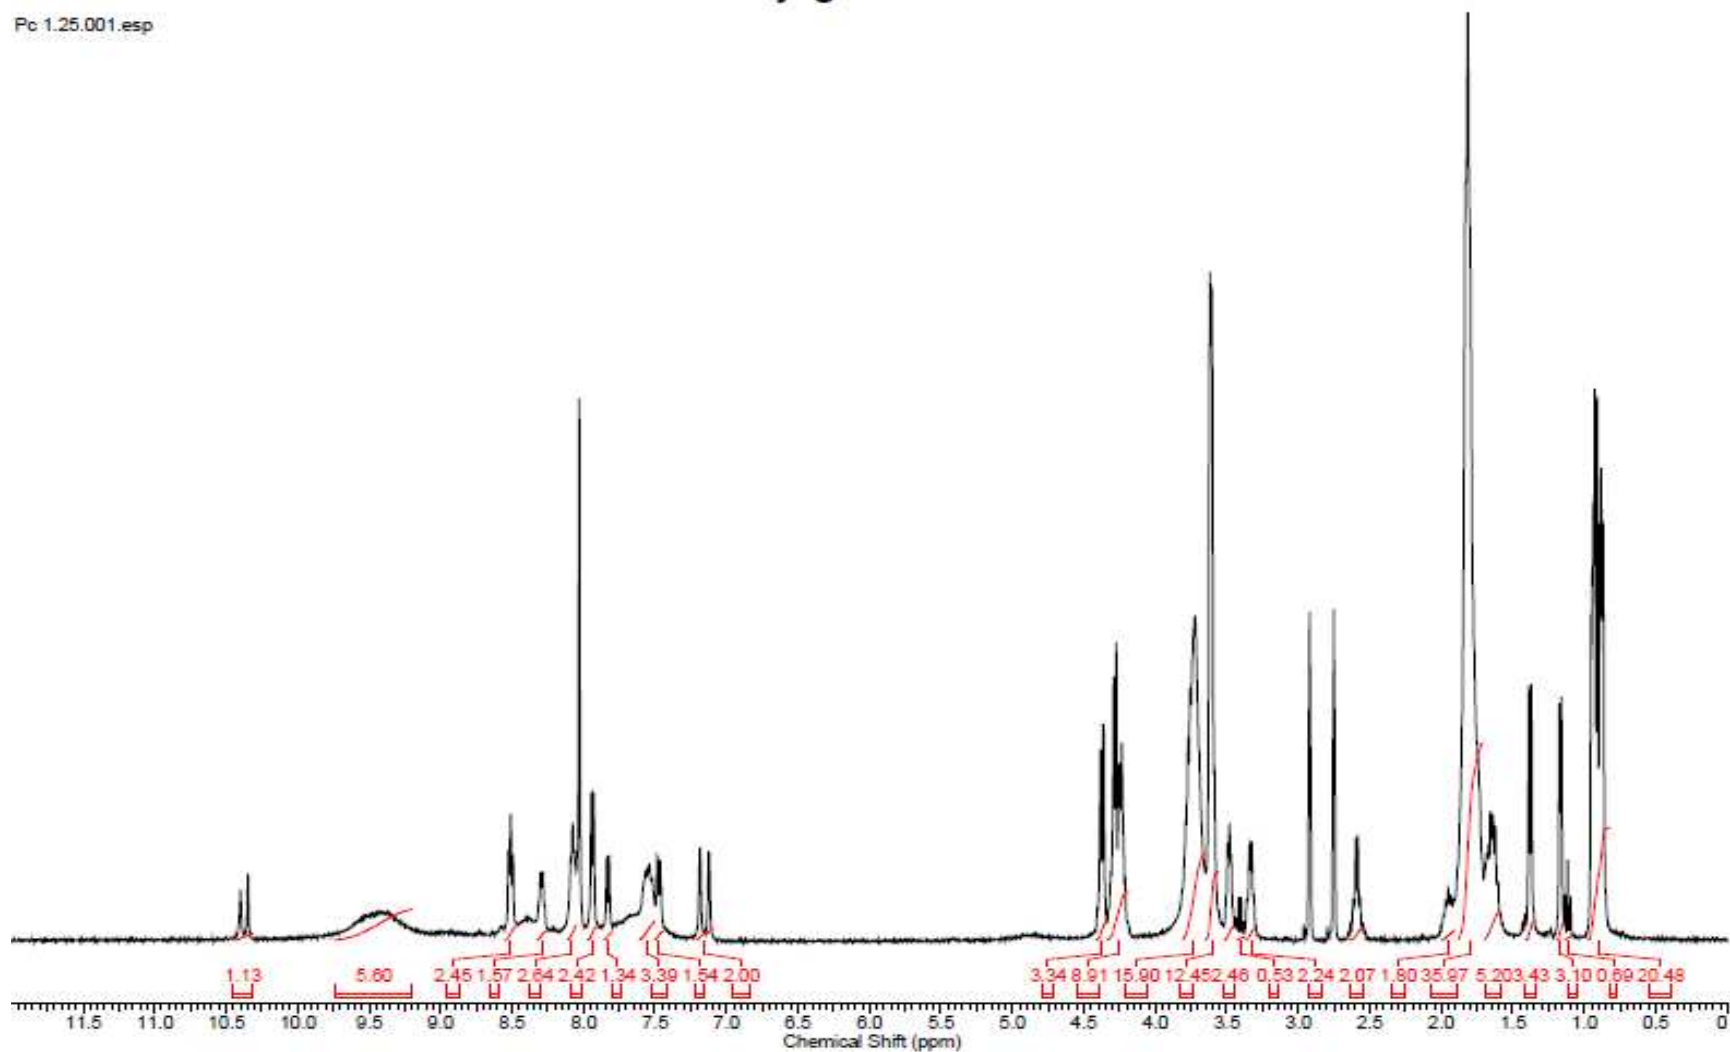

Figure S51. <sup>1</sup>H NMR spectrum for Pc-conjugate 5b

# Pc-Conjugate 5b <sup>13</sup>CNMR

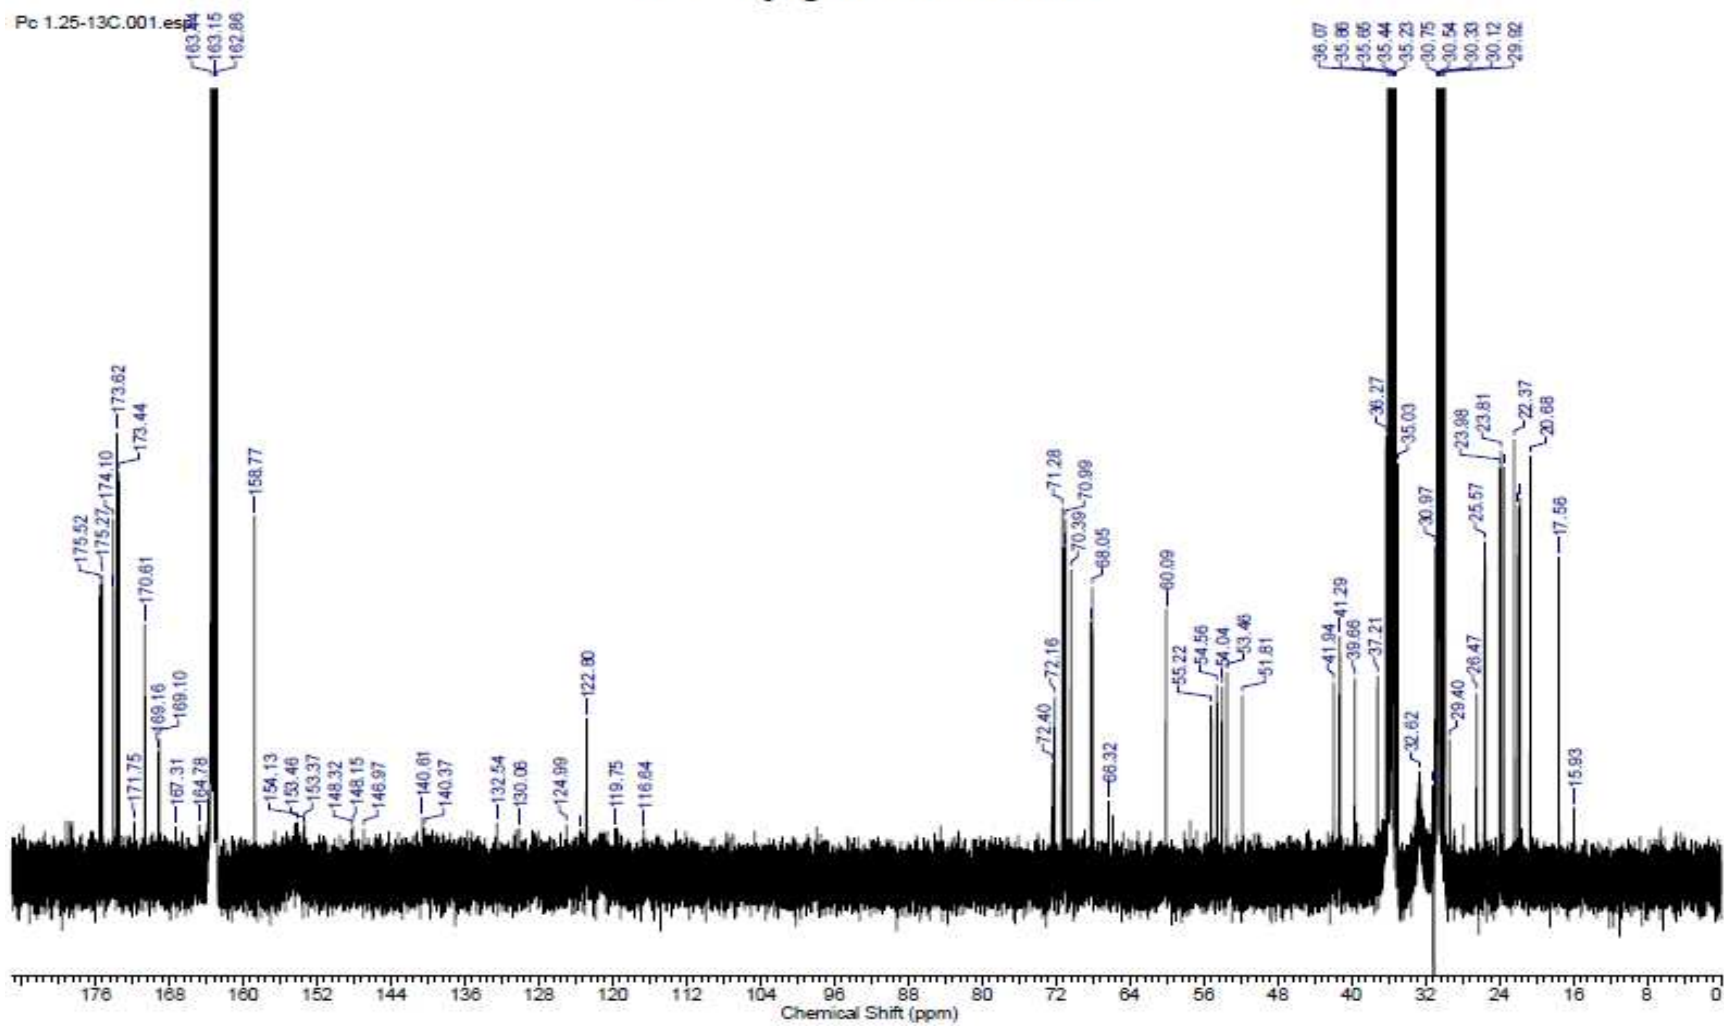

Figure S52. <sup>13</sup>CNMR spectrum for Pc-conjugate 5b

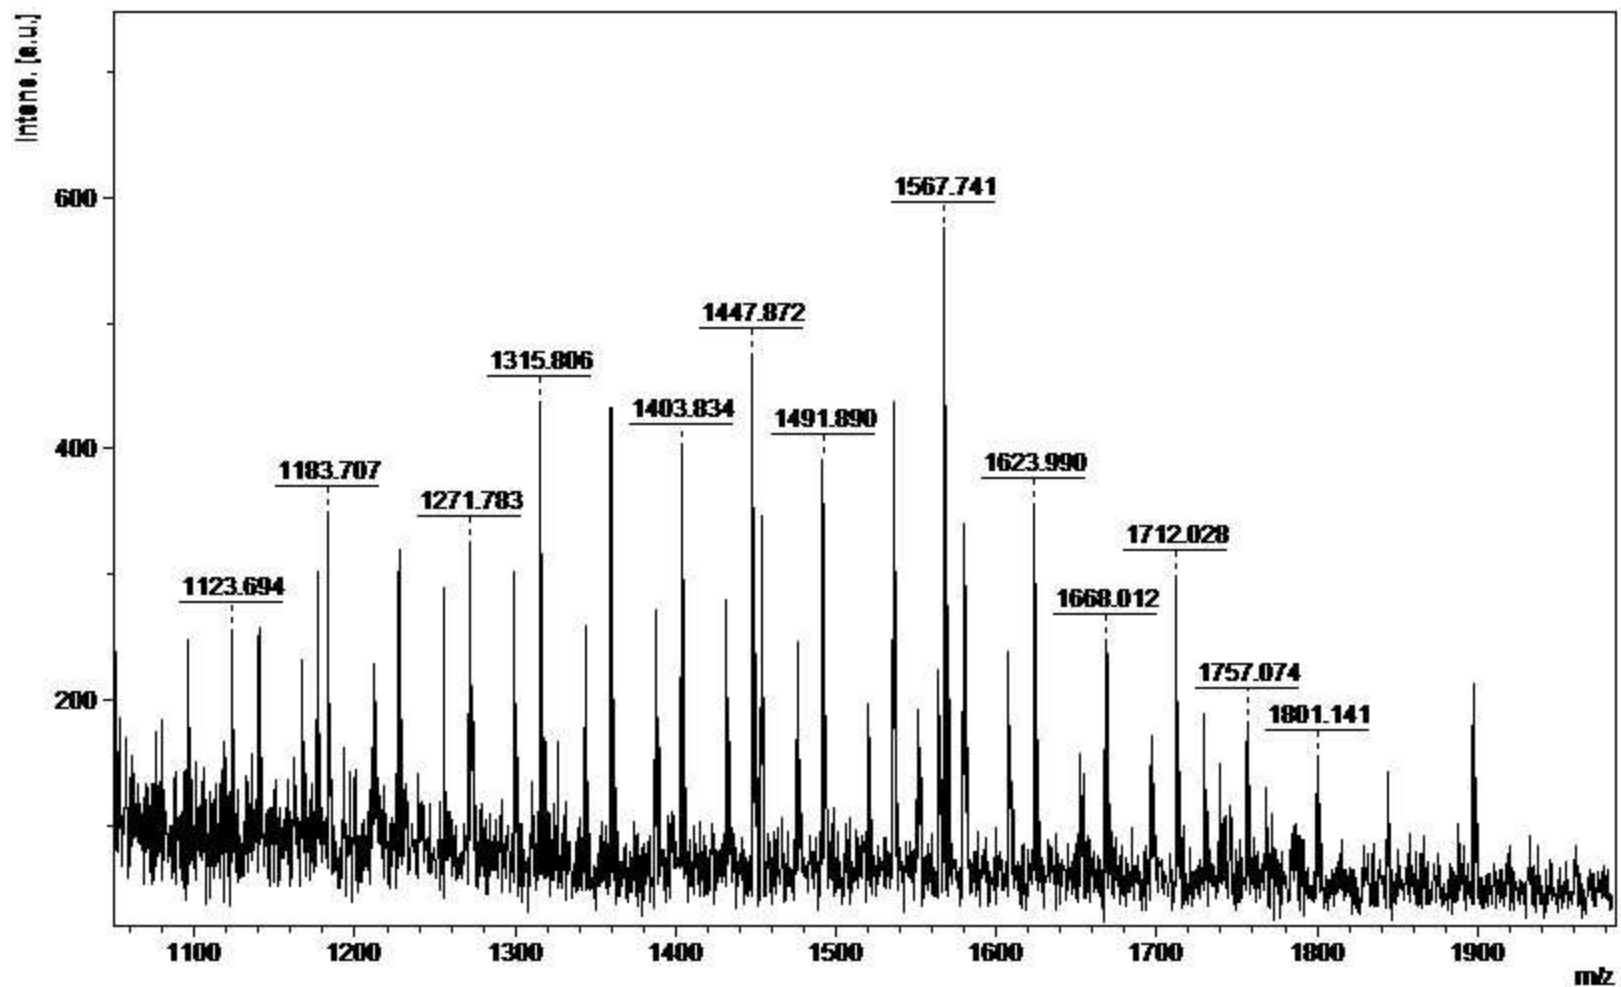

Figure S53. MALDI-TOF (MS) spectrum for Pc-conjugate **5b** extract from HT-29 mouse-tumor after one day

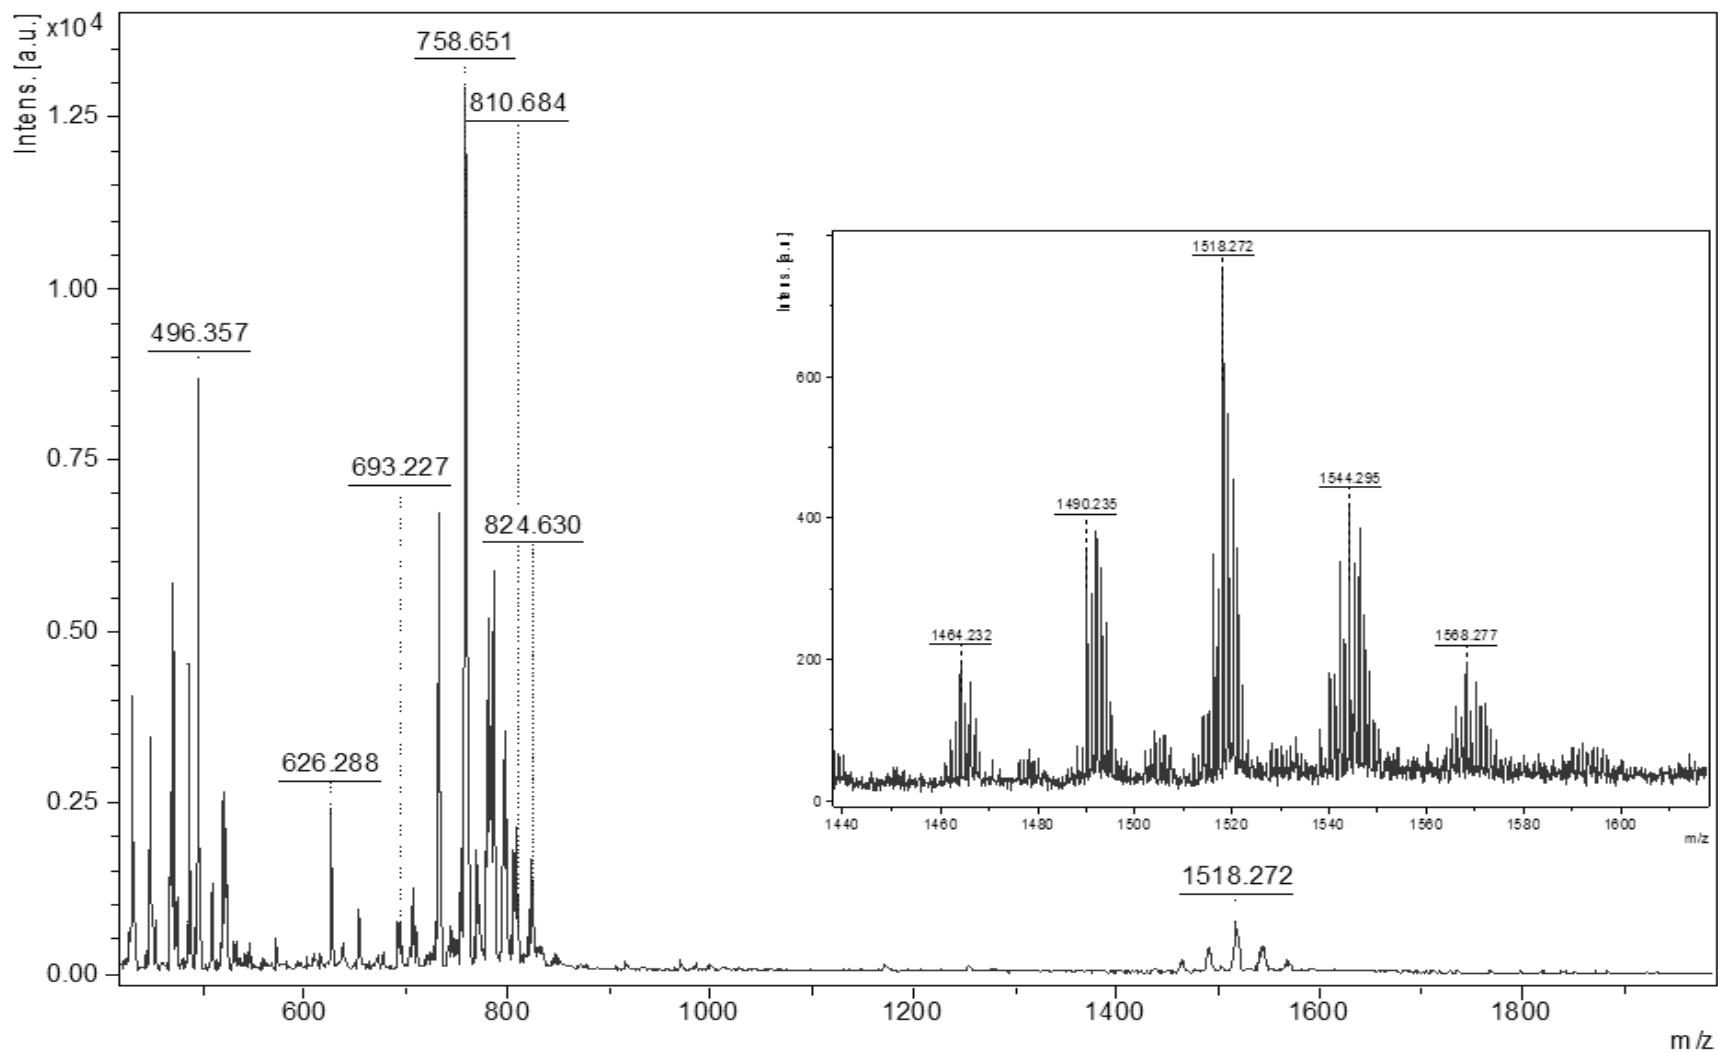

**Figure S54.** MALDI-TOF (MS) spectrum for Pc-conjugate **5b** extract from HT-29 mouse-tumor after four days

## Low Energy Docked Structures

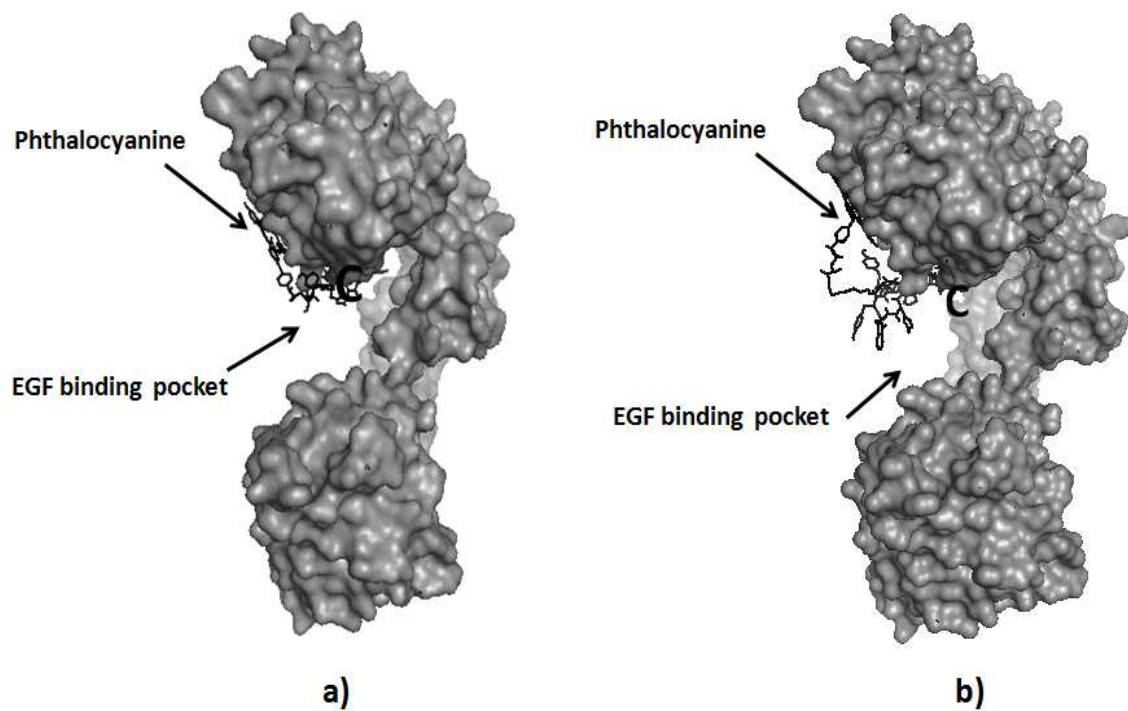

**Figure S55.** Low energy docked structures of a) **4b**, and b) **6a**. Notice that the peptide part of the conjugates are bound near EGF binding pocket of EGFR whereas, phthalocyanine part is anchored to the hydrophobic region outside EGF binding pocket.

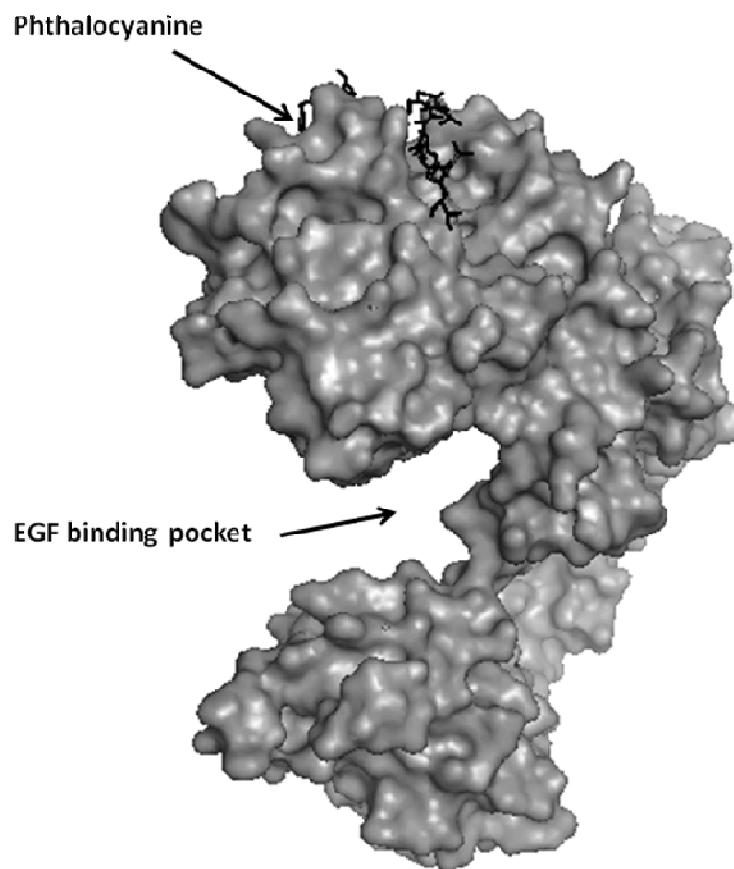

**Figure S56.** Low energy docked structure of **5b**. Notice that the peptide part of the conjugates are bound away from EGF binding pocket in a groove on EGFR whereas, phthalocyanine part is outside the groove.

## Effect of DMSO and Cremophor on HT-29 eGFP and A431 cells

a)

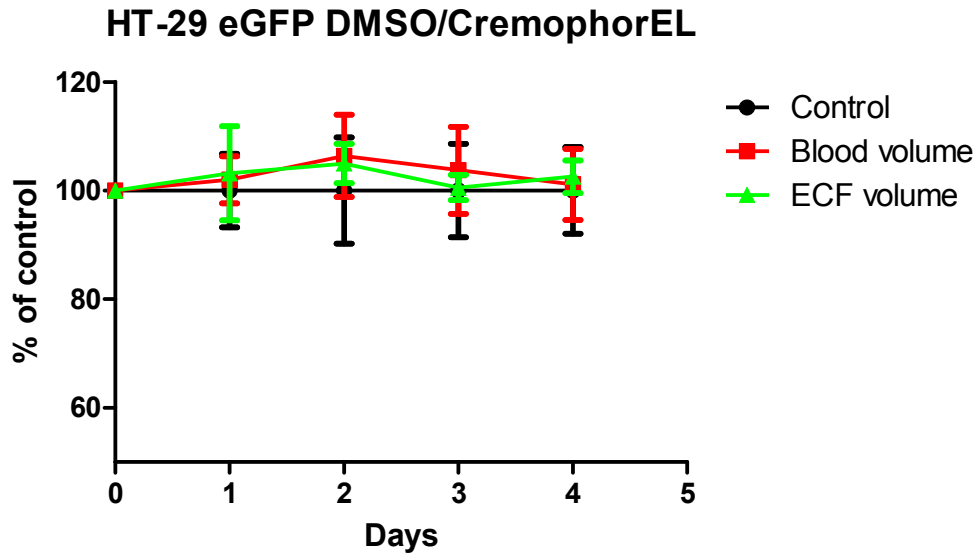

b)

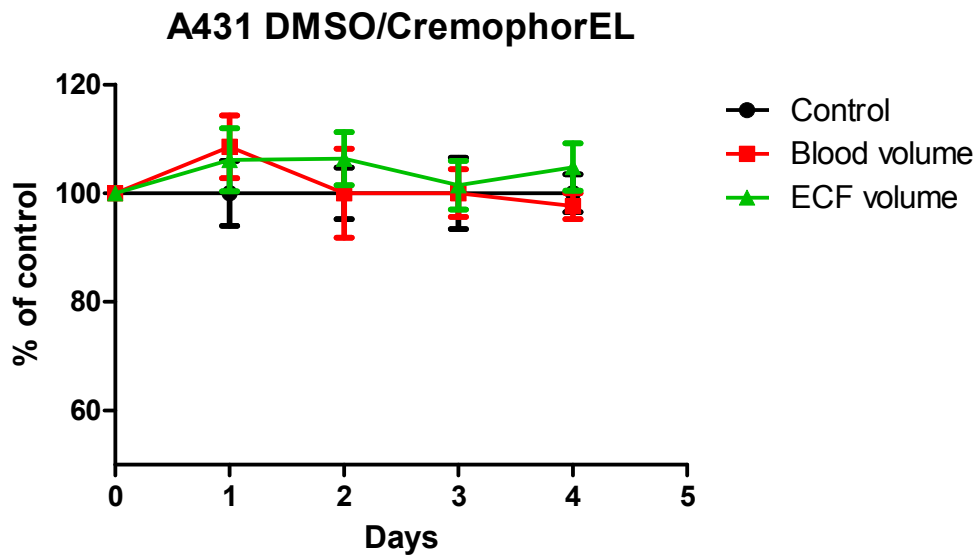

Figure S57. Effect of DMSO and Cremophor on a) HT-29 eGFP and b) A431 cells



**Methods:** To rule out toxicity related to the concentration of DMSO (10%) and Cremophor EL (5%) used to solubilize the conjugates, an additional viability assay was performed *in vitro* to estimate cancer tissue exposure *in vivo*. *In vivo*, the intravenous injection bolus (10 mg of Pc conjugate/Kg b.wt.) is immediately diluted first, by the mouse's blood volume and later by distribution into the extracellular fluid. Therefore 10% DMSO/5% Cremophor EL was added to media to a dilution matching that of a 20  $\mu$ l injection bolus in the total blood volume of a mouse (based on body weight) and to a dilution matching that of a 20  $\mu$ l injection in the extracellular fluid volume. The volume of 20  $\mu$ L was used since this volume was the average quantity of conjugate administered IV to mice which averaging 35 grams each. These dilutions likely overestimate the level of DMSO and Cremophor exposure to cells since they assume no metabolism or intracellular uptake.

Addition of DMSO and Cremophor to culture media was tested on HT-29 eGFP and A431 cells. Each cell line was plated into 24-well plates at a seeding density of 5000 cells/cm<sup>2</sup> and allowed to attach overnight. Cell cultures were then washed with D-PBS and cultured with DMEM (without serum). The DMSO and Cremophor EL mixture was then diluted into the media at 1:148 representing the level of dilution into total blood volume of the mouse (84.7 ml/Kg, C. Riches, J. G. Sharp, D. Brynmor Thomas, and S. Vaughan Smith. Blood volume determination in the mouse. *J Physiol.* **1973** January; 228(2): 279–284) and 1:350 representing dispersion throughout the extracellular fluid volume (20% body weight, Neil E Rowland. Food or Fluid Restriction in Common Laboratory Animals: Balancing Welfare Considerations with Scientific Inquiry. *Comparative Medicine.* Vol 57, No 2, April **2007**. Pages 149–160). Viability of each culture was measured over 4 days (96 h) using Calcein blue AM (purchased from Invitrogen) loaded cells. Calcein is a viability dye taken and metabolized into a fluorophor by live cells. The fluorescence of treated cells was determined as a percent of control (untreated) cells each day.

**Results:** Addition of DMSO and Cremophor to culture media (Figure S57) at either blood volume or extracellular fluid volume dilutions showed no effect on cell viability over a 96 h period suggesting it is unlikely that these agents resulted in toxicity *in vivo* after dilution and distribution. In addition, the concentration of Cremophor in the blood volume dilution exceed that used for the uptake, dark toxicity and phototoxicity culture assays suggesting that it did not contribute to toxicity in these assays.

## SPR Experiments

**Table S1.** Summary of measured resonance units (RU) for binding of peptides and Pc conjugates to EGFR using SPR (according to W. D. Wilson, Science **2002**, 295, 2103), using 100  $\mu$ M concentrations of all analytes.

| # | analyte      | RU after 1 s | RU after 2 s |
|---|--------------|--------------|--------------|
| 1 | Pc <b>3b</b> | 159.2 RU     | 52.6 RU      |
| 2 | EGFR-L1      | 149.5 RU     | 35RU         |
| 3 | Pc <b>5b</b> | 172.3 RU     | 92.2 RU      |
| 4 | EGFR-L2      | 209.3 RU     | 56.3U        |
| 5 | Pc <b>6a</b> | 215.3 RU     | 64 RU        |

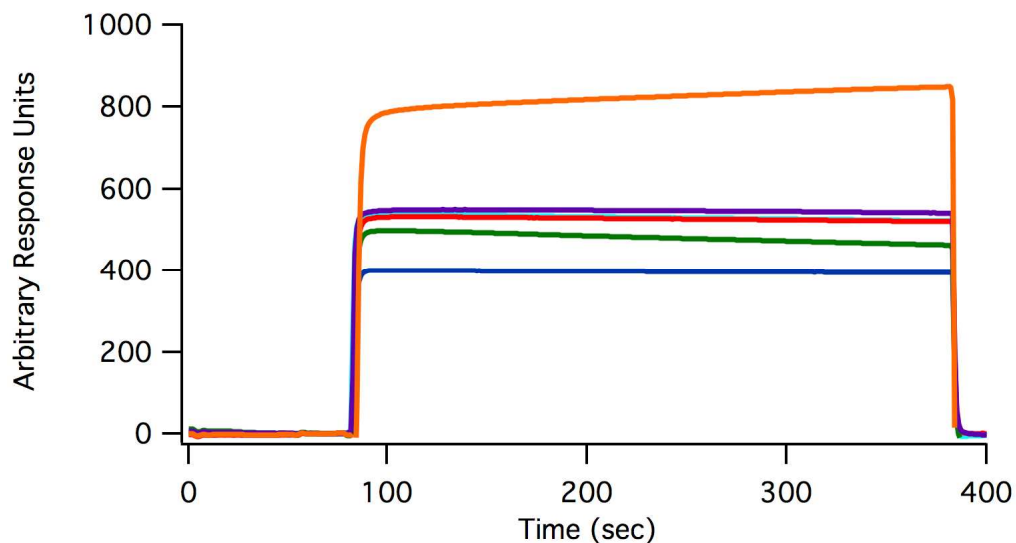

**Figure S58.** Sensogram showing the interaction of EGF (orange), peptides EGFR-L1 (green), EGFR-L2 (purple) and Pc conjugates **3b** (blue), **5b** (turquoise) and **6a** (red) with EGFR immobilized on a CM5 sensor chip (see Table S1 above for RU values). Background (solvent/buffer) not subtracted.
